# Supplementary material for: Genome-Wide Analysis of MicroRNAs and Their Target Genes Related to Leaf Senescence of Rice
Source: PLoS One. 2014 Dec 5;9(12):e114313. doi: 10.1371/journal.pone.0114313 (PMC4257594; doi:10.1371/journal.pone.0114313)
Supplement: Table S1 — Profile of the known miRNAs in rice leaves referred to miRbase20.0. (XLS) [file pone.0114313.s001.xls]

## Sheet: Table S1
Table S2. Profile of the known microRNAs in Rice referred to miRbase20.0.
Pre-miRNA Index	miRNA_Index	type	miR_name	miR_seq	len	Sequence in miRbase	N2Y6-E(raw)	N2Y6-M(raw)	N2Y6-L(raw)	LYP9-E(raw)	LYP9-M(raw)	LYP9-L(raw)	N2Y6-E(norm)	N2Y6-M(norm)	N2Y6-L(norm)	LYP9-E(norm)	LYP9-M(norm)	LYP9-L(norm)	genomeID	strand	start	end	genome_seq	mir_seq in miRBase	#mir	mirIDs,	rep_mirID	rep_mirSeq		rep_miRID	rep_miRSeq	SS	CG%	dG	MFEI
1	1	5'	osa-miR156a	TGACAGAAGAGAGTGAGCAC	20	Yes	44.5556	56.8667	77.3333	118.044	65.0889	115.539	47.073	49.1883	71.9565	106.551	80.3337	129.566	Chr1	-	22524147	22524246	ggagggTGACAGAAGAGAGTGAGCACacgtggttgtttccttgcataaatgatgcctatgcttggagctacgcgtgctcacttctctctctgtcacctcc	Y	1	osa-MIR156a,	osa-MIR156a	ggagggTGACAGAAGAGAGTGAGCACacgtggttgtttccttgcataaatgatgcctatgcttggagctacgcgtgctcacttctctctctgtcacctcc	1	osa-miR156a	TGACAGAAGAGAGTGAGCAC	(((.((((((((((((((((((((((.((((((....(((..(((((.........)))))..))))))))).)))))))).))))).))))))))))))	52	-57.8	1.1
2	2	5'	osa-miR156b	TGACAGAAGAGAGTGAGCAC	20	Yes	44.5556	56.8667	77.3333	118.044	65.0889	115.539	47.073	49.1883	71.9565	106.551	80.3337	129.566	Chr1	+	4666341	4666516	ttgtcttgagaggggaagagatctctatgggttttggaggtcTGACAGAAGAGAGTGAGCACacacggtgctttcttagcatgcaagagccatgctgggagctgtgcgtGCTCACTCTCTATCTGTCAGCcgttcaccatgcccaatatgattaatctccttctctcagttgacag	Y	2	osa-MIR156b,sbi-MIR156b,	osa-MIR156b	ttgtcttgagaggggaagagatctctatgggttttggaggtcTGACAGAAGAGAGTGAGCACacacggtgctttcttagcatgcaagagccatgctgggagctgtgcgtGCTCACTCTCTATCTGTCAGCcgttcaccatgcccaatatgattaatctccttctctcagttgacag	1	osa-miR156a	TGACAGAAGAGAGTGAGCAC	.(((((((((((..(.(((((((....(((((..((((((.(((((((((((((((((((((.((((((....((..(((((((....).))))))..)))))))).))))))))))))).)))))))))).))))....)))))....))))..))).)..)))))))..)))).	49.4	-92.3	1.1
2	3	3'	osa-miR156b-3p	GCTCACTCTCTATCTGTCAGC	21	Yes	0	0	1	1	0	0	0	0	0.930472	0.902638	0	0	Chr1	+	4666341	4666516	ttgtcttgagaggggaagagatctctatgggttttggaggtcTGACAGAAGAGAGTGAGCACacacggtgctttcttagcatgcaagagccatgctgggagctgtgcgtGCTCACTCTCTATCTGTCAGCcgttcaccatgcccaatatgattaatctccttctctcagttgacag	Y	2	osa-MIR156b,sbi-MIR156b,	osa-MIR156b	ttgtcttgagaggggaagagatctctatgggttttggaggtcTGACAGAAGAGAGTGAGCACacacggtgctttcttagcatgcaagagccatgctgggagctgtgcgtGCTCACTCTCTATCTGTCAGCcgttcaccatgcccaatatgattaatctccttctctcagttgacag	1	osa-miR156b-3p	GCTCACTCTCTATCTGTCAGC	.(((((((((((..(.(((((((....(((((..((((((.(((((((((((((((((((((.((((((....((..(((((((....).))))))..)))))))).))))))))))))).)))))))))).))))....)))))....))))..))).)..)))))))..)))).	49.4	-92.3	1.1
3	4	5'	osa-miR156c	TGACAGAAGAGAGTGAGCAC	20	Yes	44.5556	56.8667	77.3333	118.044	65.0889	115.539	47.073	49.1883	71.9565	106.551	80.3337	129.566	Chr1	+	4665975	4666123	ggaggaagagaggggtgagaggtgaggcTGACAGAAGAGAGTGAGCACacatggtgactttcttgcatgctgaatggactcatgcttgaagctatgtgtGCTCACTTCTCTCTCTGTCAGCcatttgatctctctttctctctttctcc	Y	4	osa-MIR156c,sbi-MIR156c,mdm-MIR156b,mdm-MIR156o,	osa-MIR156c	ggaggaagagaggggtgagaggtgaggcTGACAGAAGAGAGTGAGCACacatggtgactttcttgcatgctgaatggactcatgcttgaagctatgtgtGCTCACTTCTCTCTCTGTCAGCcatttgatctctctttctctctttctcc	1	osa-miR156a	TGACAGAAGAGAGTGAGCAC	((((((((((((..(.(((((((.(((((((((((((((((((((((((((((((....(((..(((((((....))...)))))..))))))))))))))))))).)))).))))))))))...).))))))))..))))))))))))	49	-90.9	1.2
3	5	3'	osa-miR156c-3p	GCTCACTTCTCTCTCTGTCAGC	22	Yes	3	0	1	0	0	2	3.1695	0	0.930472	0	0	2.24281	Chr1	+	4665975	4666123	ggaggaagagaggggtgagaggtgaggcTGACAGAAGAGAGTGAGCACacatggtgactttcttgcatgctgaatggactcatgcttgaagctatgtgtGCTCACTTCTCTCTCTGTCAGCcatttgatctctctttctctctttctcc	Y	4	osa-MIR156c,sbi-MIR156c,mdm-MIR156b,mdm-MIR156o,	osa-MIR156c	ggaggaagagaggggtgagaggtgaggcTGACAGAAGAGAGTGAGCACacatggtgactttcttgcatgctgaatggactcatgcttgaagctatgtgtGCTCACTTCTCTCTCTGTCAGCcatttgatctctctttctctctttctcc	1	osa-miR156c-3p	GCTCACTTCTCTCTCTGTCAGC	((((((((((((..(.(((((((.(((((((((((((((((((((((((((((((....(((..(((((((....))...)))))..))))))))))))))))))).)))).))))))))))...).))))))))..))))))))))))	49	-90.9	1.2
4	6	5'	osa-miR156d_L+1	TTGACAGAAGAGAGTGAGCAC	21	Diff	541.556	840.867	931	1378.88	954.089	1576.62	572.154	727.329	866.27	1244.63	1177.55	1768.03	Chr2	-	4512884	4513012	ggagaagctctcatgagaTTGACAGAAGAGAGTGAGCACacggcgtgatggccggcataaaatctatcccgtcctcgccgcgtGCTCACTCCTCTTTCTGTCACCctctttctctcagggctcaactcc	Y	2	osa-MIR156d,sbi-MIR156a,	osa-MIR156d	ggagaagctctcatgagatTGACAGAAGAGAGTGAGCACacggcgtgatggccggcataaaatctatcccgtcctcgccgcgtgctcactcctctttctgtcaccctctttctctcagggctcaactcc	1	osa-miR156a	TGACAGAAGAGAGTGAGCAC	((((.((((((...(((..((((((((((((((((((((.(((((....((.(((.(((.....))).))).)).))))).)))))))))).)))).))))))..)))........))))))...))))	55	-61.1	0.9
4	7	3'	osa-MIR156d-p3	GCTCACTCCTCTTTCTGTCACC	22	New	133	210	139	389	184	287.5	140.515	181.645	129.336	351.126	227.096	322.403	Chr2	-	4512884	4513012	ggagaagctctcatgagaTTGACAGAAGAGAGTGAGCACacggcgtgatggccggcataaaatctatcccgtcctcgccgcgtGCTCACTCCTCTTTCTGTCACCctctttctctcagggctcaactcc	Y	2	osa-MIR156d,sbi-MIR156a,	osa-MIR156d	ggagaagctctcatgagatTGACAGAAGAGAGTGAGCACacggcgtgatggccggcataaaatctatcccgtcctcgccgcgtgctcactcctctttctgtcaccctctttctctcagggctcaactcc	1	osa-MIR156d-p3	gctcactcctctttctgtcacc	((((.((((((...(((..((((((((((((((((((((.(((((....((.(((.(((.....))).))).)).))))).)))))))))).)))).))))))..)))........))))))...))))	55	-61.1	0.9
5	8	5'	osa-miR156e	TGACAGAAGAGAGTGAGCAC	20	Yes	44.5556	56.8667	77.3333	118.044	65.0889	115.539	47.073	49.1883	71.9565	106.551	80.3337	129.566	Chr4	-	25026327	25026430	ggcgcgaggTGACAGAAGAGAGTGAGCACacggccgggcgtgacggcaccggcgggcgtgccgtcgcggccgcgtGCTCACTGCTCTTTCTGTCATCCggtgcc	Y	2	osa-MIR156e,sbi-MIR156h,	osa-MIR156e	ggcgcgaggTGACAGAAGAGAGTGAGCACacggccgggcgtgacggcaccggcgggcgtgccgtcgcggccgcgtgctcactgctctttctgtcatccggtgcc	1	osa-miR156a	TGACAGAAGAGAGTGAGCAC	(((((..((((((((((((((((((((((.(((((....((((((((((........))))))))))))))).))))))))).))))).))))))))..)))))	71.2	-73.2	1
6	9	5'	osa-miR156f_L+1	TTGACAGAAGAGAGTGAGCAC	21	Diff	541.556	840.867	931	1378.88	954.089	1576.62	572.154	727.329	866.27	1244.63	1177.55	1768.03	Chr8	+	21478230	21478415	agTTGACAGAAGAGAGTGAGCACacagcggccagactgcatcgatctatcaatcttcccttcgacaggatagctagatagaaagaaagagaggccgtcggcggccatggaaGAGAGAGAGAGAGAGAGAtgaaatgatgatgatgatacagctgccgctgcgtgctcacttctctttctgtcagct	Y	1	osa-MIR156f,	osa-MIR156f	agtTGACAGAAGAGAGTGAGCACacagcggccagactgcatcgatctatcaatcttcccttcgacaggatagctagatagaaagaaagagaggccgtcggcggccatggaagagagagagagagagagatgaaatgatgatgatgatacagctgccgctgcgtGCTCACTTCTCTTTCTGTCAGCt	1	osa-miR156a	TGACAGAAGAGAGTGAGCAC	(((((((((((((((((((((((.(((((((.((.(((((((..(((.((..((((..((((....((....)).................(((((....)))))...)))).))))..)).)))..))))..((.((....)).)).)))))))))))).)))))))).)))).)))))))))))	50	-79.9	0.9
7	10	5'	osa-miR156g	TGACAGAAGAGAGTGAGCAC	20	Yes	44.5556	56.8667	77.3333	118.044	65.0889	115.539	47.073	49.1883	71.9565	106.551	80.3337	129.566	Chr9	+	15065253	15065352	ggcTGACAGAAGAGAGTGAGCACacagcgggcagactgcatctgaattacctgttGCGACGAAGAAGACGAcggacgcagcttgccgttgcgtgctcact	Y	1	osa-MIR156g,	osa-MIR156g	ggcTGACAGAAGAGAGTGAGCACacagcgggcagactgcatctgaattacctgttgcgacgaagaagacgacggacgcagcttgccgttgcgtGCTCACTTCTCTCTCTGTCAGCt	0	osa-miR156a	TGACAGAAGAGAGTGAGCAC	..............(((((((((.((((((.((..((((.((((.........(((...))).........)))).))))..)))))))).)))))))))	57	-37.8	0.7
8	11	5'	osa-miR156i	TGACAGAAGAGAGTGAGCAC	20	Yes	44.5556	56.8667	77.3333	118.044	65.0889	115.539	47.073	49.1883	71.9565	106.551	80.3337	129.566	Chr2	-	24119983	24120088	gggcggTGACAGAAGAGAGTGAGCACacggccgggcggaacggcaccggcggatgtgccgtcgcggccgcgtGCTCACTGCTCTGTCTGTCATCcactcctctccc	Y	4	osa-MIR156i,sbi-MIR156g,zma-MIR156i,zma-MIR156l,	osa-MIR156i	ggTGACAGAAGAGAGTGAGCACacggccgggcggaacggcaccggcggatgtgccgtcgcggccgcgtgctcactgctctgtctgtcatc	0	osa-miR156a	TGACAGAAGAGAGTGAGCAC	(((.((((((((((((((((((((((.(((((..(((..(((((((........))))))))))))))).))))))))).)))).))))))).)).))).......	68.9	-64	0.9
9	12	5'	osa-miR156j_L+1	TTGACAGAAGAGAGTGAGCAC	21	Diff	541.556	840.867	931	1378.88	954.089	1576.62	572.154	727.329	866.27	1244.63	1177.55	1768.03	Chr6		26554795	26554959	ttggggcggggcgggatcgagcatatgaaaggcgagattgTTGACAGAAGAGAGTGAGCACacggcgcggcggctagccatcggcgggatGCCTGCCCCCGCCGCgtgctcgctcctctttctgtcagcatctctcatcactccctcccgcatcccccgccccga	Y	2	osa-MIR156j,osa-MIR156h,	osa-MIR156j	gagattgtTGACAGAAGAGAGTGAGCACacggcgcggcggctagccatcggcgggatgcctgcccccgccgcgtGCTCGCTCCTCTTTCTGTCAGCatctc	0	osa-miR156a	TGACAGAAGAGAGTGAGCAC	((((((((((((((((..(((...((((.....((((.(((((((((((((((((((((((.(((((.((.(((.((.((((.....)))).)))))))))))).))))))))).))).)))))))))))))))))))..)))..))))))....))))))))))	65.5	-102.1	0.9
10	13	3'	osa-miR156L-3p	GCTCACTTCTCTTTCTGTCAGC	22	Yes	0	2	1	1	0	0	0	1.72995	0.930472	0.902638	0	0	Chr5	+	5230609	5230764	gctagggagccGACAGAAGAGAGTGAGCATatatagttctttccttgcatatgtggtcatatgtgtgttgactgaagagatacatatatatagagagagagagttcatgtgcttgaagctatatgtGCTCACTTCTCTTTCTGTCAGCaaattatc	Y	1	osa-MIR156l,	osa-MIR156l	gctagggagcCGACAGAAGAGAGTGAGCATAtatagttctttccttgcatatgtggtcatatgtgtgttgactgaagagatacatatatatagagagagagagttcatgtgcttgaagctatatgtGCTCACTTCTCTTTCTGTCAGCaaattatc	1	osa-miR156f-3p	GCTCACTTCTCTTTCTGTCAGC	........((.((((((((((((((((((((((((((...(((...(((((((...(((((((((((((.........)))))))))))...........))...)))))))..))))))))))))))))))).))))).))))).))........	39.7	-58.2	0.9
11	14	3'	osa-miR159a.1	TTTGGATTGAAGGGAGCTCTG	21	Yes	5471.17	10520.6	6560	28465.5	17799.8	24740.1	5780.3	9100.04	6103.9	25694.1	21968.8	27743.6	Chr1	+	17681923	17682194	gttgtggacgttgagctcctttcggtccaaaaaggggtgttgctgtgggtcgattgAGCTGCTGGGTCATGGATCCcgttagcctactccatgttcatcattcagctcgagatctgaaagaaactactccaatttatactaatagtatgtgtgtagataggaaaatgatggagtactcgttgttgggataggcttatggcttgcatgccccaggagctgcatcaaccctacatggaccctcTTTGGATTGAAGGGAGCTCTGcatcttttgt	Y	2	osa-MIR159a,tae-MIR159b,	osa-MIR159a	gttgtggacgttgagctcctttcggtccaaaaaggggtgttgctgtgggtcgattgagctgctgggtcatggatcccgttagcctactccatgttcatcattcagctcgagatctgaaagaaactactccaatttatactaatagtatgtgtgtagataggaaaatgatggagtactcgttgttgggataggcttatggcTTGCATGCCCCAGGAGCTGCAtcaaccctacatggaccctcTTTGGATTGAAGGGAGCTCTGcatcttttgt	1	osa-miR159a.1	TTTGGATTGAAGGGAGCTCTG	.....(((.(..(((((((((((..(((((..(((((.(((..(((((((.(((..((((.(((((.((((....((((.((((((..(((..((((((((((((........))))..........(((.((((((((...........)))))))).)))..))))))))..((.....)))))..)))))).))))....)))).))))).))))..))).)))).)))..)))))))))))))..)))))))))))..).))).....	47.1	-110.2	0.9
12	15	5'	osa-MIR159b-p5	GAGCTCCTTTCGTTCCAATG	20	New	12	47	15	264	176	137.333	12.678	40.6538	13.9571	238.296	217.222	154.006	Chr1	+	1215030	1215217	ggttatgaagtgGAGCTCCTTTCGTTCCAATGaaaggtttatctgaagggtgatacagctgcttgttcatggttcccactattctatctcataggaaaagagataggcttgtggtttgcatgaccaaggagccgaatcaactccttgctgaccactcTTTGGATTGAAGGGAGCTCTGcatcttgatc	Y	2	osa-MIR159b,hvu-MIR159a,	osa-MIR159b	ggttatgaagtggagctcctttcgttccaatgaaaggtttatctgaagggtgatacagctgcttgttcatggttcccactattctatctcataggaaaagagataggcttgtggtttgcatgaccaaggagccgaatcaactccttgctgaccactcTTTGGATTGAAGGGAGCTCTGcatcttgatc	1	osa-MIR159b-p5	gagctcctttcgttccaatg	(((((.((.(..(((((((((((..(((((.((..((((......(((((((((...(((.((((.(((((....((((...((((((((.........))))))))...))))....))))).)))).)))...))).)).))))...))))..)).)))))..)))))))))))..).)).)))))	45.2	-76.8	0.9
12	16	3'	osa-miR159b	TTTGGATTGAAGGGAGCTCTG	21	Yes	5471.17	10520.6	6560	28465.5	17799.8	24740.1	5780.3	9100.04	6103.9	25694.1	21968.8	27743.6	Chr1	+	1215030	1215217	ggttatgaagtgGAGCTCCTTTCGTTCCAATGaaaggtttatctgaagggtgatacagctgcttgttcatggttcccactattctatctcataggaaaagagataggcttgtggtttgcatgaccaaggagccgaatcaactccttgctgaccactcTTTGGATTGAAGGGAGCTCTGcatcttgatc	Y	2	osa-MIR159b,hvu-MIR159a,	osa-MIR159b	ggttatgaagtggagctcctttcgttccaatgaaaggtttatctgaagggtgatacagctgcttgttcatggttcccactattctatctcataggaaaagagataggcttgtggtttgcatgaccaaggagccgaatcaactccttgctgaccactcTTTGGATTGAAGGGAGCTCTGcatcttgatc	1	osa-miR159a.1	TTTGGATTGAAGGGAGCTCTG	(((((.((.(..(((((((((((..(((((.((..((((......(((((((((...(((.((((.(((((....((((...((((((((.........))))))))...))))....))))).)))).)))...))).)).))))...))))..)).)))))..)))))))))))..).)).)))))	45.2	-76.8	0.9
14	18	5'	osa-MIR159e-p5	AGCTGCCGGTTCATGGATACC	21	New	0	1.33333	0.916667	6.66667	3.33333	0.333333	0	1.1533	0.852933	6.01759	4.11405	0.373801	Chr1	-	9760708	9760898	gatgaagaagaagagctccctttcgatccaattcaggagaggaagtggtaggatgcAGCTGCCGGTTCATGGATACCtctggagtgcagggcaaatagtcctaccctttcatgggtttgcatgactcgggagatgaacccgccattgtcttcctctattgaTTGGATTGAAGGGAGCTcctctagctacat	Y	1	osa-MIR159e,	osa-MIR159e	gatgaagaagaagagctccctttcgatccaattcaggagaggaagtggtaggatgcagctgccggttcatggatacctctggagtgcagggcaaatagtcctaccctttcatgggtttgcatgactcgggagatgaacccgccattgtcttcctctattgATTGGATTGAAGGGAGCTCCTctagctacat	1	osa-MIR159e-p5	agctgccggttcatggatacc	.(((.((.(((.((((((((.(((((((((((.((..(((((((((((..((...((.((.(((..(((((...(((..(((((...(((((.....)))))....)))))..)))...)))))..))).)).))..))..)))....))))))))..))))))))))))))))))))).)))..)).)))	49.7	-86.1	0.9
15	20	5'	osa-MIR159f-p5	AGCTCCCTTCGATCCAATCC	20	New	13	24.3333	18.9167	25.6667	14.3333	28.3333	13.7345	21.0477	17.6014	23.1677	17.6904	31.7731	Chr1	+	6693112	6693292	gaagaagaagacgAGCTCCCTTCGATCCAATCCaggagaggaagtggtaggatgcagctgccggttcatggatacctctgcagtgcatgtcgtaggcttgcacttgcatgggtttgcatgacccgggagatgaacccaccattgtcttcctcttatgCTTGGATTGAAGGGAGCTCTacac	Y	1	osa-MIR159f,	osa-MIR159f	gaagaagaagacgagctcccttcgatccaatccaggagaggaagtggtaggatgcagctgccggttcatggatacctctgcagtgcatgtcgtaggcttgcacttgcatgggtttgcatgacccgggagatgaacccaccattgtcttcctcttatgCTTGGATTGAAGGGAGCTCTAcacctctctc	0	osa-MIR159f-p5	agctcccttcgatccaatcc	............((((((((((((((((((..((..((((((((((((.((...((.((.((((.(((((...(((..(((((((((.((.....)).))))).))))..)))...))))).)))).)).))..)).))))....))))))))..)).)))))))))))))))))).....	52.5	-93.4	1
15	21	3'	osa-miR159f_R-1	CTTGGATTGAAGGGAGCTCT	20	Diff	154	153.917	314.833	290.667	194.667	323.033	162.701	133.134	292.944	262.367	240.261	362.25	Chr1	+	6693112	6693292	gaagaagaagacgAGCTCCCTTCGATCCAATCCaggagaggaagtggtaggatgcagctgccggttcatggatacctctgcagtgcatgtcgtaggcttgcacttgcatgggtttgcatgacccgggagatgaacccaccattgtcttcctcttatgCTTGGATTGAAGGGAGCTCTacac	Y	1	osa-MIR159f,	osa-MIR159f	gaagaagaagacgagctcccttcgatccaatccaggagaggaagtggtaggatgcagctgccggttcatggatacctctgcagtgcatgtcgtaggcttgcacttgcatgggtttgcatgacccgggagatgaacccaccattgtcttcctcttatgCTTGGATTGAAGGGAGCTCTAcacctctctc	0	osa-miR159f	CTTGGATTGAAGGGAGCTCTA	............((((((((((((((((((..((..((((((((((((.((...((.((.((((.(((((...(((..(((((((((.((.....)).))))).))))..)))...))))).)))).)).))..)).))))....))))))))..)).)))))))))))))))))).....	52.5	-93.4	1
16	22	5'	osa-miR160a-5p_L+1R-1	GTGCCTGGCTCCCTGTATGCC	21	Diff	54.5	24.35	31.3833	23.0833	32.3167	28.9667	57.5793	21.0621	29.2013	20.8359	39.8857	32.4833	Chr2	-	3511585	3511672	gtGTGCCTGGCTCCCTGTATGCCacacatgtagaccaacccatggtgtctggttgcctactgggtgGCGTGCAAGGAGCCAAGCATGc	Y	2	osa-MIR160a,sbi-MIR160a,	osa-MIR160a	gtgTGCCTGGCTCCCTGTATGCCAcacatgtagaccaacccatggtgtctggttgcctactgggtgGCGTGCAAGGAGCCAAGCATGc	1	osa-miR160a-5p	TGCCTGGCTCCCTGTATGCCA	(..(((.(((((((.((((((((((.((.((((..(((((..........))))).)))))).)))))))))).))))))).)))..)	59.1	-49	0.9
16	23	3'	osa-miR160a-3p	GCGTGCAAGGAGCCAAGCATG	21	Yes	3	2.5	1	0.5	0.5	1.5	3.1695	2.16244	0.930472	0.451319	0.617108	1.6821	Chr2	-	3511585	3511672	gtGTGCCTGGCTCCCTGTATGCCacacatgtagaccaacccatggtgtctggttgcctactgggtgGCGTGCAAGGAGCCAAGCATGc	Y	2	osa-MIR160a,sbi-MIR160a,	osa-MIR160a	gtgTGCCTGGCTCCCTGTATGCCAcacatgtagaccaacccatggtgtctggttgcctactgggtgGCGTGCAAGGAGCCAAGCATGc	1	osa-miR160a-3p	GCGTGCAAGGAGCCAAGCATG	(..(((.(((((((.((((((((((.((.((((..(((((..........))))).)))))).)))))))))).))))))).)))..)	59.1	-49	0.9
17	24	5'	osa-miR160b-5p_L+1R-1	GTGCCTGGCTCCCTGTATGCC	21	Diff	54.5	24.35	31.3833	23.0833	32.3167	28.9667	57.5793	21.0621	29.2013	20.8359	39.8857	32.4833	Chr6	+	28081020	28081158	aaggtttggttttgatcggcttgagagcGTGCCTGGCTCCCTGTATGCCactcatgtagcccaatccatggtgtgtttggatgctgtgggtgGCGTGCAAGGAGCCAAGCATGcgtgccatgatctctctttctgcctt	Y	3	osa-MIR160b,sbi-MIR160b,zma-MIR160g,	osa-MIR160b	aaggtttggttttgatcggcttgagagcgTGCCTGGCTCCCTGTATGCCActcatgtagcccaatccatggtgtgtttggatgctgtgggtgGCGTGCAAGGAGCCAAGCATGcgtgccatgatctctctttctgcctt	1	osa-miR160a-5p	TGCCTGGCTCCCTGTATGCCA	(((((..((....(((((((......((((((.(((((((.((((((((((((((..(((...(((((.........)))))))))))))))))))))).))))))).))))))..)))..))))...))....)))))	54	-67.6	0.9
17	25	3'	osa-miR160b-3p	GCGTGCAAGGAGCCAAGCATG	21	Yes	3	2.5	1	0.5	0.5	1.5	3.1695	2.16244	0.930472	0.451319	0.617108	1.6821	Chr6	+	28081020	28081158	aaggtttggttttgatcggcttgagagcGTGCCTGGCTCCCTGTATGCCactcatgtagcccaatccatggtgtgtttggatgctgtgggtgGCGTGCAAGGAGCCAAGCATGcgtgccatgatctctctttctgcctt	Y	3	osa-MIR160b,sbi-MIR160b,zma-MIR160g,	osa-MIR160b	aaggtttggttttgatcggcttgagagcgTGCCTGGCTCCCTGTATGCCActcatgtagcccaatccatggtgtgtttggatgctgtgggtgGCGTGCAAGGAGCCAAGCATGcgtgccatgatctctctttctgcctt	1	osa-miR160a-3p	GCGTGCAAGGAGCCAAGCATG	(((((..((....(((((((......((((((.(((((((.((((((((((((((..(((...(((((.........)))))))))))))))))))))).))))))).))))))..)))..))))...))....)))))	54	-67.6	0.9
18	26	5'	osa-miR160c-5p_L+1R-1	GTGCCTGGCTCCCTGTATGCC	21	Diff	54.5	24.35	31.3833	23.0833	32.3167	28.9667	57.5793	21.0621	29.2013	20.8359	39.8857	32.4833	Chr8	+	1707568	1707666	ggaatGTGCCTGGCTCCCTGTATGCCactcatctagagcaacaaaCTTCTGCGAGAGGTTgcctatgatggatggcgtgcacggagccaagcatattcc	Y	4	osa-MIR160c,sbi-MIR160c,ttu-MIR160,zma-MIR160c,	osa-MIR160c	ggaatgTGCCTGGCTCCCTGTATGCCActcatctagagcaacaaacttctgcgagaggttgcctatgatggatgGCGTGCACGGAGCCAAGCATAttcc	1	osa-miR160a-5p	TGCCTGGCTCCCTGTATGCCA	(((((((((.(((((((.(((((((((..(((((((.(((((...(((....)))..)))))))).))))..))))))))).))))))).)))))))))	53.5	-60.2	1.1
19	27	5'	osa-miR160d-5p	TGCCTGGCTCCCTGTATGCCA	21	Yes	28.8333	14.85	23.7167	11.75	15.9833	12.6333	30.4625	12.8449	22.0677	10.606	19.7269	14.1671	Chr3	+	32454988	32455129	ggggataTGCCTGGCTCCCTGTATGCCActcgcgtagctgccaaactcagttgaaacaactgccttctcccggcgagattcaggcattgtgttcgtacgtttggctctactgcggatggcgtgcgaggagccaagcatgacc	Y	1	osa-MIR160d,	osa-MIR160d	ggggataTGCCTGGCTCCCTGTATGCCActcgcgtagctgccaaactcagttgaaacaactgccttctcccggcgagattcaggcattgtgttcgtacgtttggctctactgcggatgGCGTGCGAGGAGCCAAGCATGacc	1	osa-miR160a-5p	TGCCTGGCTCCCTGTATGCCA	.((..(((((.(((((((..((((((((..(((((((..(((((((.....((((((((.(((((((((.....))))...))))))))).))))...))))))).)))).)))..))))))))..))))))).))))).))	57	-71.8	0.9
20	28	5'	osa-miR160e-5p	TGCCTGGCTCCCTGTATGCCG	21	Yes	41.6667	15.4333	33.8	7	12.4	8.8	44.0209	13.3495	31.45	6.31847	15.3043	9.86834	Chr7	-	2216768	2216874	gtaggggataTGCCTGGCTCCCTGTATGCCGctcgcatggctgccaacccaatgaactcgatctcgttgttggccgctgcgtacggcgtgcgaggtgccaagcatgg	Y	1	osa-MIR160e,	osa-MIR160e	gtaggggataTGCCTGGCTCCCTGTATGCCGctcgcatggctgccaacccaatgaactcgatctcgttgttggccgctgcgtacgGCGTGCGAGGTGCCAAGCATGgccctctt	0	osa-miR160e-5p	TGCCTGGCTCCCTGTATGCCG	........(((((.((((.((..((((((((..((((..((.((((((..(((((........))))))))))).))))))..))))))))..)).)))).))))).	61.7	-51.6	0.8
21	29	5'	osa-miR160f-5p	TGCCTGGCTCCCTGAATGCCA	21	Yes	102	52	100	12	47	21	107.763	44.9787	93.0472	10.8317	58.0081	23.5495	Chr8	+	24396882	24396981	ggattaacgcTGCCTGGCTCCCTGAATGCCAtccgagaagcgtgccgctgtggccggctgcttcctggttggcaTTGAGGGAGTCATGCAGGGTTtgctc	N	1	osa-MIR160f,	osa-MIR160f	ggattaacgcTGCCTGGCTCCCTGAATGCCAtccgagaagcgtgccgctgtggccggctgcttcctggttgGCATTGAGGGAGTCATGCAGGgtttgctc	1	osa-miR160f-5p	TGCCTGGCTCCCTGAATGCCA	((...(((.((((.(((((((((.(((((((.((..((((((.(((((....).))))))))))..)).))))))).))))))))).)))).)))..)).	61	-60.1	1
22	30	5'	osa-MIR162a-p5	GGGCGCAGTGGTTTATCGATC	21	New	9.5	7.5	10.5	3	8.5	9.5	10.0368	6.48731	9.76996	2.70791	10.4908	10.6533	Chr2	+	23605799	23605969	ggtgatgcctGGGCGCAGTGGTTTATCGATCccttccctgccttgtggcgctgatccaggagcggcgaatttctttgagagggtgttctttttttttcttccttttggtccttgttgcagccaacgacaacgcgggaatcgaTCGATAAACCTCTGCATCCAGttctcgcc	Y	1	osa-MIR162a,	osa-MIR162a	ggtgatgcctgggcgcagtggtttatcgatcccttccctgccttgtggcgctgatccaggagcggcgaatttctttgagagggtgttctttttttttcttccttttggtccttgttgcagccaacgacaacgcgggaatcgaTCGATAAACCTCTGCATCCAGttctcgcc	1	osa-MIR162a-p5	gggcgcagtggtttatcgatc	(((((...((((..((((.((((((((((((..(((((.((.((((((((((........))).((((......(..((((((................))))))..)......)))).)))....)))).)))))))..)))))))))))).))))..))))...)))))	52.6	-71.2	0.8
22	31	3'	osa-miR162a	TCGATAAACCTCTGCATCCAG	21	Yes	421	535.5	861	411.5	374	448.5	444.787	463.194	801.137	371.436	461.597	502.949	Chr2	+	23605799	23605969	ggtgatgcctGGGCGCAGTGGTTTATCGATCccttccctgccttgtggcgctgatccaggagcggcgaatttctttgagagggtgttctttttttttcttccttttggtccttgttgcagccaacgacaacgcgggaatcgaTCGATAAACCTCTGCATCCAGttctcgcc	Y	1	osa-MIR162a,	osa-MIR162a	ggtgatgcctgggcgcagtggtttatcgatcccttccctgccttgtggcgctgatccaggagcggcgaatttctttgagagggtgttctttttttttcttccttttggtccttgttgcagccaacgacaacgcgggaatcgaTCGATAAACCTCTGCATCCAGttctcgcc	1	osa-miR162a	TCGATAAACCTCTGCATCCAG	(((((...((((..((((.((((((((((((..(((((.((.((((((((((........))).((((......(..((((((................))))))..)......)))).)))....)))).)))))))..)))))))))))).))))..))))...)))))	52.6	-71.2	0.8
23	32	5'	osa-MIR162b-p5	GGGCGCAGTGGTTTATCGATC	21	New	6.5	5.5	10.5	3	7.5	9.5	6.86726	4.75736	9.76996	2.70791	9.25662	10.6533	Chr4	+	24405899	24406032	tgggtgatgcctGGGCGCAGTGGTTTATCGATCtcttccctgccttgtgctgctccgatcgatgcccgtgctgattcttgataatatacaacgcaggaatcgaTCGATAAGCCTCTGCATCCAGatctcacttt	Y	1	osa-MIR162b,	osa-MIR162b	tgggtgatgcctgggcgcagtggtttatcgatctcttccctgccttgtgctgctccgatcgatgcccgtgctgattcttgataatatacaacgcaggaatcgaTCGATAAGCCTCTGCATCCAGatctcacttt	1	osa-MIR162b-p5	gggcgcagtggtttatcgatc	..(((((...((((..((((.((((((((((((..((((.(((.(((((....((.(((((..((....)))))))...)).....))))).)))))))..)))))))))))).))))..))))...)))))..	50.7	-53	0.8
23	33	3'	osa-miR162b	TCGATAAGCCTCTGCATCCAG	21	Yes	615	513.5	809	365.5	312	458.5	649.748	444.165	752.752	329.914	385.075	514.163	Chr4	+	24405899	24406032	tgggtgatgcctGGGCGCAGTGGTTTATCGATCtcttccctgccttgtgctgctccgatcgatgcccgtgctgattcttgataatatacaacgcaggaatcgaTCGATAAGCCTCTGCATCCAGatctcacttt	Y	1	osa-MIR162b,	osa-MIR162b	tgggtgatgcctgggcgcagtggtttatcgatctcttccctgccttgtgctgctccgatcgatgcccgtgctgattcttgataatatacaacgcaggaatcgaTCGATAAGCCTCTGCATCCAGatctcacttt	1	osa-miR162b	TCGATAAGCCTCTGCATCCAG	..(((((...((((..((((.((((((((((((..((((.(((.(((((....((.(((((..((....)))))))...)).....))))).)))))))..)))))))))))).))))..))))...)))))..	50.7	-53	0.8
24	34	5'	osa-miR164a	TGGAGAAGCAGGGCACGTGCA	21	Yes	769.667	348.667	1256	92	278.667	184.75	813.154	301.588	1168.67	83.0427	343.935	207.179	Chr7	-	28523341	28523496	gtgagaaggaccgcgtTGGAGAAGCAGGGCACGTGCAtgcatatgttcatcatcatcttcttcctcctcctctagctccagccttgtgtgggttggaagtttagatagaactcgcactgcacgtggtctccttctccatcccggtctttttctcac	Y	1	osa-MIR164a,	osa-MIR164a	gtgagaaggaccgcgtTGGAGAAGCAGGGCACGTGCAtgcatatgttcatcatcatcttcttcctcctcctctagctccagccttgtgtgggttggaagtttagatagaactcgcactgcacgtggtctccttctccatcccggtctttttctcac	1	osa-miR164a	TGGAGAAGCAGGGCACGTGCA	(((((((((((((...((((((((.((..(((((((((((....(((((((......................(((((((((((.....)))))))).)))..))).))))..))).))))))))..)).))))))))...))))))..)))))))	51.9	-66.4	0.8
25	35	5'	osa-miR164b	TGGAGAAGCAGGGCACGTGCA	21	Yes	769.667	348.667	1256	92	278.667	184.75	813.154	301.588	1168.67	83.0427	343.935	207.179	Chr5	-	15896163	15896271	gtgcacggTGGAGAAGCAGGGCACGTGCAttaccatccactcgcctgccggccgccggccgccattgccatggATGGTTCTTCATGTGCCCGTCttctccaccgagcac	Y	1	osa-MIR164b,	osa-MIR164b	gtgcacggTGGAGAAGCAGGGCACGTGCAttaccatccactcgcctgccggccgccggccgccattgccatggatggttcttcatgtgcccgtcttctccaccgagcac	1	osa-miR164a	TGGAGAAGCAGGGCACGTGCA	((((.(((((((((((..(((((((((....((((((((...((.((.(((((...))))).))..))..))))))))....)))))))))..))))))))))).))))	64.2	-68.5	1
26	36	5'	osa-miR164d	TGGAGAAGCAGGGCACGTGCT	21	Yes	144.833	64.6667	242.667	31.1667	39.6667	39.25	153.017	55.9351	225.795	28.1322	48.9572	44.015	Chr2	-	33143567	33143660	caaaccgtgcTGGAGAAGCAGGGCACGTGCTcgacggcggggctggctggccggccggcttgcagCATGTGCGCTCCTTCTCCAGCatggcttc	Y	1	osa-MIR164d,	osa-MIR164d	caaaccgtgcTGGAGAAGCAGGGCACGTGCTcgacggcggggctggctggccggccggcttgcagcatgtgcgctccttctccagcatggcttc	1	osa-miR164d	TGGAGAAGCAGGGCACGTGCT	....((((((((((((((.((.(((((((((((..(((..((((((....)))))).))))).))))))))).)).))))))))))))))....	68.1	-60.7	0.9
27	37	5'	osa-miR164e	TGGAGAAGCAGGGCACGTGAG	21	Yes	23.5	89	51	14.5	48	39.25	24.8278	76.9828	47.4541	13.0883	59.2423	44.015	Chr3	+	10542157	10542288	ttgtgcagggTGGAGAAGCAGGGCACGTGAGcggccatccagtgtagcttcgctgcgcgtccatggcggcgaacgcgcgtgatctggagtttggATGGTCGTTCATGTGTCCGTCTtctccaccgagcactg	Y	1	osa-MIR164e,	osa-MIR164e	ttgtgcagggTGGAGAAGCAGGGCACGTGAGcggccatccagtgtagcttcgctgcgcgtccatggcggcgaacgcgcgtgatctggagtttggatggtcgttcatgtgtccgtcttctccaccgagcactg	1	osa-miR164e	TGGAGAAGCAGGGCACGTGAG	..((((..((((((((((..((((((((((((((((((((((((((((...)))))))...(((((((.....))).))))..........)))))))))))))))))))))..))))))))))..))))..	61.4	-82.7	1
28	38	3'	osa-MIR164f-p3	TGCCCTTCTTCTCCACCGTGC	21	New	2	0	4	1	4	0	2.113	0	3.72189	0.902638	4.93686	0	Chr5	+	15896129	15896389	ttggtgctcggtggagaagacgggcacatgaagaaccatccatggcaatggcggccggcggccggcaggcgagtggatggtaatgcacgTGCCCTGCTTCTCCACCGTGCacggc	Y	2	osa-MIR164f,bdi-MIR164f,	osa-MIR164f	tgaggatggcgaggcgcgcgaggTGGAGAAGCAGGGCACGTGCAttcctagagcttccgtccagctccccggcgggctagctagctcactccgccgccgccgccgccgccgccggcgcgcgcacggctggctggctccggccggctgagatgcatgcacggatgcatgtgcccttcttctccaccgtgcacgcctcgcctgcagcaagga	0	osa-MIR164f-p3	tgcccttcttctccaccgtgc	...((((.(((((((((((..((((((.((....(((((((((.((..((.(((((...))))).)).))..)))))))))....)).))))))..))))))))))).))))...	64.3	-73.9	1
29	39	5'	osa-miR166a-5p	GGAATGTTGTCTGGTTCAAGG	21	Yes	1	1	1.33333	0	0.666667	0.5	1.0565	0.864975	1.24063	0	0.82281	0.560701	Chr10	+	19987135	19987279	tgaagctatttgcttctgagtGGAATGTTGTCTGGTTCAAGGtctcatgcaccttgcggttttgaggatgatttgtgcaaggtttttcattcctctcatccgtgggatcTCGGACCAGGCTTCATTCCCCtcagagatagcttca	Y	1	osa-MIR166a,	osa-MIR166a	tgaagctatttgcttctgagtGGAATGTTGTCTGGTTCAAGGtctcatgcaccttgcggttttgaggatgatttgtgcaaggtttttcattcctctcatccgtgggatcTCGGACCAGGCTTCATTCCCCtcagagatagcttca	1	osa-miR166a-5p	GGAATGTTGTCTGGTTCAAGG	.(((((((((....((((((.((((((..(((((((((.((((((((((.(((....)))...((((((((...............))).))))).....)))))))))).)))))))))..)))))).))))))))))))))).	46.9	-67.3	1
29	40	3'	osa-miR166a-3p	TCGGACCAGGCTTCATTCCCC	21	Yes	34030.1	18608.5	23704.4	16074.7	29201.3	14539.3	35952.9	16095.9	22056.2	14509.6	36040.6	16304.5	Chr10	+	19987135	19987279	tgaagctatttgcttctgagtGGAATGTTGTCTGGTTCAAGGtctcatgcaccttgcggttttgaggatgatttgtgcaaggtttttcattcctctcatccgtgggatcTCGGACCAGGCTTCATTCCCCtcagagatagcttca	Y	1	osa-MIR166a,	osa-MIR166a	tgaagctatttgcttctgagtGGAATGTTGTCTGGTTCAAGGtctcatgcaccttgcggttttgaggatgatttgtgcaaggtttttcattcctctcatccgtgggatcTCGGACCAGGCTTCATTCCCCtcagagatagcttca	1	osa-miR166a-3p	TCGGACCAGGCTTCATTCCCC	.(((((((((....((((((.((((((..(((((((((.((((((((((.(((....)))...((((((((...............))).))))).....)))))))))).)))))))))..)))))).))))))))))))))).	46.9	-67.3	1
30	41	5'	osa-miR166b-5p	GGAATGTTGTCTGGCTCGGGG	21	Yes	77	89	71.8333	107	197.167	73.5	81.3506	76.9828	66.8389	96.5823	243.346	82.4231	Chr6	-	30327084	30327289	gggagccttttcattttgaggGGAATGTTGTCTGGCTCGGGGctacttttaatttctctctcttttgatatcttcttttctcgatctcctagcttgatcttttgatctctcaaatcgatcttaagaaaaagatcagtcaaagagatgagagtagatgtctgtagatcTCGGACCAGGCTTCATTCCCCccaaacagaagggctccc	Y	1	osa-MIR166b,	osa-MIR166b	gggagccttttcattttgaggGGAATGTTGTCTGGCTCGGGGctacttttaatttctctctcttttgatatcttcttttctcgatctcctagcttgatcttttgatctctcaaatcgatcttaagaaaaagatcagtcaaagagatgagagtagatgtctgtagatcTCGGACCAGGCTTCATTCCCCccaaacagaagggctccc	1	osa-miR166b-5p	GGAATGTTGTCTGGCTCGGGG	(((((((((((...((((.((((((((..((((((..(((((((((.....(((((((((((((((((((((((..(((((.((((.........((((....)))).........))))...))))))))))..))).)))))).))))).))))....)))).)))))..))))))..)))))))).))))..)))))))))))	43.2	-87.3	1
30	42	3'	osa-miR166b-3p	TCGGACCAGGCTTCATTCCCC	21	Yes	34030.1	18608.5	23704.4	16074.7	29201.3	14539.3	35952.9	16095.9	22056.2	14509.6	36040.6	16304.5	Chr6	-	30327084	30327289	gggagccttttcattttgaggGGAATGTTGTCTGGCTCGGGGctacttttaatttctctctcttttgatatcttcttttctcgatctcctagcttgatcttttgatctctcaaatcgatcttaagaaaaagatcagtcaaagagatgagagtagatgtctgtagatcTCGGACCAGGCTTCATTCCCCccaaacagaagggctccc	Y	1	osa-MIR166b,	osa-MIR166b	gggagccttttcattttgaggGGAATGTTGTCTGGCTCGGGGctacttttaatttctctctcttttgatatcttcttttctcgatctcctagcttgatcttttgatctctcaaatcgatcttaagaaaaagatcagtcaaagagatgagagtagatgtctgtagatcTCGGACCAGGCTTCATTCCCCccaaacagaagggctccc	1	osa-miR166a-3p	TCGGACCAGGCTTCATTCCCC	(((((((((((...((((.((((((((..((((((..(((((((((.....(((((((((((((((((((((((..(((((.((((.........((((....)))).........))))...))))))))))..))).)))))).))))).))))....)))).)))))..))))))..)))))))).))))..)))))))))))	43.2	-87.3	1
31	43	5'	osa-MIR166c-5p_L-3R+4	ATGTTGTCTGGTCCGAGACCT	21	New	67	51	29.3333	68	42.6667	37	70.7856	44.1137	27.2938	61.3794	52.6599	41.4919	Chr3	+	3487788	3487912	ggcagttgaggggaATGTTGTCTGGTCCGAGACCTaacaccgggcggaatggcggattcagctgcagctaagcaagctaggtggggggttTCGGACCAGGCTTCATTCCCCccaactcaactgtt	Y	2	osa-MIR166c,hvu-MIR166b,	osa-MIR166c	ggcagttgaggGGAATGTTGTCTGGTCCGAGacctaacaccgggcggaatggcggattcagctgcagctaagcaagctaggtggggggttTCGGACCAGGCTTCATTCCCCccaactcaactgtt	1	osa-MIR166c-p5	ATGTTGTCTGGTCCGAGacct	.((((((((((((((((..((((((((((((((((..((((..((.((((.....)))).(((.......)))..))..))))..))))))))))))))))..)))))))).....)))))))).	57.6	-73.4	1
31	44	3'	osa-miR166c-3p	TCGGACCAGGCTTCATTCCCC	21	Yes	34030.1	18608.5	23704.4	16074.7	29201.3	14539.3	35952.9	16095.9	22056.2	14509.6	36040.6	16304.5	Chr3	+	3487788	3487912	ggcagttgaggggaATGTTGTCTGGTCCGAGACCTaacaccgggcggaatggcggattcagctgcagctaagcaagctaggtggggggttTCGGACCAGGCTTCATTCCCCccaactcaactgtt	Y	2	osa-MIR166c,hvu-MIR166b,	osa-MIR166c	ggcagttgaggGGAATGTTGTCTGGTCCGAGacctaacaccgggcggaatggcggattcagctgcagctaagcaagctaggtggggggttTCGGACCAGGCTTCATTCCCCccaactcaactgtt	1	osa-miR166a-3p	TCGGACCAGGCTTCATTCCCC	.((((((((((((((((..((((((((((((((((..((((..((.((((.....)))).(((.......)))..))..))))..))))))))))))))))..)))))))).....)))))))).	57.6	-73.4	1
32	45	5'	osa-miR166d-5p	GGAATGTTGTCTGGCTCGAGG	21	Yes	283	326	275.167	442	427.833	305.5	298.99	281.982	256.035	398.966	528.039	342.588	Chr2	+	26130059	26130183	gaagctttttcactttgaggGGAATGTTGTCTGGCTCGAGGtgcatggagaaacctctgatcgatcaggtttgatctgtagagactgatcTCGGACCAGGCTTCATTCCCCtcaagtaaagctcc	Y	1	osa-MIR166d,	osa-MIR166d	gaagctttttcactttgaggGGAATGTTGTCTGGCTCGAGGtgcatggagaaacctctgatcgatcaggtttgatctgtagagactgatcTCGGACCAGGCTTCATTCCCCtcaagtaaagctcc	1	osa-miR166d-5p	GGAATGTTGTCTGGCTCGAGG	..((((((...((.((((((((((((..((((((..((((((.((.((((....))))((((((......)))))).........))))))))..))))))..))))))))))))))))))))..	48.8	-55.9	0.9
32	46	3'	osa-miR166d-3p	TCGGACCAGGCTTCATTCCCC	21	Yes	34030.1	18608.5	23704.4	16074.7	29201.3	14539.3	35952.9	16095.9	22056.2	14509.6	36040.6	16304.5	Chr2	+	26130059	26130183	gaagctttttcactttgaggGGAATGTTGTCTGGCTCGAGGtgcatggagaaacctctgatcgatcaggtttgatctgtagagactgatcTCGGACCAGGCTTCATTCCCCtcaagtaaagctcc	Y	1	osa-MIR166d,	osa-MIR166d	gaagctttttcactttgaggGGAATGTTGTCTGGCTCGAGGtgcatggagaaacctctgatcgatcaggtttgatctgtagagactgatcTCGGACCAGGCTTCATTCCCCtcaagtaaagctcc	1	osa-miR166a-3p	TCGGACCAGGCTTCATTCCCC	..((((((...((.((((((((((((..((((((..((((((.((.((((....))))((((((......)))))).........))))))))..))))))..))))))))))))))))))))..	48.8	-55.9	0.9
33	47	5'	osa-miR166a-5p	GGAATGTTGTCTGGTTCAAGG	21	Yes	1	1	1.33333	0	0.666667	0.5	1.0565	0.864975	1.24063	0	0.82281	0.560701	Chr3	+	765724	765860	tgtttctgggtGGAATGTTGTCTGGTTCAAGGccccttaggatgtgtgatttttgatggtttatgcattcatcttgatgcgaacatctatctcggatctttgggttcTCGAACCAGGCTTCATTCCCCtcagagata	Y	1	osa-MIR166e,	osa-MIR166e	tgtttctgggtGGAATGTTGTCTGGTTCAAGGccccttaggatgtgtgatttttgatggtttatgcattcatcttgatgcgaacatctatctcggatctttgggttcTCGAACCAGGCTTCATTCCCCtcagagata	1	osa-miR166a-5p	GGAATGTTGTCTGGTTCAAGG	((((((((((.((((((..(((((((((.((..(((...(((((..(((...........)))..))))).....(((.(((.........))).)))...)))..)).)))))))))..)))))).))))))))))	44.5	-58	1
33	48	3'	osa-miR166e-3p	TCGAACCAGGCTTCATTCCCC	21	Yes	77.3976	56.8571	67.5476	35.8333	63.2381	31.7576	81.7707	49.18	62.8512	32.3445	78.0494	35.613	Chr3	+	765724	765860	tgtttctgggtGGAATGTTGTCTGGTTCAAGGccccttaggatgtgtgatttttgatggtttatgcattcatcttgatgcgaacatctatctcggatctttgggttcTCGAACCAGGCTTCATTCCCCtcagagata	Y	1	osa-MIR166e,	osa-MIR166e	tgtttctgggtGGAATGTTGTCTGGTTCAAGGccccttaggatgtgtgatttttgatggtttatgcattcatcttgatgcgaacatctatctcggatctttgggttcTCGAACCAGGCTTCATTCCCCtcagagata	1	osa-miR166e-3p	TCGAACCAGGCTTCATTCCCC	((((((((((.((((((..(((((((((.((..(((...(((((..(((...........)))..))))).....(((.(((.........))).)))...)))..)).)))))))))..)))))).))))))))))	44.5	-58	1
34	49	3'	osa-miR166f	TCGGACCAGGCTTCATTCCCC	21	Yes	34030.1	18608.5	23704.4	16074.7	29201.3	14539.3	35952.9	16095.9	22056.2	14509.6	36040.6	16304.5	Chr10	-	14483290	14483396	cgatcatcttgttgagaggAATGTCGTCTGGCCTGAGATCgtaccacagtggtgggtacacgtggacggtcTCGGACCAGGCTTCATTCCCCtcaacaactcgtcgg	Y	1	osa-MIR166f,	osa-MIR166f	cgatcatcttgttgagaggaatgtcgtctggcctgagatcgtaccacagtggtgggtacacgtggacggtcTCGGACCAGGCTTCATTCCCCtcaacaactcgtcgg	1	osa-miR166a-3p	TCGGACCAGGCTTCATTCCCC	((((....((((((((.((((((..((((((.((((((((((.((((.(((.......))))))))))))))))).))))))..)))))).))))))))...)))).	56.1	-59.8	1
35	50	3'	osa-miR166g-3p_L+2R-2	TCTCGGACCAGGCTTCATTCC	21	Diff	4670.95	1952.97	4177.83	893.564	2860.87	1332.11	4934.86	1689.27	3887.36	806.565	3530.93	1493.83	Chr12	+	18329367	18329511	agcatggtgtctggaatggaggctgatccaagatcattgcttggtgcaaaatactagggcattgttgtaagtgccattagttcttttttgtttccgagtttgttatcgaggaTCTCGGACCAGGCTTCATTCCtcacaccgtgct	Y	1	osa-MIR166g,	osa-MIR166g	agcatggtgtctggAATGGAGGCTGATCCAAGATCattgcttggtgcaaaatactagggcattgttgtaagtgccattagttcttttttgtttccgagtttgttatcgaggatcTCGGACCAGGCTTCATTCCTCacaccgtgct	1	osa-miR166g-3p	TCGGACCAGGCTTCATTCCTC	((((((((((..(((((((((.(((.(((.(((((...((((((.((((((.(((((((((((......)))))).)))))....))))))..))))))(((....))).))))).))).))).)))))))))..))))))))))	45.5	-69.2	1
36	51	5'	osa-miR166h-5p	GGAATGTTGGCTGGCTCGAGG	21	Yes	74.5	38.5	68	7	47	48.5	78.7094	33.3015	63.2721	6.31847	58.0081	54.388	Chr2	-	32435174	32435292	ggtggcttgtggGGAATGTTGGCTGGCTCGAGGtatccacatcttaattcctctccggcgatcgagccggctcgggcgtgtggaagcgTCGGACCAGGCTTCATTCCTCgcaagccgat	Y	1	osa-MIR166h,	osa-MIR166h	ggtggcttgtggGGAATGTTGGCTGGCTCGAGGtatccacatcttaattcctctccggcgatcgagccggctcgggcgtgtggaagcgTCGGACCAGGCTTCATTCCTCgcaagccgat	1	osa-miR166h-5p	GGAATGTTGGCTGGCTCGAGG	..((((((((((((((((..((((((..(((.(..(((((((......(((...(((((......)))))...))).)))))))..).)))..))).))).))))))))))))))))..	60.5	-64.7	0.9
36	52	3'	osa-miR166h-3p	TCGGACCAGGCTTCATTCCTC	21	Yes	2158.61	1055.64	1740.42	585.697	1186.69	811.043	2280.57	913.102	1619.42	528.672	1464.63	909.506	Chr2	-	32435174	32435292	ggtggcttgtggGGAATGTTGGCTGGCTCGAGGtatccacatcttaattcctctccggcgatcgagccggctcgggcgtgtggaagcgTCGGACCAGGCTTCATTCCTCgcaagccgat	Y	1	osa-MIR166h,	osa-MIR166h	ggtggcttgtggGGAATGTTGGCTGGCTCGAGGtatccacatcttaattcctctccggcgatcgagccggctcgggcgtgtggaagcgTCGGACCAGGCTTCATTCCTCgcaagccgat	1	osa-miR166g-3p	TCGGACCAGGCTTCATTCCTC	..((((((((((((((((..((((((..(((.(..(((((((......(((...(((((......)))))...))).)))))))..).)))..))).))).))))))))))))))))..	60.5	-64.7	0.9
37	53	5'	osa-miR166i-5p	AATGCAGTTTGATCCAAGATC	21	Yes	0	1	0	0	0	0	0	0.864975	0	0	0	0	Chr3	+	25294953	25295097	agataggtgtttggAATGCAGTTTGATCCAAGATCtgcctatatatatggtgtgtatatcatatcttgtgatatgggggatatgcaacaggtgtgtgacaggggtaggtagaTCTCGGATCAGGCTTCATTCCtcacaccaatac	Y	2	osa-MIR166i,osa-MIR166j,	osa-MIR166i	agataggtgtttggAATGCAGTTTGATCCAAGATCtgcctatatatatggtgtgtatatcatatcttgtgatatgggggatatgcaacaggtgtgtgacaggggtaggtagatcTCGGATCAGGCTTCATTCCTCacacc	0	osa-miR166i-5p	AATGCAGTTTGATCCAAGATC	.....(((((..((((((.((..((((((.((((((((((((((((((.((.(((((((((((((....)))))....))))))))))..)))))).......)))))))))))).))))))..)).))))))..))))).....	42.8	-63.5	1
37	54	3'	osa-miR166i-3p_L+2R-2	TCTCGGATCAGGCTTCATTCC	21	Diff	72.4821	34.8571	130.044	14.881	73.7381	19.4242	76.5775	30.1506	121.003	13.4321	91.0087	21.7824	Chr3	+	25294953	25295097	agataggtgtttggAATGCAGTTTGATCCAAGATCtgcctatatatatggtgtgtatatcatatcttgtgatatgggggatatgcaacaggtgtgtgacaggggtaggtagaTCTCGGATCAGGCTTCATTCCtcacaccaatac	Y	2	osa-MIR166i,osa-MIR166j,	osa-MIR166i	agataggtgtttggAATGCAGTTTGATCCAAGATCtgcctatatatatggtgtgtatatcatatcttgtgatatgggggatatgcaacaggtgtgtgacaggggtaggtagatcTCGGATCAGGCTTCATTCCTCacacc	0	osa-miR166i-3p	TCGGATCAGGCTTCATTCCTC	.....(((((..((((((.((..((((((.((((((((((((((((((.((.(((((((((((((....)))))....))))))))))..)))))).......)))))))))))).))))))..)).))))))..))))).....	42.8	-63.5	1
38	55	5'	osa-miR166j-5p	GAATGACGTCCGGTCTGAAGA	21	Yes	417	361	490	209	324	380	440.561	312.256	455.931	188.651	399.886	426.133	Chr3	-	30392782	30392881	tgatccatggctgttgagagGAATGACGTCCGGTCTGAAGAtcgccgtccccaggcggtggctTCGGACCAGGCTTCATTCCCCatgactcatggaaccc	Y	1	osa-MIR166n,	osa-MIR166j	tgatccatggctgttgagagGAATGACGTCCGGTCTGAAGAtcgccgtccccaggcggtggctTCGGACCAGGCTTCATTCCCCatgactcatggaaccc	1	osa-miR166n-5p	GAATGACGTCCGGTCTGAAGA	...(((((((..(((....(((((((.(((.(((((((((.((((((((....))))))))))))))))).))).)))))))....))))))))))....	59	-50.7	0.9
38	56	3'	osa-miR166j-3p	TCGGACCAGGCTTCATTCCCC	21	Yes	34030.1	18608.5	23704.4	16074.7	29201.3	14539.3	35952.9	16095.9	22056.2	14509.6	36040.6	16304.5	Chr3	-	30392782	30392881	tgatccatggctgttgagagGAATGACGTCCGGTCTGAAGAtcgccgtccccaggcggtggctTCGGACCAGGCTTCATTCCCCatgactcatggaaccc	Y	1	osa-MIR166n,	osa-MIR166j	tgatccatggctgttgagagGAATGACGTCCGGTCTGAAGAtcgccgtccccaggcggtggctTCGGACCAGGCTTCATTCCCCatgactcatggaaccc	1	osa-miR166a-3p	TCGGACCAGGCTTCATTCCCC	...(((((((..(((....(((((((.(((.(((((((((.((((((((....))))))))))))))))).))).)))))))....))))))))))....	59	-50.7	0.9
39	57	5'	osa-miR166k-5p	GGTTTGTTGTCTGGCTCGAGG	21	Yes	23.5	8.5	18	7	12	8.5	24.8278	7.35229	16.7485	6.31847	14.8106	9.53192	Chr2	-	32435003	32435129	attaggttaaggGGTTTGTTGTCTGGCTCGAGGcatccgggactccggtttctcctttcctactggaggcgcctaatttccggcgagctcggagccTCGGACCAGGCTTCAATCCCTttaaccatgc	Y	1	osa-MIR166k,	osa-MIR166k	attaggttaaggGGTTTGTTGTCTGGCTCGAGGcatccgggactccggtttctcctttcctactggaggcgcctaatttccggcgagctcggagccTCGGACCAGGCTTCAATCCCTttaaccatgc	1	osa-miR166k-5p	GGTTTGTTGTCTGGCTCGAGG	....((((((((((.(((..((((((..((((((.((((((.(((((((............))))))).((((........))))..))))))))))))..))))))..))).))))))))))....	55.9	-69.2	1
39	58	3'	osa-miR166k-3p	TCGGACCAGGCTTCAATCCCT	21	Yes	1266.49	765.606	1254.38	524.739	685.091	438.716	1338.05	662.23	1167.16	473.649	845.55	491.977	Chr2	-	32435003	32435129	attaggttaaggGGTTTGTTGTCTGGCTCGAGGcatccgggactccggtttctcctttcctactggaggcgcctaatttccggcgagctcggagccTCGGACCAGGCTTCAATCCCTttaaccatgc	Y	1	osa-MIR166k,	osa-MIR166k	attaggttaaggGGTTTGTTGTCTGGCTCGAGGcatccgggactccggtttctcctttcctactggaggcgcctaatttccggcgagctcggagccTCGGACCAGGCTTCAATCCCTttaaccatgc	1	osa-miR166k-3p	TCGGACCAGGCTTCAATCCCT	....((((((((((.(((..((((((..((((((.((((((.(((((((............))))))).((((........))))..))))))))))))..))))))..))).))))))))))....	55.9	-69.2	1
40	59	3'	osa-miR166l-3p	TCGGACCAGGCTTCAATCCCT	21	Yes	1266.49	765.606	1254.38	524.739	685.091	438.716	1338.05	662.23	1167.16	473.649	845.55	491.977	Chr9	+	16951817	16951933	gttaggttaaggggaTTGTTGTCTGGTTCAAGGTCTccacattgtgcaaaatgttcattcatggaggcacaggatgcttggtgatcTCGGACCAGGCTTCAATCCCTttaaccagca	Y	1	osa-MIR166l,	osa-MIR166l	gttaggttaaggGGATTGTTGTCTGGTTCAAGGtctccacattgtgcaaaatgttcattcatggaggcacaggatgcttggtgatcTCGGACCAGGCTTCAATCCCTttaaccagca	1	osa-miR166k-3p	TCGGACCAGGCTTCAATCCCT	(((.((((((((((((((..(((((((((.(((((.(((((((((((...(((......)))....)))))..)))..))).))))).)))))))))..))))))))))))))))).	47	-59.4	1.1
41	60	3'	osa-miR166m_R-1	TCGGACCAGGCTTCATTCCC	20	Diff	261.549	141.699	245.29	119.502	201.966	140.898	276.327	122.566	228.235	107.867	249.269	158.003	Chr8	+	23045356	23045555	ctctgctttggtggttggctgatgttctcggttaaggggtttgttgtctggttcaaggcctcctgctgtcctacatcacattttttTTTCTTTGTTCTGAATTtctgatggatgtgtgtgtgcatgatgcatggctggtggtgaccTCGGACCAGGCTTCATTCCCtttaaccagcatttgcgttaataccatcaggcat	Y	1	osa-MIR166m,	osa-MIR166m	ctctgctttggtggttggctgatgttctcggttaaggggtttgttgtctggttcaaggcctcctgctgtcctacatcacatttttttttctttgttctgaatttctgatggatgtgtgtgtgcatgatgcatggctggtggtgaccTCGGACCAGGCTTCATTCCCTttaaccagcatttgcgttaataccatcaggcat	1	osa-miR166m	TCGGACCAGGCTTCATTCCCT	...(((.((((((((..((..(((((...((((((((((..((..(((((((((.(((((.((.(((....((((((.((((.....(((........))).....))))))))))...((((.....))))))).)).))...))).)))))))))..))..)))))))))))))))..))......))))))))))).	46.5	-76.5	0.8
42	61	5'	osa-miR167a-5p_R-1	TGAAGCTGCCAGCATGATCT	20	Diff	98.8	32.3	68.1	24.6	15.7	29.2	104.382	27.9387	63.3652	22.2049	19.3772	32.745	Chr12	+	25476808	25476948	tagtgtgaatgagTGAAGCTGCCAGCATGATCTagctctgattaatcggcactgttggcgtacagtcgattgactaatcgtcagatctgtgtgtgtaaatcactgttagATCATGCATGACAGCCTCATTtcttcacactg	Y	1	osa-MIR167a,	osa-MIR167a	tagtgtgaatgagTGAAGCTGCCAGCATGATCTAgctctgattaatcggcactgttggcgtacagtcgattgactaatcgtcagatctgtgtgtgtaaatcactgttagATCATGCATGACAGCCTCATTTcttcacactg	1	osa-miR167a-5p	TGAAGCTGCCAGCATGATCTA	(((((((((..(((((.((((.((((((((((((((..(((((.((..((((..((((((...((((....))))...))))))....))))..)).)))))..)))))))))))).)).)))).)))))..)))))))))	44	-65	1
42	62	3'	osa-miR167a-3p_R-1	ATCATGCATGACAGCCTCATT	21	Diff	10	3	1	0	1	1	10.565	2.59493	0.930472	0	1.23422	1.1214	Chr12	+	25476808	25476948	tagtgtgaatgagTGAAGCTGCCAGCATGATCTagctctgattaatcggcactgttggcgtacagtcgattgactaatcgtcagatctgtgtgtgtaaatcactgttagATCATGCATGACAGCCTCATTtcttcacactg	Y	1	osa-MIR167a,	osa-MIR167a	tagtgtgaatgagTGAAGCTGCCAGCATGATCTAgctctgattaatcggcactgttggcgtacagtcgattgactaatcgtcagatctgtgtgtgtaaatcactgttagATCATGCATGACAGCCTCATTTcttcacactg	1	osa-miR167a-3p	ATCATGCATGACAGCCTCATTT	(((((((((..(((((.((((.((((((((((((((..(((((.((..((((..((((((...((((....))))...))))))....))))..)).)))))..)))))))))))).)).)))).)))))..)))))))))	44	-65	1
43	63	5'	osa-miR167b_R-1	TGAAGCTGCCAGCATGATCT	20	Diff	98.8	32.3	68.1	24.6	15.7	29.2	104.382	27.9387	63.3652	22.2049	19.3772	32.745	Chr3	-	30546928	30547090	gtgcccaagagaaagcgTGAAGCTGCCAGCATGATCTaacttgcagacaagaaatcagctcagctcgctggtttcgaacaggaaggcggctagctgaggcttcttctgagtacgtgatggttagATCATGCTGTGACAGTTTCACTccttccctgttgggcac	Y	1	osa-MIR167b,	osa-MIR167b	gtgcccaagagaaagcgTGAAGCTGCCAGCATGATCTAacttgcagacaagaaatcagctcagctcgctggtttcgaacaggaaggcggctagctgaggcttcttctgagtacgtgatggttagatcatgctgtgacagtttcactccttccctgttgggcac	1	osa-miR167a-5p	TGAAGCTGCCAGCATGATCTA	((((((((.((.(((.(((((((((.(((((((((((((((..((((.(((...((((((.(((.((((..((((.....)))))))))))))))))..)))..))))..........)))))))))))))))...)))))))))..)))..)).))))))))	51.5	-77.5	0.9
44	64	5'	osa-miR167c-5p_R-1	TGAAGCTGCCAGCATGATCT	20	Diff	98.8	32.3	68.1	24.6	15.7	29.2	104.382	27.9387	63.3652	22.2049	19.3772	32.745	Chr3	+	33130619	33130781	tgtccaagggaacgagTGAAGCTGCCAGCATGATCTagctctgaatgatcaacaagatgtgctcccacactgccttcctgtggatcttgagctgttgctagTCTTGTGGTCATGCCTTGCTAggtcatgctgcggcagcctcacttcttcccattgttgggca	Y	1	osa-MIR167c,	osa-MIR167c	tgtccaagggaacgagTGAAGCTGCCAGCATGATCTAgctctgaatgatcaacaagatgtgctcccacactgccttcctgtggatcttgagctgttgctagtcttgtggtcatgccttgctaGGTCATGCTGCGGCAGCCTCACTtcttcccattgttgggca	1	osa-miR167a-5p	TGAAGCTGCCAGCATGATCTA	.(((((((((((..(((((.(((((((((((((((((((.....(((((((.((((((......(((((.........)))))......(((....))).))))))))))))).....)))))))))))))..)))))).)))))..)))))....)))))).	52.1	-80.4	0.9
45	65	5'	osa-miR167d-5p_R+1	TGAAGCTGCCAGCATGATCTGA	22	Diff	726.219	723.929	756.25	980.438	540.719	738.014	767.251	626.18	703.67	884.981	667.364	827.611	Chr7	-	4166295	4166404	cattaggagcTGAAGCTGCCAGCATGATCTGAtgagtgcttattaggtgagggcagaattgactgccaaaacaaagatcaGATCATGCTGTGCAGTTTCATCtgcttgtg	Y	1	osa-MIR167d,	osa-MIR167d	cattaggagcTGAAGCTGCCAGCATGATCTGatgagtgcttattaggtgagggcagaattgactgccaaaacaaagatcaGATCATGCTGTGCAGTTTCATCtgcttgtg	1	osa-miR167d-5p	TGAAGCTGCCAGCATGATCTG	((..((.((.(((((((((((((((((((((((....(((.....)))...(((((......))))).........)))))))))))))).))))))))).)).))..))	45.5	-51.2	1
45	66	3'	osa-miR167d-3p	GATCATGCTGTGCAGTTTCATC	22	Yes	4	14	5	7	1	7	4.22601	12.1097	4.65236	6.31847	1.23422	7.84982	Chr7	-	4166295	4166404	cattaggagcTGAAGCTGCCAGCATGATCTGAtgagtgcttattaggtgagggcagaattgactgccaaaacaaagatcaGATCATGCTGTGCAGTTTCATCtgcttgtg	Y	1	osa-MIR167d,	osa-MIR167d	cattaggagcTGAAGCTGCCAGCATGATCTGatgagtgcttattaggtgagggcagaattgactgccaaaacaaagatcaGATCATGCTGTGCAGTTTCATCtgcttgtg	1	osa-miR167d-3p	GATCATGCTGTGCAGTTTCATC	((..((.((.(((((((((((((((((((((((....(((.....)))...(((((......))))).........)))))))))))))).))))))))).)).))..))	45.5	-51.2	1
46	67	5'	osa-miR167d-5p_R+1	TGAAGCTGCCAGCATGATCTGG	22	Diff	726.219	723.929	756.25	980.438	540.719	738.014	767.251	626.18	703.67	884.981	667.364	827.611	Chr2	-	3742241	3742513	tgtgagagaaTGAAGCTGCCAGCATGATCTGGttgtcaggcatgagccaaatctatccatggtgttggtggtactgaaattaccgcgttttcgaggtttttcgtcgtgtcaacttgcgaagggaattacgggttcttgatgagcattggtgataggaggtgtgggcttggttagtagaggtagaattatgattgttcttgtgagtttcagtaagaggtgggagtgattggaatttggctccatcAGATCATGTTGCAGCTTCACTctctcacc	Y	1	osa-MIR167e,	osa-MIR167e	tgtgagagaaTGAAGCTGCCAGCATGATCTGgttgtcaggcatgagccaaatctatccatggtgttggtggtactgaaattaccgcgttttcgaggtttttcgtcgtgtcaacttgcgaagggaattacgggttcttgatgagcattggtgataggaggtgtgggcttggttagtagaggtagaattatgattgttcttgtgagtttcagtaagaggtgggagtgattggaatttggctccatcAGATCATGTTGCAGCTTCACTctctcacc	1	osa-miR167d-5p	TGAAGCTGCCAGCATGATCTG	.((((((((.((((((((.((((((((((((((((.....)).((((((((((((..(((...........((((((((((.(((((..(((....(..(((((.((....))..)))))..).(((((..((((.....))))....))))).)))..))))).................(((((.......)))))....))))))))))..........)))..))).))))))))).)))))))))))))))))))))).)))))))).	45.8	-98.5	0.8
46	68	3'	osa-miR167e-3p	AGATCATGTTGCAGCTTCACT	21	Yes	15	14.5	15	6.5	2.5	6	15.8475	12.5421	13.9571	5.86715	3.08554	6.72842	Chr2	-	3742241	3742513	tgtgagagaaTGAAGCTGCCAGCATGATCTGGttgtcaggcatgagccaaatctatccatggtgttggtggtactgaaattaccgcgttttcgaggtttttcgtcgtgtcaacttgcgaagggaattacgggttcttgatgagcattggtgataggaggtgtgggcttggttagtagaggtagaattatgattgttcttgtgagtttcagtaagaggtgggagtgattggaatttggctccatcAGATCATGTTGCAGCTTCACTctctcacc	Y	1	osa-MIR167e,	osa-MIR167e	tgtgagagaaTGAAGCTGCCAGCATGATCTGgttgtcaggcatgagccaaatctatccatggtgttggtggtactgaaattaccgcgttttcgaggtttttcgtcgtgtcaacttgcgaagggaattacgggttcttgatgagcattggtgataggaggtgtgggcttggttagtagaggtagaattatgattgttcttgtgagtttcagtaagaggtgggagtgattggaatttggctccatcAGATCATGTTGCAGCTTCACTctctcacc	1	osa-miR167e-3p	AGATCATGTTGCAGCTTCACT	.((((((((.((((((((.((((((((((((((((.....)).((((((((((((..(((...........((((((((((.(((((..(((....(..(((((.((....))..)))))..).(((((..((((.....))))....))))).)))..))))).................(((((.......)))))....))))))))))..........)))..))).))))))))).)))))))))))))))))))))).)))))))).	45.8	-98.5	0.8
47	69	5'	osa-miR167d-5p_R+1	TGAAGCTGCCAGCATGATCTGA	22	Diff	726.219	723.929	756.25	980.438	540.719	738.014	767.251	626.18	703.67	884.981	667.364	827.611	Chr10	-	14723044	14723156	cacaagtggaTGAAGCTGCCAGCATGATCTGAtcacagtagttctctagctgatgatgatttacaaaacctagagacatgcatcAGATCATCTGGCAGTTTCATCttctcatg	Y	1	osa-MIR167f,	osa-MIR167f	cacaagtggaTGAAGCTGCCAGCATGATCTGatcacagtagttctctagctgatgatgatttacaaaacctagagacatgcatcagatcatctggcagtttcatcttctcatg	1	osa-miR167d-5p	TGAAGCTGCCAGCATGATCTG	....((..((((((((((((((.((((((((((....(((..(((((((....((........))....)))))))..)))))))))))))))))))))))))))..))....	42.5	-50	1
47	70	3'	osa-MIR167f-p3	AGATCATCTGGCAGTTTCATC	21	New	24	36	6	103	15	66.5	25.356	31.1391	5.58283	92.9717	18.5132	74.5733	Chr10	-	14723044	14723156	cacaagtggaTGAAGCTGCCAGCATGATCTGAtcacagtagttctctagctgatgatgatttacaaaacctagagacatgcatcAGATCATCTGGCAGTTTCATCttctcatg	Y	1	osa-MIR167f,	osa-MIR167f	cacaagtggaTGAAGCTGCCAGCATGATCTGatcacagtagttctctagctgatgatgatttacaaaacctagagacatgcatcagatcatctggcagtttcatcttctcatg	1	osa-MIR167f-p3	agatcatctggcagtttcatc	....((..((((((((((((((.((((((((((....(((..(((((((....((........))....)))))))..)))))))))))))))))))))))))))..))....	42.5	-50	1
48	71	5'	osa-miR167g-5p_R+1	TGAAGCTGCCAGCATGATCTGA	22	Diff	726.219	723.929	756.25	980.438	540.719	738.014	767.251	626.18	703.67	884.981	667.364	827.611	Chr3	+	3347682	3347763	cataagcaggTGAAGCTGCCAGCATGATCTGAaagcatctcaaaccagcgatcAGATCATCCGGCAGCTTCATCttctcatg	Y	1	osa-MIR167g,	osa-MIR167g	cataagcaggTGAAGCTGCCAGCATGATCTGaaagcatctcaaaccagcgatcagatcatccggcagcttcatcttctcatg	1	osa-miR167d-5p	TGAAGCTGCCAGCATGATCTG	(((.((.(((((((((((((...(((((((((..((...........))..)))))))))..))))))))))))).)).)))	48.8	-39.3	1
48	72	3'	osa-MIR167g-p3	AGATCATCCGGCAGCTTCATC	21	New	50	48	55	125	73	142.5	52.8251	41.5188	51.176	112.83	90.0977	159.8	Chr3	+	3347682	3347763	cataagcaggTGAAGCTGCCAGCATGATCTGAaagcatctcaaaccagcgatcAGATCATCCGGCAGCTTCATCttctcatg	Y	1	osa-MIR167g,	osa-MIR167g	cataagcaggTGAAGCTGCCAGCATGATCTGaaagcatctcaaaccagcgatcagatcatccggcagcttcatcttctcatg	1	osa-MIR167g-p3	agatcatccggcagcttcatc	(((.((.(((((((((((((...(((((((((..((...........))..)))))))))..))))))))))))).)).)))	48.8	-39.3	1
49	73	5'	osa-miR167h-5p_R+1	TGAAGCTGCCAGCATGATCTGA	22	Diff	726.219	723.929	756.25	980.438	540.719	738.014	767.251	626.18	703.67	884.981	667.364	827.611	Chr12	+	25480618	25480737	cacaagttggTGAAGCTGCCAGCATGATCTGAtgatgatgatgatccacctctctcatctgtgttcttgattaattacggatcaatcgatcAGGTCATGCTGTAGTTTCATCtgctggtt	Y	1	osa-MIR167h,	osa-MIR167h	cacaagttggTGAAGCTGCCAGCATGATCTGatgatgatgatgatccacctctctcatctgtgttcttgattaattacggatcaatcgatcAGGTCATGCTGTAGTTTCATCtgctggtt	1	osa-miR167d-5p	TGAAGCTGCCAGCATGATCTG	.((.((..((((((((((.(((((((((((((((((((.((.((......))))))))).......((((((.......))))))...))))))))))))))))))))))))..)).)).	43.3	-47	0.9
49	74	3'	osa-miR167h-3p	AGGTCATGCTGTAGTTTCATC	21	Yes	19	31	31	183	31	62	20.0735	26.8142	28.8446	165.183	38.2607	69.527	Chr12	+	25480618	25480737	cacaagttggTGAAGCTGCCAGCATGATCTGAtgatgatgatgatccacctctctcatctgtgttcttgattaattacggatcaatcgatcAGGTCATGCTGTAGTTTCATCtgctggtt	Y	1	osa-MIR167h,	osa-MIR167h	cacaagttggTGAAGCTGCCAGCATGATCTGatgatgatgatgatccacctctctcatctgtgttcttgattaattacggatcaatcgatcAGGTCATGCTGTAGTTTCATCtgctggtt	1	osa-miR167h-3p	AGGTCATGCTGTAGTTTCATC	.((.((..((((((((((.(((((((((((((((((((.((.((......))))))))).......((((((.......))))))...))))))))))))))))))))))))..)).)).	43.3	-47	0.9
50	75	5'	osa-miR167i-5p_R+1	TGAAGCTGCCAGCATGATCTGG	22	Diff	726.219	723.929	756.25	980.438	540.719	738.014	767.251	626.18	703.67	884.981	667.364	827.611	Chr6	+	27674749	27674949	tgtgagaggcTGAAGCTGCCAGCATGATCTGGtccatgagttgcactgctgaatatattgaattcagccaggagctgctactgcagttctgatctcgatctgcattcgttgttctgagctatgtatggatttgatcggtttgaaggcatccatgtctttaatttcatcgatcAGATCATGTTGCAGCTTCACTctctcact	Y	1	osa-MIR167i,	osa-MIR167i	tgtgagaggcTGAAGCTGCCAGCATGATCTGgtccatgagttgcactgctgaatatattgaattcagccaggagctgctactgcagttctgatctcgatctgcattcgttgttctgagctatgtatggatttgatcggtttgaaggcatccatgtctttaatttcatcgatcAGATCATGTTGCAGCTTCACTctctcact	1	osa-miR167d-5p	TGAAGCTGCCAGCATGATCTG	.(((((((..((((((((.(((((((((((((((.(((((.......(((((((.......)))))))..((((((((....))))))))((((..(((((((((..(((......))).))))..))))).))))...(((((((((....))))))))).))))).)))))))))))))))))))))))..))))))).	44.8	-90.7	1
50	76	3'	osa-miR167i-3p	AGATCATGTTGCAGCTTCACT	21	Yes	15	14.5	15	6.5	2.5	6	15.8475	12.5421	13.9571	5.86715	3.08554	6.72842	Chr6	+	27674749	27674949	tgtgagaggcTGAAGCTGCCAGCATGATCTGGtccatgagttgcactgctgaatatattgaattcagccaggagctgctactgcagttctgatctcgatctgcattcgttgttctgagctatgtatggatttgatcggtttgaaggcatccatgtctttaatttcatcgatcAGATCATGTTGCAGCTTCACTctctcact	Y	1	osa-MIR167i,	osa-MIR167i	tgtgagaggcTGAAGCTGCCAGCATGATCTGgtccatgagttgcactgctgaatatattgaattcagccaggagctgctactgcagttctgatctcgatctgcattcgttgttctgagctatgtatggatttgatcggtttgaaggcatccatgtctttaatttcatcgatcAGATCATGTTGCAGCTTCACTctctcact	1	osa-miR167e-3p	AGATCATGTTGCAGCTTCACT	.(((((((..((((((((.(((((((((((((((.(((((.......(((((((.......)))))))..((((((((....))))))))((((..(((((((((..(((......))).))))..))))).))))...(((((((((....))))))))).))))).)))))))))))))))))))))))..))))))).	44.8	-90.7	1
51	77	5'	osa-miR167j-5p_R+1	TGAAGCTGCCAGCATGATCTGA	22	Diff	726.219	723.929	756.25	980.438	540.719	738.014	767.251	626.18	703.67	884.981	667.364	827.611	Chr1	-	32686068	32686227	ttgtgatgtgtgcaccttaagcagcTGAAGCTGCCAGCATGATCTGAtcttttgcgatctctttttttatctgaataagttgatggaaatattgggttcctaagattcAGATCGTGCTGCGCAGTTTCATCtgctaatcgatgcactacactgtgaattt	Y	1	osa-MIR167j,	osa-MIR167j	ttgtgatgtgtgcaccttaagcagcTGAAGCTGCCAGCATGATCTGatcttttgcgatctctttttttatctgaataagttgatggaaatattgggttcctaagattcagatcgtgctgcgcagtttcatctgctaatcgatgcactacactgtgaattt	1	osa-miR167d-5p	TGAAGCTGCCAGCATGATCTG	(..(..((((((((.....(((((.((((((((((((((((((((((((((....((.(((..(((..(((..........)))..)))....))).))..)))).))))))))))))).))))))))).)))))......))))).)))..)..)....	40.6	-63.7	1
52	78	5'	osa-miR168a-5p	TCGCTTGGTGCAGATCGGGAC	21	Yes	30568	30542.5	23637	32589	38421	39945.5	32295.1	26418.5	21993.6	29416.1	47419.8	44795	Chr2	-	1553146	1553246	cgccgccgcctcgggcTCGCTTGGTGCAGATCGGGACccgccgccgccgctgccggggccggatCCCGCCTTGCACCAAGTGAATcggagccggcgtagcg	Y	6	osa-MIR168a,hvu-MIR168,sof-MIR168a,ssp-MIR168a,zma-MIR168a,zma-MIR168b,	osa-MIR168a	cgcctcgggcTCGCTTGGTGCAGATCGGGACccgccgccgccgctgccggggccgGATCCCGCCTTGCACCAAGTGAATcggagccg	0	osa-miR168a-5p	TCGCTTGGTGCAGATCGGGAC	((((((((.(((.(..(((((((((((((..(((((.(((..(((.(((....))))))))).)))))..)))))))))))))..).))).)))))..)))	76.2	-64.3	0.8
52	79	3'	osa-miR168a-3p_L-3	CCCGCCTTGCACCAAGTGAAT	21	Diff	8409	11835	1214	2701	10987	13417	8884.12	10237	1129.59	2438.03	13560.3	15045.9	Chr2	-	1553146	1553246	cgccgccgcctcgggcTCGCTTGGTGCAGATCGGGACccgccgccgccgctgccggggccggatCCCGCCTTGCACCAAGTGAATcggagccggcgtagcg	Y	6	osa-MIR168a,hvu-MIR168,sof-MIR168a,ssp-MIR168a,zma-MIR168a,zma-MIR168b,	osa-MIR168a	cgcctcgggcTCGCTTGGTGCAGATCGGGACccgccgccgccgctgccggggccgGATCCCGCCTTGCACCAAGTGAATcggagccg	0	osa-miR168a-3p	GATCCCGCCTTGCACCAAGTGAAT	((((((((.(((.(..(((((((((((((..(((((.(((..(((.(((....))))))))).)))))..)))))))))))))..).))).)))))..)))	76.2	-64.3	0.8
53	80	5'	osa-MIR169a-p5	ATCGGAGGCCATGGTGCAGCC	21	New	69.6667	76	69.3333	83	102.417	84.0833	73.6029	65.7381	64.5127	74.919	126.404	94.2913	Chr1	+	8729104	8729276	cgccggcggcctgacattgggATCGGAGGCCATGGTGCAGCCaaggatgacttgccgatcgatcgatctatctatgaagctaagctagctggccatggatccatccatcaattggcaagttgttcttggCTACATCTTGGCCCCTGCTCCtcatgtaaggccggcctgtggcg	Y	1	osa-MIR169a,	osa-MIR169a	cgccggcggcctgacattgggatcggaggccatggtgCAGCCAAGGATGACTTGCCGAtcgatcgatctatctatgaagctaagctagctggccatggatccatccatcaattggcaagttgttcttggctacatcttggcccctgctcctcatgtaaggccggcctgtggcg	1	osa-MIR169a-p5	atcggaggccatggtgCAGCC	((((((((((((.((((..(((.(((.(((((.((((.(((((((((..((((((((((.(((.(((..(((((((.(((((...)))))...)))))))..))).))).))))))))))..))))))))).)))).))))).))).)))..)))).)))))).))...))))	56.6	-97.8	1
53	81	3'	osa-MIR169a-p3	CTACATCTTGGCCCCTGCTCC	21	New	60	58	46	55	201	81	63.3901	50.1686	42.8017	49.6451	248.077	90.8336	Chr1	+	8729104	8729276	cgccggcggcctgacattgggATCGGAGGCCATGGTGCAGCCaaggatgacttgccgatcgatcgatctatctatgaagctaagctagctggccatggatccatccatcaattggcaagttgttcttggCTACATCTTGGCCCCTGCTCCtcatgtaaggccggcctgtggcg	Y	1	osa-MIR169a,	osa-MIR169a	cgccggcggcctgacattgggatcggaggccatggtgCAGCCAAGGATGACTTGCCGAtcgatcgatctatctatgaagctaagctagctggccatggatccatccatcaattggcaagttgttcttggctacatcttggcccctgctcctcatgtaaggccggcctgtggcg	1	osa-MIR169a-p3	ctacatcttggcccctgctcc	((((((((((((.((((..(((.(((.(((((.((((.(((((((((..((((((((((.(((.(((..(((((((.(((((...)))))...)))))))..))).))).))))))))))..))))))))).)))).))))).))).)))..)))).)))))).))...))))	56.6	-97.8	1
54	82	5'	osa-miR169b	CAGCCAAGGATGACTTGCCGG	21	Yes	5.66667	7	3.33333	6.83333	2.91667	8.58333	5.98684	6.05483	3.10157	6.16803	3.5998	9.62537	Chr6	-	27295908	27296035	gaacggaatgCAGCCAAGGATGACTTGCCGGtacgtgtatgcatgtttcaaggtactatatgtgcccccaactgttttagatccatgctgacattttccGGCAAGTTGTCCTTGGCTACGtcttgttc	Y	1	osa-MIR169b,	osa-MIR169b	gaacggaatgCAGCCAAGGATGACTTGCCGGtacgtgtatgcatgtttcaaggtactatatgtgcccccaactgttttagatccatgctgacattttccggcaagttgtccttggctacgtcttgttc	1	osa-miR169b	CAGCCAAGGATGACTTGCCGG	(((((..(((.(((((((((..(((((((((...((((..(((((..((..(((((.....))))).............))..)))))..))))...)))))))))..))))))))).)))..)))))	47.7	-62	1
54	83	3'	osa-MIR169b-p3	GGCAAGTTGTCCTTGGCTACG	21	New	3	16	0	3	3	10	3.1695	13.8396	0	2.70791	3.70265	11.214	Chr6	-	27295908	27296035	gaacggaatgCAGCCAAGGATGACTTGCCGGtacgtgtatgcatgtttcaaggtactatatgtgcccccaactgttttagatccatgctgacattttccGGCAAGTTGTCCTTGGCTACGtcttgttc	Y	1	osa-MIR169b,	osa-MIR169b	gaacggaatgCAGCCAAGGATGACTTGCCGGtacgtgtatgcatgtttcaaggtactatatgtgcccccaactgttttagatccatgctgacattttccggcaagttgtccttggctacgtcttgttc	1	osa-MIR169b-p3	ggcaagttgtccttggctacg	(((((..(((.(((((((((..(((((((((...((((..(((((..((..(((((.....))))).............))..)))))..))))...)))))))))..))))))))).)))..)))))	47.7	-62	1
55	84	5'	osa-miR169c_L-1R+1	AGCCAAGGATGACTTGCCGGC	21	Diff	27.1667	22.5	7.83333	22.8333	11.9167	27.0833	28.7016	19.4619	7.2887	20.6102	14.7077	30.3713	Chr4	-	30712338	30712449	gaacgggatgcAGCCAAGGATGACTTGCCGGCtcctggtattgggggaatctcagctttgctgaagcgccttggagttagccggcAAGTCTGTCCTTGGCTACACCTAgctc	Y	1	osa-MIR169c,	osa-MIR169c	gaacgggatgCAGCCAAGGATGACTTGCCGGctcctggtattgggggaatctcagctttgctgaagcgccttggagttagccggcaagtctgtccttggctacacctagctc	1	osa-miR169b	CAGCCAAGGATGACTTGCCGG	....(((.((.((((((((((((((((((((((((.(((..(((((...)))))(((((...))))))))..)))....))))))))))).)))))))))).))))).....	57.1	-55.4	0.9
56	85	5'	osa-miR169e_L-1R+1	AGCCAAGGATGACTTGCCGGC	21	Diff	13.6111	8.5	2.5	6.44444	2.08333	3.91667	14.3802	7.35229	2.32618	5.817	2.57128	4.39216	Chr2	-	31205866	31205997	gctggttgtgtAGCCAAGGATGACTTGCCGGCctggtttgtgttcatcagcaatccagcatatgctgtattgccgtGTGTGATCGATCGATGcatggaccggcaagttattttctttggctacattacaacc	Y	1	osa-MIR169e,	osa-MIR169e	gctggttgtgTAGCCAAGGATGACTTGCCGGcctggtttgtgttcatcagcaatccagcatatgctgtattgccgtgtgtgatcgatcgatgcatggaccggcaagttattttctttggctacattacaacc	1	osa-miR169e	TAGCCAAGGATGACTTGCCGG	...((((((((((((((((((((((((((((((((..(((...(((((((((((.((((....)))).)))))..)).)))).....)))..)).)).)))))))))))...)))))))))))...))))))	48.5	-59.5	0.9
57	86	5'	osa-miR169f.1_R-1	TAGCCAAGGATGACTTGCCT	20	Diff	3.06944	1.58333	3.625	2.11111	5.45833	5.55952	3.24287	1.36954	3.37296	1.90557	6.73676	6.23446	Chr2	-	18558299	18558512	gggccttccatgaggacaagagctgattcggTAGCCAAGGATGACTTGCCTaatgcctatgtgcatgtgtttatacgctgctcatctgcattttgattatcccctgatcagtcctgtcgtcaattatatgtgtgtgtagtactctgtactcatacatatataggcatgtcttccttggctaTTCGGAGCGGCTCTTgtctctcgtggaaggctg	Y	1	osa-MIR169f,	osa-MIR169f	gggccttccaTGAGGACAAGAGCTGATTCGGTAGCCAAGGATGACTTGCCTAatgcctatgtgcatgtgtttatacgctgctcatctgcattttgattatcccctgatcagtcctgtcgtcaattatatgtgtgtgtagtactctgtactcatacatatataggcatgtcttccttggctattcggagcggctcttgtctctcgtggaaggctg	1	osa-miR169f.1	TAGCCAAGGATGACTTGCCTA	.((((((((((((((((((((((((.(((((((((((((((.(((.((((.(((((..(((.(((.((((....))))))).)))..)))))(((((((.....))))))).............((((((((((((.(((((...))))))))))))))))))))).))).)))))))))).))))).))))))))))).))))))))))))).	46.7	-112.8	1.1
58	87	5'	osa-miR169g_R-1	TAGCCAAGGATGACTTGCCT	20	Diff	3.06944	1.58333	3.625	2.11111	5.45833	5.55952	3.24287	1.36954	3.37296	1.90557	6.73676	6.23446	Chr4	+	19420077	19420202	ctgcctctggTAGCCAAGGATGACTTGCCTattgtgctcttctgaatgatgcagtgccatgatcagtgtggcctggctggttcagatgagccgagataGGCAGTCTCCTTGGCTAGCctgagtggc	Y	1	osa-MIR169g,	osa-MIR169g	ctgcctctggTAGCCAAGGATGACTTGCCTAttgtgctcttctgaatgatgcagtgccatgatcagtgtggcctggctggttcagatgagccgagataggcagtctccttggctagcctgagtggc	1	osa-miR169f.1	TAGCCAAGGATGACTTGCCTA	..(((.((((((((((((((.((((.(((((((..((((.(((((((...((((.(((((.......))))))).))..))))))).))))...))))))))))))))))))))).))..)).)))	54.8	-66.4	1
59	88	5'	osa-miR169h_R-1	TAGCCAAGGATGACTTGCCT	20	Diff	3.06944	16.4167	1.625	16.2778	18.4583	17.0595	3.24287	14.2	1.51202	14.6929	22.7816	19.1306	Chr8	+	26807349	26807470	ttagctctggTAGCCAAGGATGACTTGCCTgtgtccttgtgtgtaaggatcattaattattattcagaaaatgatcctttcagcaggtttcatgGGCAGTCTCCTTGGCTAGCctgagtgat	Y	1	osa-MIR169h,	osa-MIR169h	ttagctctggTAGCCAAGGATGACTTGCCTGtgtccttgtgtgtaaggatcattaattattattcagaaaatgatcctttcagcaggtttcatgggcagtctccttggctagcctgagtgat	1	osa-miR169h	TAGCCAAGGATGACTTGCCTG	...((((.((((((((((((.(((.((((..((..(((((.((.((((((((((...............)))))))))).)))))))...))..))))))))))))))))).)).))))...	43.4	-58	1.1
59	89	3'	osa-MIR169h-p3	GGCAGTCTCCTTGGCTAGC	19	New	5.8	3.6	0	4.34286	0.2	2	6.12771	3.11391	0	3.92003	0.246843	2.24281	Chr8	+	26807349	26807470	ttagctctggTAGCCAAGGATGACTTGCCTgtgtccttgtgtgtaaggatcattaattattattcagaaaatgatcctttcagcaggtttcatgGGCAGTCTCCTTGGCTAGCctgagtgat	Y	1	osa-MIR169h,	osa-MIR169h	ttagctctggTAGCCAAGGATGACTTGCCTGtgtccttgtgtgtaaggatcattaattattattcagaaaatgatcctttcagcaggtttcatgggcagtctccttggctagcctgagtgat	1	osa-MIR169h-p3	ggcagtctccttggctagc	...((((.((((((((((((.(((.((((..((..(((((.((.((((((((((...............)))))))))).)))))))...))..))))))))))))))))).)).))))...	43.4	-58	1.1
60	90	5'	osa-miR169i_R-1	TAGCCAAGGATGACTTGCCT	20	Diff	3.06944	16.4167	1.625	16.2778	18.4583	17.0595	3.24287	14.2	1.51202	14.6929	22.7816	19.1306	Chr8	+	26803116	26803291	ggaagagagcaaggcttgcatggtgataagggtgtagctctggTAGCCAAGGATGACTTGCCTgtgtccttgtgtagaggatcattcagaaaatgagccttgaactggttcataggcagtctccttggctagtcTGAGTCGCTCTTATCACTCATGttaggcttgcatctcgttga	Y	1	osa-MIR169i,	osa-MIR169i	ggaagagagcaaggcttgcatggtgataagggtgtagctctggTAGCCAAGGATGACTTGCCTGtgtccttgtgtagaggatcattcagaaaatgagccttgaactggttcataggcagtctccttggctagtcTGAGTCGCTCTTATCACTCATGttaggcttgcatctcgttga	1	osa-miR169h	TAGCCAAGGATGACTTGCCTG	....(((((((((.((..((((((((((((((((..((((.((((((((((((.((((.(((((((..(..((...((((.(((((.....))))).))))..))..)..))))))))))))))))))))).)).)))))))))))))))).))))..)).))))).)))).....	48.3	-92.6	1.1
60	91	3'	osa-miR169i-3p	TGAGTCGCTCTTATCACTCATG	22	Yes	10	19.5	1	18.1429	1	11.5	10.565	16.867	0.930472	16.3764	1.23422	12.8961	Chr8	+	26803116	26803291	ggaagagagcaaggcttgcatggtgataagggtgtagctctggTAGCCAAGGATGACTTGCCTgtgtccttgtgtagaggatcattcagaaaatgagccttgaactggttcataggcagtctccttggctagtcTGAGTCGCTCTTATCACTCATGttaggcttgcatctcgttga	Y	1	osa-MIR169i,	osa-MIR169i	ggaagagagcaaggcttgcatggtgataagggtgtagctctggTAGCCAAGGATGACTTGCCTGtgtccttgtgtagaggatcattcagaaaatgagccttgaactggttcataggcagtctccttggctagtcTGAGTCGCTCTTATCACTCATGttaggcttgcatctcgttga	1	osa-miR169i-3p	TGAGTCGCTCTTATCACTCATG	....(((((((((.((..((((((((((((((((..((((.((((((((((((.((((.(((((((..(..((...((((.(((((.....))))).))))..))..)..))))))))))))))))))))).)).)))))))))))))))).))))..)).))))).)))).....	48.3	-92.6	1.1
61	92	5'	osa-miR169j_R-1	TAGCCAAGGATGACTTGCCT	20	Diff	3.06944	16.4167	1.625	16.2778	18.4583	17.0595	3.24287	14.2	1.51202	14.6929	22.7816	19.1306	Chr9	+	19788861	19788985	tcgcatctggTAGCCAAGGATGACTTGCCTgtgtctctgctcatgtgcagtagaagaagatgcatttctagctgctttctgcatatgtgatctcacaGGCAGTCTCCTTGGCTAGCctgagcggc	Y	1	osa-MIR169j,	osa-MIR169j	tcgcatctggTAGCCAAGGATGACTTGCCTGtgtctctgctcatgtgcagtagaagaagatgcatttctagctgctttctgcatatgtgatctcacaggcagtctccttggctagcctgagcggc	1	osa-miR169h	TAGCCAAGGATGACTTGCCTG	((((.((.((((((((((((.((((.(((((((........(((((((((.((.((.(((......)))..)).))..)))))))))......))))))))))))))))))))).)).)))))).	51.2	-60.4	0.9
62	93	5'	osa-miR169k_R-1	TAGCCAAGGATGACTTGCCT	20	Diff	3.06944	16.4167	1.625	16.2778	18.4583	17.0595	3.24287	14.2	1.51202	14.6929	22.7816	19.1306	Chr9	+	19792133	19792288	tctgtctagaTAGCCAAGGATGACTTGCCTgtggcctcttggagagagaggtgtagcttaattagcagcatggtttgagcattgcttgatcggttgatcgcttcgcttgctctgcatgagatcttacaGGCAGTCTCCTTGGCTAGTctgggcggc	Y	1	osa-MIR169k,	osa-MIR169k	tctgtctagaTAGCCAAGGATGACTTGCCTGtggcctcttggagagagaggtgtagcttaattagcagcatggtttgagcattgcttgatcggttgatcgcttcgcttgctctgcatgagatcttacaggcagtctccttggctagtctgggcggc	1	osa-miR169h	TAGCCAAGGATGACTTGCCTG	.(((((((((((((((((((.((((.(((((((..(((.((.((((..(((((.(((........((((.(((.(..(((...)))..))))))))...))).))))).)))).)).)))..)..))))))))))))))))))).)))))))))).	51.3	-73.7	0.9
63	94	5'	osa-miR169l_R-1	TAGCCAAGGATGACTTGCCT	20	Diff	3.06944	16.4167	1.625	16.2778	18.4583	17.0595	3.24287	14.2	1.51202	14.6929	22.7816	19.1306	Chr8	+	26817488	26817595	ttatctctgaTAGCCAAGGATGACTTGCCTgtgtcctccctgaaggattagcaatttaatgatcctttaagctggttcatgGGCAGTCTCCTTGGCTAGCctgagtgg	Y	2	osa-MIR169l,sbi-MIR169n,	osa-MIR169l	ttatctctgaTAGCCAAGGATGACTTGCCTGtgtcctccctgaaggattagcaatttaatgatcctttaagctggttcatgggcagtctccttggctagcctgagtgg	1	osa-miR169h	TAGCCAAGGATGACTTGCCTG	....(((...((((((((((.(((.((((..((.((....((((((((((.........))))))))))....))..))..)))))))))))))))))....)))...	47.2	-48.6	1
63	95	3'	osa-MIR169l-p3	GGCAGTCTCCTTGGCTAGC	19	New	5.8	3.6	0	4.34286	0.2	2	6.12771	3.11391	0	3.92003	0.246843	2.24281	Chr8	+	26817488	26817595	ttatctctgaTAGCCAAGGATGACTTGCCTgtgtcctccctgaaggattagcaatttaatgatcctttaagctggttcatgGGCAGTCTCCTTGGCTAGCctgagtgg	Y	2	osa-MIR169l,sbi-MIR169n,	osa-MIR169l	ttatctctgaTAGCCAAGGATGACTTGCCTGtgtcctccctgaaggattagcaatttaatgatcctttaagctggttcatgggcagtctccttggctagcctgagtgg	1	osa-MIR169l-p3	ggcagtctccttggctagc	....(((...((((((((((.(((.((((..((.((....((((((((((.........))))))))))....))..))..)))))))))))))))))....)))...	47.2	-48.6	1
64	96	5'	osa-miR169m_R-1	TAGCCAAGGATGACTTGCCT	20	Diff	3.06944	16.4167	1.625	16.2778	18.4583	17.0595	3.24287	14.2	1.51202	14.6929	22.7816	19.1306	Chr8	+	26813897	26814034	tgagtcctggTAGCCAAGGATGACTTGCCTgtatatttatatatatatgtgtgtgtgatcaatggatggattgatcaagctgcttgcaggctcatgcatatatatgtacaGGCAGTCTCCTTGGCTAGCccggctacc	Y	1	osa-MIR169m,	osa-MIR169m	tgagtcctggTAGCCAAGGATGACTTGCCTGtatatttatatatatatgtgtgtgtgatcaatggatggattgatcaagctgcttgcaggctcatgcatatatatgtacaggcagtctccttggctagcccggctacc	1	osa-miR169h	TAGCCAAGGATGACTTGCCTG	..((.((.((((((((((((.((((.((((((((......(((((((((..((.(((((((((......)))))))..((.....))..)).))..))))))))))))))))))))))))))))))).)).))))...	44.9	-64.1	1
65	97	5'	osa-miR169n	TAGCCAAGAATGACTTGCCTA	21	Yes	0.5	1	0	0.5	0	0.5	0.528251	0.864975	0	0.451319	0	0.560701	Chr11	-	6085252	6085428	ctccctttggTAGCCAAGAATGACTTGCCTAtgtgttttgccttgtgttggctcatccatccatctatcagccgttgcagatttgcagtggcagattaaagggtttcagaaagaaattcttgtgatggatgtgcaatgtggctgcATGGGCCGGTCTTCTTGGCTAGCcagagtggc	Y	1	osa-MIR169n,	osa-MIR169n	ctccctttggTAGCCAAGAATGACTTGCCTAtgtgttttgccttgtgttggctcatccatccatctatcagccgttgcagatttgcagtggcagattaaagggtttcagaaagaaattcttgtgatggatgtgcaatgtggctgcatgggccggtcttcttggctagccagagtggc	1	osa-miR169n	TAGCCAAGAATGACTTGCCTA	..((((((((((((((((((.(((..((((((((.....(((..(..(((.(.((((((((.....(((.(((..(((......)))..))).)))..(((..((((.....))))..)))..)))))))).))))..)))).))))))))..))))))))))))).)))))).)).	48.6	-81.2	0.9
66	98	5'	osa-miR169o	TAGCCAAGAATGACTTGCCTA	21	Yes	0.5	1	0	0.5	0	0.5	0.528251	0.864975	0	0.451319	0	0.560701	Chr11	-	6081528	6081700	ctccctttggTAGCCAAGAATGACTTGCCTAcgcttttgccctctgttggctcatccatccgtctatctatctgccatggcagatggcagattaagggtttctgaaagaaattcttgtgataggatgtgcaatgaggctgcATGGGCCGGTCTTCTTGGCTAGCcagagtggc	Y	1	osa-MIR169o,	osa-MIR169o	ctccctttggTAGCCAAGAATGACTTGCCTAcgcttttgccctctgttggctcatccatccgtctatctatctgccatggcagatggcagattaagggtttctgaaagaaattcttgtgataggatgtgcaatgaggctgcatgggccggtcttcttggctagccagagtggc	1	osa-miR169n	TAGCCAAGAATGACTTGCCTA	..((((((((((((((((((.(((..(((((.((......((((.....((.((((((((.((((..((((((((....)))))))).))))((((..((((.....))))..)))).))).))))).))...))))..)).)))))..))))))))))))).)))))).)).	50.3	-79.7	0.9
67	99	3'	osa-miR171b	TGATTGAGCCGTGCCAATATC	21	Yes	15.2	7.8	15.1	4.8	3.6	6.4	16.0588	6.74681	14.0501	4.33266	4.44318	7.17698	Chr8	+	5369153	5369252	gcgacgacgggatattggggcggttcAATCAGAAAGCTTGTGCTCcggaagcgaggagctctactctttTGATTGAGCCGTGCCAATATCacgtcgcatc	Y	1	osa-MIR171b,	osa-MIR171b	gcgacgacgggatattggggcggttcaatcagaaagcttgtgctccggaagcgaggagctctactctttTGATTGAGCCGTGCCAATATCacgtcgcatc	1	osa-miR171b	TGATTGAGCCGTGCCAATATC	((((((....((((((((..((((((((((((((.......(((((........))))).......))))))))))))))..)))))))).))))))...	54	-51.9	1
68	100	5'	osa-miR171c-5p	GGATATTGGTGCGGTTCAATC	21	Yes	1	1	0.5	0	1	0	1.0565	0.864975	0.465236	0	1.23422	0	Chr4	-	31713472	31713570	gtgggaacgGGATATTGGTGCGGTTCAATCagaaagcttgtgctccgaaggcgaggggctccactcttTGATTGAGCCGTGCCAATATCacgtcgcctt	Y	4	osa-MIR171c,sbi-MIR171k,zma-MIR171b,bdi-MIR171c,	osa-MIR171c	gtgggaacgGGATATTGGTGCGGTTCAATCagaaagcttgtgctccgaaggcgaggggctccactcttTGATTGAGCCGTGCCAATATCacgtcgcctt	1	osa-miR171c-5p	GGATATTGGTGCGGTTCAATC	..((..(((.((((((((..(((((((((((((.((.....(((((........)))))....)).)))))))))))))..)))))))).)))..))..	54.5	-51.3	1
68	101	3'	osa-miR171c-3p	TGATTGAGCCGTGCCAATATC	21	Yes	15.2	7.8	15.1	4.8	3.6	6.4	16.0588	6.74681	14.0501	4.33266	4.44318	7.17698	Chr4	-	31713472	31713570	gtgggaacgGGATATTGGTGCGGTTCAATCagaaagcttgtgctccgaaggcgaggggctccactcttTGATTGAGCCGTGCCAATATCacgtcgcctt	Y	4	osa-MIR171c,sbi-MIR171k,zma-MIR171b,bdi-MIR171c,	osa-MIR171c	gtgggaacgGGATATTGGTGCGGTTCAATCagaaagcttgtgctccgaaggcgaggggctccactcttTGATTGAGCCGTGCCAATATCacgtcgcctt	1	osa-miR171b	TGATTGAGCCGTGCCAATATC	..((..(((.((((((((..(((((((((((((.((.....(((((........)))))....)).)))))))))))))..)))))))).)))..))..	54.5	-51.3	1
69	102	3'	osa-miR171d-3p	TGATTGAGCCGTGCCAATATC	21	Yes	15.2	7.8	15.1	4.8	3.6	6.4	16.0588	6.74681	14.0501	4.33266	4.44318	7.17698	Chr10	+	21237313	21237447	ttgtagctatgatgttggcccggctcactcagatggatcatcggtgcagaagagtgCATGAATCTGATGCAgtctcagtgtagtatgctccatgctggaacttcTGATTGAGCCGTGCCAATATCtcagcaccat	Y	1	osa-MIR171d,	osa-MIR171d	ttgtagctatgaTGTTGGCCCGGCTCACTCAGAtggatcatcggtgcagaagagtgcatgaatctgatgcagtctcagtgtagtatgctccatgctggaacttcTGATTGAGCCGTGCCAATATCtcagcaccat	1	osa-miR171b	TGATTGAGCCGTGCCAATATC	.((..(((..(((((((((.(((((((.(((((((((.(((..(..(.((.((.(((((.......))))).)))).)..)...))).))))..........))))).))))))).)))))))))..)))..)).	48.9	-54.9	0.8
70	103	3'	osa-miR171e-3p	TGATTGAGCCGTGCCAATATC	21	Yes	15.2	7.8	15.1	4.8	3.6	6.4	16.0588	6.74681	14.0501	4.33266	4.44318	7.17698	Chr3	+	1970487	1970605	tggtagctatgatgTTGGCTCGGCTCACTCAGACGgcattggcgtgatgcaaagcatgcatgcgtgcttgctagctcacttgtgtttcTGATTGAGCCGTGCCAATATCttagtgctct	Y	1	osa-MIR171e,	osa-MIR171e	tggtagctatgaTGTTGGCTCGGCTCACTCAGAcggcattggcgtgatgcaaagcatgcatgcgtgcttgctagctcacttgtgtttcTGATTGAGCCGTGCCAATATCttagtgctct	1	osa-miR171b	TGATTGAGCCGTGCCAATATC	.((((.(((.(((((((((.(((((((.(((((..(((.(((.((...((((.(((((....)))))))))..)))))..)))...))))).))))))).))))))))).)))))))..	50.4	-56.3	0.9
71	104	5'	osa-MIR171f-3p_L-3R+3	CGATGTTGGCATGGTTCAATC	21	New	5	2	0	1	5	3	5.28251	1.72995	0	0.902638	6.17108	3.36421	Chr3	+	30027774	30027900	gggagagtgCGATGTTGGCATGGTTCAATCaaaccgggcaaacttatgcactagctaagcaagatgcagggatatgcagtatggttttgtttggtcTGATTGAGCCGTGCCAATATCacaagcttgc	Y	1	osa-MIR171f,	osa-MIR171f	gggagagtgcgaTGTTGGCATGGTTCAATCAAAccgggcaaacttatgcactagctaagcaagatgcagggatatgcagtatggttttgtttggtcTGATTGAGCCGTGCCAATATCacaagcttgc	1	osa-MIR171f-p5	cgaTGTTGGCATGGTTCAATC	..(((..((.(((((((((((((((((((((.(((..(((((((..((((....((..((.....))..))...))))....)).)))))..))).))))))))))))))))))))).))..)))..	47.2	-60.7	1
71	105	3'	osa-miR171f-3p	TGATTGAGCCGTGCCAATATC	21	Yes	15.2	7.8	15.1	4.8	3.6	6.4	16.0588	6.74681	14.0501	4.33266	4.44318	7.17698	Chr3	+	30027774	30027900	gggagagtgCGATGTTGGCATGGTTCAATCaaaccgggcaaacttatgcactagctaagcaagatgcagggatatgcagtatggttttgtttggtcTGATTGAGCCGTGCCAATATCacaagcttgc	Y	1	osa-MIR171f,	osa-MIR171f	gggagagtgcgaTGTTGGCATGGTTCAATCAAAccgggcaaacttatgcactagctaagcaagatgcagggatatgcagtatggttttgtttggtcTGATTGAGCCGTGCCAATATCacaagcttgc	1	osa-miR171b	TGATTGAGCCGTGCCAATATC	..(((..((.(((((((((((((((((((((.(((..(((((((..((((....((..((.....))..))...))))....)).)))))..))).))))))))))))))))))))).))..)))..	47.2	-60.7	1
72	106	5'	osa-MIR171g-p5	CATGGTATTGACTTGGCTCATC	22	New	10	41	11	32	16	8	10.565	35.464	10.2352	28.8844	19.7474	8.97122	Chr7	-	15636744	15636832	gacatggCATGGTATTGACTTGGCTCATCtcagcaacagcaaactgcatgcagcgctggaggTGAGCCGAGCCAATATCACTTcatgtc	Y	1	osa-MIR171g,	osa-MIR171g	gacatggcatggtattgacttggctcatctcagcaacagcaaactgcatgcagcgctgGAGGTGAGCCGAGCCAATATCacttcatgtc	1	osa-MIR171g-p5	catggtattgacttggctcatc	(((((((..((((((((.(((((((((((((.....((((...(((....))).))))))))))))))))).))))))))..)))))))	51.7	-46.6	1
72	107	3'	osa-MIR171g-3p_L-4R+4	TGAGCCGAGCCAATATCACTT	21	New	28	59	15	43.5	50	37	29.582	51.0335	13.9571	39.2648	61.7108	41.4919	Chr7	-	15636744	15636832	gacatggCATGGTATTGACTTGGCTCATCtcagcaacagcaaactgcatgcagcgctggaggTGAGCCGAGCCAATATCACTTcatgtc	Y	1	osa-MIR171g,	osa-MIR171g	gacatggcatggtattgacttggctcatctcagcaacagcaaactgcatgcagcgctgGAGGTGAGCCGAGCCAATATCacttcatgtc	1	osa-MIR171g-p3	TGAGCCGAGCCAATATCactt	(((((((..((((((((.(((((((((((((.....((((...(((....))).))))))))))))))))).))))))))..)))))))	51.7	-46.6	1
73	108	3'	osa-miR171h_L-1R+1	TGAGCCGAACCAATATCACTC	21	Diff	9	1	0	1.5	2	2	9.50851	0.864975	0	1.35396	2.46843	2.24281	Chr4	+	28482456	28482556	agaagaagaggacatggTTTGGTATTGTTTCGGCTCATGtcgttcacacagatgTGAGCCGAACCAATATCACTCatgtattcttcattcagagaacttct	Y	1	osa-MIR171h,	osa-MIR171h	agaagaagaggacatggtttggtattgtttcggctcatgtcgttcacacagatGTGAGCCGAACCAATATCACTcatgtattcttcattcagagaacttct	1	osa-miR171h	GTGAGCCGAACCAATATCACT	.((((((((..((((((..((((((((.(((((((((..((.........))..))))))))).)))))))).))))))..))))).)))...........	41.6	-42.9	1
74	109	3'	osa-MIR171i-p3	TTGAGCCGCGTCAATATCTCT	21	New	198	92	228	56	66	51	209.187	79.5777	212.148	50.5477	81.4582	57.1915	Chr3	+	21191603	21191722	taaaaagaggtaTTGGCGTGCCTCAATCCGAAGgcatggctgattacaggcacctcgaccgatctagcgcatgcagccatgtttcttggaTTGAGCCGCGTCAATATCTCTccttgcttc	Y	1	osa-MIR171i,	osa-MIR171i	taaaaagAGGTATTGGCGTGCCTCAATCcgaaggcatggctgattacaggcacctcgaccgatctagcgcatgcagccatgtttcttGGATTGAGCCGCGTCAATATCtctccttgcttc	1	osa-MIR171i-p3	TTGAGCCGCGTCAATATCtct	.....(((((((((((((((.(((((((((((..((((((((.......((..((.((....)).)).))...))))))))..).)))))))))).))))))))))))))).........	50.8	-54.6	0.9
75	110	3'	osa-miR172a	AGAATCTTGATGATGCTGCAT	21	Yes	74	100.167	138.5	62	34.3333	116.667	78.1811	86.6417	128.87	55.9636	42.3747	130.83	Chr9	+	22881834	22881942	gtgtttgcgggcGTGGCATCATCAAGATTCACAtccatgcatatatcacaagacgcacatatacatccgatttggctgAGAATCTTGATGATGCTGCATccgcagacaa	Y	1	osa-MIR172a,	osa-MIR172a	gtgtttgcgggcgtggcatcatcaagattcacatccatgcatatatcacaagacgcacatatacatccgatttggctgAGAATCTTGATGATGCTGCATccgcagacaa	1	osa-miR172a	AGAATCTTGATGATGCTGCAT	.(((((((((..(..(((((((((((((((.((.((((((..............)))...............))).)).)))))))))))))))..)..))))))))).	45.9	-48.9	1
76	111	3'	osa-miR172c	TGAATCTTGATGATGCTGCAC	21	Yes	0	3	1	0	0	0	0	2.59493	0.930472	0	0	0	Chr7	-	13111485	13111595	cttgttgcgggTGCAGCGTCATCAAGATTCACgtgtgccgcacggcacacgtatcggttttcaagtgtagtcatcgtgcgTGAATCTTGATGATGCTGCACcagcaaagag	Y	1	osa-MIR172c,	osa-MIR172c	cttgttgcgggtgcagcgtcatcaagattcacgtgtgccgcacggcacacgtatcggttttcaagtgtagtcatcgtgcgTGAATCTTGATGATGCTGCACcagcaaagag	1	osa-miR172c	TGAATCTTGATGATGCTGCAC	((..((((.((((((((((((((((((((((((((((((....)))))................(((....)))...))))))))))))))))))))))))).))))..))	52.3	-61.9	1.1
77	112	5'	osa-miR172d-5p_R+1	GCAGCACCATCAAGATTCACA	21	Diff	18	33	35	38	24	37	19.017	28.5442	32.5665	34.3002	29.6212	41.4919	Chr2	-	35143537	35143666	aaacagtcggtgcttgcaggtGCAGCACCATCAAGATTCACAtcgagttcatccctaaacgagatcgaggttggctgactatatgtgatgAGAATCTTGATGATGCTGCATcagcaaacgctcgactact	Y	1	osa-MIR172d,	osa-MIR172d	aaacagtcggtgcttgcaggtGCAGCACCATCAAGATTCACatcgagttcatccctaaacgagatcgaggttggctgactatatgtgatgAGAATCTTGATGATGCTGCATcagcaaacgctcgactact	1	osa-miR172d-5p	GCAGCACCATCAAGATTCAC	....((((((((.((((.(((((((((.(((((((((((.((((((((.((.((.....((....)).....)).))))).....))))).))))))))))).))))))))).)))).))).)))))...	46.9	-56.7	0.9
77	113	3'	osa-miR172d	AGAATCTTGATGATGCTGCAT	21	Yes	74	100.167	138.5	62	34.3333	116.667	78.1811	86.6417	128.87	55.9636	42.3747	130.83	Chr2	-	35143537	35143666	aaacagtcggtgcttgcaggtGCAGCACCATCAAGATTCACAtcgagttcatccctaaacgagatcgaggttggctgactatatgtgatgAGAATCTTGATGATGCTGCATcagcaaacgctcgactact	Y	1	osa-MIR172d,	osa-MIR172d	aaacagtcggtgcttgcaggtGCAGCACCATCAAGATTCACatcgagttcatccctaaacgagatcgaggttggctgactatatgtgatgAGAATCTTGATGATGCTGCATcagcaaacgctcgactact	1	osa-miR172a	AGAATCTTGATGATGCTGCAT	....((((((((.((((.(((((((((.(((((((((((.((((((((.((.((.....((....)).....)).))))).....))))).))))))))))).))))))))).)))).))).)))))...	46.9	-56.7	0.9
78	114	3'	osa-miR319a-3p.2-3p_R+1	TTGGACTGAAGGGTGCTCCCT	21	Diff	5.5	16.5	6	59.5	12.5	26	5.81076	14.2721	5.58283	53.707	15.4277	29.1565	Chr1	-	26823282	26823472	tgtgtaAGAAGAGAGCTCTCTtcagtccactctcagatggctgtagggttttattagctgccgaatcatccattcacctaccaagaaagttgcaggagtgtatctcttggtagcggactggatgacgcgggagctaaaatttagctctgcgccgtttgtggTTGGACTGAAGGGTGCTCCCTtgctcaagc	Y	2	osa-MIR319a,bdi-MIR319b,	osa-MIR319a	tgtgtaagaagagagctctcttcagtccactctcagatggctgtagggttttattagctgccgaatcatccattcacctaccaagaaagttgcaggagtgtatctcttggtagcggACTGGATGACGCGGGAGCTAAaatttagctctgcgccgtttgtggTTGGACTGAAGGGTGCTCCCttgctcaagc	1	osa-miR319a-3p.2-3p	TTGGACTGAAGGGTGCTCCC	((.(((((....((((.((((((((((((..(.((((((((.((((((((...((((((.(((..(((((((.((..(((((((((....((((....))))..)))))))))..)).)))))))..))).)))))).....)))))))))))))))).)..)))))))))))).)))).))))).))...	49.7	-101.5	1.1
79	115	3'	osa-miR319b	TTGGACTGAAGGGTGCTCCCT	21	Diff	5.5	16.5	6	59.5	12.5	26	5.81076	14.2721	5.58283	53.707	15.4277	29.1565	Chr1	-	6677570	6677766	gatggatggaagagagcgtccttcagtccactcatgggcggtgctagggtcgaattAGCTGCCGACTCATTCACCCAcatgccaagcaagaaacgcttgagatagcgaagcttagcagatgagtgaatgaagcgggaggtaacgttccgatctcgcgccgtctttgcTTGGACTGAAGGGTGCTCCCTcctcctcga	Y	1	osa-MIR319b,	osa-MIR319b	gatggatggaagagagcgtccttcagtccactcatgggcggtgctagggtcgaattagctgccgactcattcacccacatgccaagcaagaaacgcttgagatagcgaagcttagcagatgagtgaatgaagcgggaggtaacgttccgatctcgcgccgtctttgcTTGGACTGAAGGGTGCTCCCtcctcctcga	1	osa-miR319a-3p.2-3p	TTGGACTGAAGGGTGCTCCC	((.(((.((.((.((((..(((((((((((..((..((((((((..(((((((((((.((.(((..((((((((.((..(((.((((......((((......))))..)))).)))..)).))))))))..))).)).))..))).)))))).))))))))..))..)))))))))))..)))).)))))))))..	54.8	-98.4	0.9
80	116	5'	osa-miR390-5p	AAGCTCAGGAGGGATAGCGCC	21	Yes	73	29	51	10	12	3	77.1246	25.0843	47.4541	9.02638	14.8106	3.36421	Chr3	-	34275140	34275230	ggtatggaacaatccttgAAGCTCAGGAGGGATAGCGCCtcgaaatcaaactaggCGCTATCTATCCTGAGCTCCatggtttgttcttacc	Y	1	osa-MIR390,	osa-MIR390	ggtatggaacaatccttgAAGCTCAGGAGGGATAGCGCCtcgaaatcaaactaggCGCTATCTATCCTGAGCTCCatggtttgttcttacc	1	osa-miR390-5p	AAGCTCAGGAGGGATAGCGCC	((((.(((((((.((.((.(((((((((..((((((((((............))))))))))..))))))))).)).)).)))))))))))	48.4	-51.2	1.2
80	117	3'	osa-miR390-3p	CGCTATCTATCCTGAGCTCC	20	Yes	4	4	3	0	1	1	4.22601	3.4599	2.79142	0	1.23422	1.1214	Chr3	-	34275140	34275230	ggtatggaacaatccttgAAGCTCAGGAGGGATAGCGCCtcgaaatcaaactaggCGCTATCTATCCTGAGCTCCatggtttgttcttacc	Y	1	osa-MIR390,	osa-MIR390	ggtatggaacaatccttgAAGCTCAGGAGGGATAGCGCCtcgaaatcaaactaggCGCTATCTATCCTGAGCTCCatggtttgttcttacc	1	osa-miR390-3p	CGCTATCTATCCTGAGCTCC	((((.(((((((.((.((.(((((((((..((((((((((............))))))))))..))))))))).)).)).)))))))))))	48.4	-51.2	1.2
81	118	5'	osa-miR393a	TCCAAAGGGATCGCATTGATC	21	Yes	28.5	27	38	23.5	9	19	30.1103	23.3543	35.3579	21.212	11.1079	21.3066	Chr1	-	2309149	2309263	tggggaagcaTCCAAAGGGATCGCATTGATCcttcatcgctctcgctcgcttccatggcggtcgtcgtctacaagcagcttgacggatcatgcgatccttttggaggcttcctct	Y	1	osa-MIR393a,	osa-MIR393a	tggggaagcaTCCAAAGGGATCGCATTGATCcttcatcgctctcgctcgcttccatggcggtcgtcgtctacaagcagcttgacggatcatgcgatccttttggaggcttcctct	1	osa-miR393a	TCCAAAGGGATCGCATTGATC	.((((((((.((((((((((((((((.(((((.(((..(((((((..((((.....))))..)).........)).))).))).))))))))))))))))))))).)))))))).	54.8	-61.6	1
82	119	5'	osa-miR393b	TCCAAAGGGATCGCATTGATC	21	Yes	28.5	27	38	23.5	9	19	30.1103	23.3543	35.3579	21.212	11.1079	21.3066	Chr4	-	34931876	34932007	tcggcctgaggaaactagtggaggacTCCAAAGGGATCGCATTGATCtggctagctatctcgatcgatcgcctcatcgatcgacgacgacgtgcgtgatcgaTCAGTGCAATCCCTTtggaattttcctctt	Y	1	osa-MIR393b,	osa-MIR393b	tcggcctgaggaaactagtggaggacTCCAAAGGGATCGCATTGATCtggctagctatctcgatcgatcgcctcatcgatcgacgacgacgtgcgtgatcgaTCAGTGCAATCCCTTTGGAATtttcctctt	1	osa-miR393a	TCCAAAGGGATCGCATTGATC	........((....))...((((((.(((((((((((.(((((((((.(..((((..(((((.(((((((......)))))))))).))...)).))..)))))))))).)))))))))))....)))))).	51.5	-58.2	0.9
83	120	5'	osa-miR394	TTGGCATTCTGTCCACCTCC	20	Yes	507	386	573	290	240	480	535.646	333.88	533.161	261.765	296.212	538.273	Chr2	+	27148154	27148263	tactgagagttctTTGGCATTCTGTCCACCTCCttgtcgaatcctcagagacagaaatctcatatctgttgatcttggAGGTGGGCATACTGCCAATGGagctgtgtagg	Y	1	osa-MIR394,	osa-MIR394	tactgagagttctTTGGCATTCTGTCCACCTCCttgtcgaatcctcagagacagaaatctcatatctgttgatcttggaggtgggcatactgccaatggagctgtgtagg	1	osa-miR394	TTGGCATTCTGTCCACCTCC	..(((..((((((((((((...(((((((((((..(((((.......((((......)))).......)))))...)))))))))))...)))))).))))))...))).	47.3	-45.1	0.9
83	121	3'	osa-MIR394-p3	AGGTGGGCATACTGCCAATGG	21	New	1	4	0	4	2	5	1.0565	3.4599	0	3.61055	2.46843	5.60701	Chr2	+	27148154	27148263	tactgagagttctTTGGCATTCTGTCCACCTCCttgtcgaatcctcagagacagaaatctcatatctgttgatcttggAGGTGGGCATACTGCCAATGGagctgtgtagg	Y	1	osa-MIR394,	osa-MIR394	tactgagagttctTTGGCATTCTGTCCACCTCCttgtcgaatcctcagagacagaaatctcatatctgttgatcttggaggtgggcatactgccaatggagctgtgtagg	1	osa-MIR394-p3	aggtgggcatactgccaatgg	..(((..((((((((((((...(((((((((((..(((((.......((((......)))).......)))))...)))))))))))...)))))).))))))...))).	47.3	-45.1	0.9
84	122	3'	osa-miR395a_L-1	TGAAGTGCTTGGGGGAACTC	20	Diff	7	6	0	14	0	0	7.39551	5.18985	0	12.6369	0	0	Chr4	-	31805494	31805635	ttgtccactggaGTTCTCCTCAATCCACTTCAGTagatagctatggctaggcctcattgcattgcactgttacataactgtgatcatggggccaaaagctagctatgtatagTGAAGTGCTTGGGGGAACTCcagttgacac	Y	1	osa-MIR395a,	osa-MIR395a	ttgtccactggagttctcctcaatccacttcagtagatagctatggctaggcctcattgcattgcactgttacataactgtgatcatggggccaaaagctagctatgtataGTGAAGTGCTTGGGGGAACTCcagttgacac	1	osa-miR395a	GTGAAGTGCTTGGGGGAACTC	.((((.(((((((((((((.(((..((((((((((.((((((..((((.((((((((.(.((..((..(((....)))))..)))))))))))...)))))))))).)))..))))))).)))))))))))))))).)))).	46.5	-69.2	1
85	123	3'	osa-miR395b_L-1	TGAAGTGTTTGGGGGAACTC	20	Diff	7.54779	8.43015	2.375	13.375	0.5	0.5625	7.97425	7.29187	2.20987	12.0728	0.617108	0.630789	Chr4	-	31805334	31805419	gagtccctaggagttcctttcaagcactttacgacacactgtattgagagttgtcgTGAAGTGTTTGGGGGAACTCttagtgtcgc	Y	1	osa-MIR395b,	osa-MIR395b	gagtccctaggagttcctttcaagcactttacgacacactgtattgagagttgtcGTGAAGTGTTTGGGGGAACTCttagtgtcgc	1	osa-miR395b	GTGAAGTGTTTGGGGGAACTC	......(((((((((.((..((((((((((((((((.(((........)))))))))))))))))))..)))))))))))......	47.7	-42.4	1
86	124	3'	osa-miR395d_L-1	TGAAGTGTTTGGGGGAACTC	20	Diff	7.54779	8.43015	2.375	13.375	0.5	0.5625	7.97425	7.29187	2.20987	12.0728	0.617108	0.630789	Chr4	-	31805055	31805142	gtattgtcgtgaGTTCCCTTCAAGCACTTCACGtggcactatctcaatgcctactatgTGAAGTGTTTGGGGGAACTCtcgatatcac	Y	1	osa-MIR395d,	osa-MIR395d	gtattgtcgtgagttcccttcaagcacttcacgtggcactatctcaatgcctactatGTGAAGTGTTTGGGGGAACTCtcgatatcac	1	osa-miR395b	GTGAAGTGTTTGGGGGAACTC	((..(((((.((((((((.(((((((((((((((((((.........))))....))))))))))))))))))))))).)))))..))	46.6	-45.7	1.1
87	125	3'	osa-miR395e_L-1	TGAAGTGTTTGGGGGAACTC	20	Diff	7.54779	8.43015	2.375	13.375	0.5	0.5625	7.97425	7.29187	2.20987	12.0728	0.617108	0.630789	Chr4	-	31804912	31804999	gtattatcgagagttcccttcaaccacttcacgTGGCACTGTTTCAAGgcctattgtgTGAAGTGTTTGGGGGAACTCtcgatatcac	Y	1	osa-MIR395e,	osa-MIR395e	gtattatcgagagttcccttcaaccacttcacgtggcactgtttcaaggcctattgtGTGAAGTGTTTGGGGGAACTCtcgatatcac	1	osa-miR395b	GTGAAGTGTTTGGGGGAACTC	((..(((((((((((((((.(((.(((((((((.(((.((......))))).....))))))))).))))))))))))))))))..))	46.6	-45.5	1.1
88	126	5'	osa-MIR395g-p5	GTTCCCTTCGAACACTTCACG	21	New	1	5	0	4	0	0	1.0565	4.32488	0	3.61055	0	0	Chr4	-	31804633	31804718	gtatcaccgtgaGTTCCCTTCGAACACTTCACGtggcactatttcaatgcctattgTGAAGTGTTTGGGGGAACTCtcgatgtcat	Y	1	osa-MIR395g,	osa-MIR395g	gtatcaccgtgagttcccttcgaacacttcacgtggcactatttcaatgcctattGTGAAGTGTTTGGGGGAACTCtcgatgtcat	1	osa-MIR395g-p5	gttcccttcgaacacttcacg	....((.((.((((((((.((((((((((((((.((((.........))))...)))))))))))))))))))))).)).))....	46.5	-41.1	1
88	127	3'	osa-miR395g_L-1	TGAAGTGTTTGGGGGAACTC	20	Diff	7.54779	8.43015	2.375	13.375	0.5	0.5625	7.97425	7.29187	2.20987	12.0728	0.617108	0.630789	Chr4	-	31804633	31804718	gtatcaccgtgaGTTCCCTTCGAACACTTCACGtggcactatttcaatgcctattgTGAAGTGTTTGGGGGAACTCtcgatgtcat	Y	1	osa-MIR395g,	osa-MIR395g	gtatcaccgtgagttcccttcgaacacttcacgtggcactatttcaatgcctattGTGAAGTGTTTGGGGGAACTCtcgatgtcat	1	osa-miR395b	GTGAAGTGTTTGGGGGAACTC	....((.((.((((((((.((((((((((((((.((((.........))))...)))))))))))))))))))))).)).))....	46.5	-41.1	1
89	128	3'	osa-miR395h_L-1	TGAAGTGTTTGGGGGAACTC	20	Diff	7.54779	8.43015	2.375	13.375	0.5	0.5625	7.97425	7.29187	2.20987	12.0728	0.617108	0.630789	Chr8	+	3299144	3299255	ttgttacctggagtttcctcaacacacttcacatctgctaggccctattacaattgcgcaatgtggagtctgcaattggtagTGAAGTGTTTGGGGGAACTCtaggtggcac	Y	1	osa-MIR395h,	osa-MIR395h	ttgttacctggagtttcctcaacacacttcacatctgctaggccctattacaattgcgcaatgtggagtctgcaattggtaGTGAAGTGTTTGGGGGAACTCtaggtggcac	1	osa-miR395b	GTGAAGTGTTTGGGGGAACTC	.((..(((((((((((((((((.(((((((((((((((.((((.((((..............)))).)))))))...))).))))))))))))))))))))))))))..)).	47.3	-54.7	1
90	129	3'	osa-miR395i_L-1	TGAAGTGTTTGGGGGAACTC	20	Diff	7.54779	8.43015	2.375	13.375	0.5	0.5625	7.97425	7.29187	2.20987	12.0728	0.617108	0.630789	Chr8	+	3299319	3299417	gttttaccgggagttctctTCAAGCACTTCACGTAGAGCTttctattgacatggagctttagaacaatgTGAAGTGTTTGGGGGAACTCttggtaccaa	Y	1	osa-MIR395i,	osa-MIR395i	gttttaccgggagttctcttcaagcacttcacgtagagctttctattgacatggagctttagaacaatGTGAAGTGTTTGGGGGAACTCttggtaccaa	1	osa-miR395b	GTGAAGTGTTTGGGGGAACTC	....((((..((((((.(..(((((((((((((((((((..(((((....))))))))))......))))))))))))))..)))))))..))))....	43.4	-45.9	1.1
91	130	3'	osa-miR395j_L-1	TGAAGTGTTTGGGGGAACTC	20	Diff	7.54779	8.43015	2.375	13.375	0.5	0.5625	7.97425	7.29187	2.20987	12.0728	0.617108	0.630789	Chr8	+	3299479	3299590	gtgttcccaagaGTTCCTTGCAAGCACTTCACAtagaacttctgttactctcatgtaacattgggaacttgagaagctactgTGAAGTGTTTGGGGGAACTCtaggtggcac	Y	1	osa-MIR395j,	osa-MIR395j	gtgttcccaagagttccttgcaagcacttcacatagaacttctgttactctcatgtaacattgggaacttgagaagctactGTGAAGTGTTTGGGGGAACTCtaggtggcac	1	osa-miR395b	GTGAAGTGTTTGGGGGAACTC	((((..((.((((((((...((((((((((((((((..(((((.....(((((........))))).....)))))))).)))))))))))))..)))))))).))..))))	45.5	-50.3	1
92	131	3'	osa-miR395k_L-1	TGAAGTGTTTGGGGGAACTC	20	Diff	7.54779	8.43015	2.375	13.375	0.5	0.5625	7.97425	7.29187	2.20987	12.0728	0.617108	0.630789	Chr8	+	3299652	3299750	gttttatcgggAGTTTCCTTCAAGCACTTCACGtagagctttctattgatatggagctttggaacaatgTGAAGTGTTTGGGGGAACTCttgataccaa	Y	1	osa-MIR395k,	osa-MIR395k	gttttatcgggagtttccttcaagcacttcacgtagagctttctattgatatggagctttggaacaatGTGAAGTGTTTGGGGGAACTCttgataccaa	1	osa-miR395b	GTGAAGTGTTTGGGGGAACTC	....((((..(((.((((..(((((((((((((((((((((..((....))..)))))))......))))))))))))))..)))))))..))))....	41.4	-44.8	1.1
93	132	3'	osa-miR395I_L-1	TGAAGTGTTTGGGGGAACTC	20	Diff	7.54779	8.43015	2.375	13.375	0.5	0.5625	7.97425	7.29187	2.20987	12.0728	0.617108	0.630789	Chr8	+	3299997	3300090	gCGTTCCTTCCAAGCACTTCACAcagagcttttatttctctcacatcgattgagaacttaattagaagcttttgTGAAGTGTTTGGGGGAACTC	Y	1	osa-MIR395l,	osa-MIR395l	gcgttccttccaagcacttcacacagagcttttatttctctcacatcgattgagaacttaattagaagcttttGTGAAGTGTTTGGGGGAACTC	1	osa-miR395b	GTGAAGTGTTTGGGGGAACTC	..(((((.(((((((((((((((.((((((((((....(((((.......))))).......))))))))))))))))))))))))))))))..	41.5	-44.7	1.1
94	133	3'	osa-miR395m_L-1	TGAAGTGTTTGGGGGAACTC	20	Diff	7.54779	8.43015	2.375	13.375	0.5	0.5625	7.97425	7.29187	2.20987	12.0728	0.617108	0.630789	Chr4	+	32621993	32622112	gagttctcctcaaatcacttcagtAGATAGCTAGCTAGGcttcattgcattacactgttacaaaactgtgagcatggggccaaaagctagttgtatatagTGAAGTGTTTGGGGGAACTC	Y	1	osa-MIR395m,	osa-MIR395m	gagttctcctcaaatcacttcagtagatagctagctaggcttcattgcattacactgttacaaaactgtgagcatggggccaaaagctagttgtatataGTGAAGTGTTTGGGGGAACTC	1	osa-miR395b	GTGAAGTGTTTGGGGGAACTC	((((((.(((((((.(((((((.((.((((((((((.(((..(((.((.(((((..(((....)))))))))))))..)))...))))))))))...)).))))))))))))))))))))	42.5	-56.5	1.1
95	134	3'	osa-miR395n_L-1	TGAAGTGTTTGGGGGAACTC	20	Diff	7.54779	8.43015	2.375	13.375	0.5	0.5625	7.97425	7.29187	2.20987	12.0728	0.617108	0.630789	Chr4	+	32622228	32622323	gtttggagaccccaggaGTTCCCTTCAAGCACTTCACGacgcactatttagagagttgttgTGAAGTGTTTGGGGGAACTCtcggtgtcgccaagc	Y	2	osa-MIR395n,bdi-MIR395f,	osa-MIR395n	gagttcccttcaagcacttcacgacgcactatttagagagttgttGTGAAGTGTTTGGGGGAACTC	0	osa-miR395b	GTGAAGTGTTTGGGGGAACTC	((((((.(((.((..((((((((.(((((((((((((((((.(((........))))))))))))))))))))))))))))..)).))).))))))	52.1	-57.6	1.2
96	135	3'	osa-miR395p_L-1	TGAAGTGTTTGGGGGAACTC	20	Diff	7.54779	8.43015	2.375	13.375	0.5	0.5625	7.97425	7.29187	2.20987	12.0728	0.617108	0.630789	Chr4	+	32622525	32622592	gaGTTCCCTTCAAGCACTTCACGtggcactatttcaatgcgtaccgtgTGAAGTGTTTGGGGGAACTC	Y	1	osa-MIR395p,	osa-MIR395p	gagttcccttcaagcacttcacgtggcactatttcaatgcgtaccgtGTGAAGTGTTTGGGGGAACTC	1	osa-miR395b	GTGAAGTGTTTGGGGGAACTC	((((((((.(((((((((((((..((.(((((....))).)).))..)))))))))))))))))))))	50	-37.1	1.1
97	136	3'	osa-miR395q_L-1	TGAAGTGTTTGGGGGAACTC	20	Diff	7.54779	8.43015	2.375	13.375	0.5	0.5625	7.97425	7.29187	2.20987	12.0728	0.617108	0.630789	Chr4	+	32622668	32622735	gagttcccttcaagcacttcacatgacactatttcaatgtctattatgTGAAGTGTTTGGGGGAACTC	Y	1	osa-MIR395q,	osa-MIR395q	gagttcccttcaagcacttcacatgacactatttcaatgtctattatGTGAAGTGTTTGGGGGAACTC	1	osa-miR395b	GTGAAGTGTTTGGGGGAACTC	((((((((.(((((((((((((((((((.........))))....)))))))))))))))))))))))	41.2	-36	1.3
98	137	3'	osa-miR395r_L-1	TGAAGTGTTTGGGGGAACTC	20	Diff	7.54779	8.43015	2.375	13.375	0.5	0.5625	7.97425	7.29187	2.20987	12.0728	0.617108	0.630789	Chr4	+	32622811	32622878	gagttcccttcaaccacttcacgtggcactattttaggacctactatgTGAAGTGTTTGGGGGAACTC	Y	1	osa-MIR395r,	osa-MIR395r	gagttcccttcaaccacttcacgtggcactattttaggacctactatGTGAAGTGTTTGGGGGAACTC	1	osa-miR395b	GTGAAGTGTTTGGGGGAACTC	((((((((.((((.((((((((((((..(((...)))..))....)))))))))).))))))))))))	47.1	-32.3	1
99	138	3'	osa-miR395s_L-1	TGAAGTGTTTGGGGGAACTC	20	Diff	7.54779	8.43015	2.375	13.375	0.5	0.5625	7.97425	7.29187	2.20987	12.0728	0.617108	0.630789	Chr4	+	32622943	32623028	gtatcaccgtgaGTTCCCTTCAAGCACTTCACGtggcactatttcaatgcctattgTGAAGTGTTTGGGGGAACTCtcgatgttcc	Y	1	osa-MIR395s,	osa-MIR395s	gtatcaccgtgagttcccttcaagcacttcacgtggcactatttcaatgcctattGTGAAGTGTTTGGGGGAACTCtcgatgttcc	1	osa-miR395b	GTGAAGTGTTTGGGGGAACTC	....((.((.((((((((.((((((((((((((.((((.........))))...)))))))))))))))))))))).)).))....	47.7	-41.4	1
100	139	3'	osa-miR395y_L-1	TGAAGTGTTTGGGGGAACTC	20	Diff	7.54779	8.43015	2.375	13.375	0.5	0.5625	7.97425	7.29187	2.20987	12.0728	0.617108	0.630789	Chr8	+	3299815	3299924	tggccccaggaGTTCCTTGCAAGCACTTCACAtagaacttcagttactctcatacaacattgtgattttgagaagctattgTGAAGTGTTTGGGGGAACTCtcggtgcca	Y	1	osa-MIR395y,	osa-MIR395y	tggccccaggagttccttgcaagcacttcacatagaacttcagttactctcatacaacattgtgattttgagaagctattGTGAAGTGTTTGGGGGAACTCtcggtgcca	1	osa-miR395b	GTGAAGTGTTTGGGGGAACTC	.(((.((..(((((((...((((((((((((((((...(((((......(((((......)))))..)))))...))).)))))))))))))..)))))))..)).))).	45.5	-47	0.9
101	140	5'	osa-miR396a-5p	TTCCACAGCTTTCTTGAACTG	21	Yes	60.3333	41.8333	181.833	170.333	18	13.6667	63.7423	36.1848	169.191	153.749	22.2159	15.3258	Chr2	+	34280384	34280537	ctttgtgatcTTCCACAGCTTTCTTGAACTGcacgcatgatgaataatccctttggttaattgtgatctggtctctgagagatcgtagttagactcgatcggttgcattggcatcagagagagcaGTTCAATAAAGCTGTGGGAAAttgcagag	Y	1	osa-MIR396a,	osa-MIR396a	ctttgtgatcTTCCACAGCTTTCTTGAACTGcacgcatgatgaataatccctttggttaattgtgatctggtctctgagagatcgtagttagactcgatcggttgcattggcatcagagagagcaGTTCAATAAAGCTGTGGGAAattgcagag	1	osa-miR396a-5p	TTCCACAGCTTTCTTGAACTG	(((((..((.((((((((((((.(((((((((...((..((...(((((.....)))))))..))......(((((((..(((((.((.....)))))))...(((....))))))))))..))))))))).)))))))))))).))..)))))	43.5	-63.4	0.9
102	141	5'	osa-miR396a-5p	TTCCACAGCTTTCTTGAACTG	21	Yes	60.3333	41.8333	181.833	170.333	18	13.6667	63.7423	36.1848	169.191	153.749	22.2159	15.3258	Chr6	+	3669649	3669764	ctttgtggtcTTCCACAGCTTTCTTGAACTGcatctttgagagagattagcatccctatgtgtggattttgcttgcacgagtgtgcaGTTCAATAAAGCTGTGGGAAAttacagag	Y	1	osa-MIR396b,	osa-MIR396b	ctttgtggtcTTCCACAGCTTTCTTGAACTGcatctttgagagagattagcatccctatgtgtggattttgcttgcacgagtgtgcaGTTCAATAAAGCTGTGGGAAattacagag	1	osa-miR396a-5p	TTCCACAGCTTTCTTGAACTG	((((((..(.((((((((((((.((((((((((((((.(((..((((..((((......))))..))))..)))....))).))))))))))).)))))))))))).)..))))))	43.1	-50.6	1
103	142	5'	osa-miR396c-5p	TTCCACAGCTTTCTTGAACTT	21	Yes	228.333	138.333	352.333	148.333	76	81.6667	241.234	119.655	327.836	133.891	93.8004	91.5812	Chr2	-	34287873	34288013	tgccatgcctTTCCACAGCTTTCTTGAACTTctcttgtgcctcactcactttcattactggagagatatgcatcatcagtggaagcttatagggagaggagtgcaagaagaggGTCAAGAAAGCTGTGGGAAGAaatggca	Y	1	osa-MIR396c,	osa-MIR396c	tgccatgcctTTCCACAGCTTTCTTGAACTTctcttgtgcctcactcactttcattactggagagatatgcatcatcagtggaagcttatagggagaggagtgcaagaagagGGTCAAGAAAGCTGTGGGAAGaaatggca	1	osa-miR396c-5p	TTCCACAGCTTTCTTGAACTT	.(((((..(((((((((((((((((((.(((((((((..(..(.(((.(((((..(((((..((........))..))))))))......)).))).)..)..)))).))))).)))))))))))))))))))..))))).	46.1	-68	1
103	143	3'	osa-miR396c-3p_L-1R+1	GTCAAGAAAGCTGTGGGAAGA	21	Diff	12	4	8	3	4	5	12.678	3.4599	7.44378	2.70791	4.93686	5.60701	Chr2	-	34287873	34288013	tgccatgcctTTCCACAGCTTTCTTGAACTTctcttgtgcctcactcactttcattactggagagatatgcatcatcagtggaagcttatagggagaggagtgcaagaagaggGTCAAGAAAGCTGTGGGAAGAaatggca	Y	1	osa-MIR396c,	osa-MIR396c	tgccatgcctTTCCACAGCTTTCTTGAACTTctcttgtgcctcactcactttcattactggagagatatgcatcatcagtggaagcttatagggagaggagtgcaagaagagGGTCAAGAAAGCTGTGGGAAGaaatggca	1	osa-miR396c-3p	GGTCAAGAAAGCTGTGGGAAG	.(((((..(((((((((((((((((((.(((((((((..(..(.(((.(((((..(((((..((........))..))))))))......)).))).)..)..)))).))))).)))))))))))))))))))..))))).	46.1	-68	1
104	144	5'	osa-miR396e-5p	TCCACAGGCTTTCTTGAACTG	21	Yes	9795.5	5704	13660.5	3248	3834.5	5198	10349	4933.82	12710.7	2931.77	4732.6	5829.05	Chr4	+	34436812	34437003	aaagatgtgcgggcatgcttTCCACAGGCTTTCTTGAACTGtgaactcgtgggggtgtatgtgctcatgttgggattgtggtcggtggcctccaattctctgaaaagaaagctgaattgtcgagctccccgttctgtctttggtcgtctctacctgttgatgGTTCAAGAAAGCCCATGGAAAccatgccgc	Y	2	osa-MIR396e,osa-MIR396d,	osa-MIR396e	aaagatgtgcgggcatgcttTCCACAGGCTTTCTTGAACTGtgaactcgtgggggtgtatgtgctcatgttgggattgtggtcggtggcctccaattctctgaaaagaaagctgaattgtcgagctccccgttctgtctttg	0	osa-miR396d	TCCACAGGCTTTCTTGAACTG	........((.((((((.((((((..(((((((((((((..(.(((..((((((..(.....((((.....(((((((.(((.....)))..)))))))((....))..............))))...(((.........))).)..))))))..))).)..)))))))))))))..)))))).))))))))	50.5	-73.7	0.8
104	145	3'	osa-miR396e-3p_L-3	GTTCAAGAAAGCCCATGGAAA	21	Diff	1	4	2	0	0	1	1.0565	3.4599	1.86094	0	0	1.1214	Chr4	+	34436812	34437003	aaagatgtgcgggcatgcttTCCACAGGCTTTCTTGAACTGtgaactcgtgggggtgtatgtgctcatgttgggattgtggtcggtggcctccaattctctgaaaagaaagctgaattgtcgagctccccgttctgtctttggtcgtctctacctgttgatgGTTCAAGAAAGCCCATGGAAAccatgccgc	Y	2	osa-MIR396e,osa-MIR396d,	osa-MIR396e	gcgggcatgcttTCCACAGGCTTTCTTGAACTGtgaactcgtgggggtgtatgtgctcatgttgggattgtggtcggtggcctccaattctctgaaaagaaagctgaattgtcgagctccccgttctgtctttggtcgtctctacctgttgATGGTTCAAGAAAGCCCATGGAAAccatgccgc	0	osa-miR396e-3p	ATGGTTCAAGAAAGCCCATGGAAA	........((.((((((.((((((..(((((((((((((..(.(((..((((((..(.....((((.....(((((((.(((.....)))..)))))))((....))..............))))...(((.........))).)..))))))..))).)..)))))))))))))..)))))).))))))))	50.5	-73.7	0.8
105	146	5'	osa-miR396f-5p	TCCACAGGCTTTCTTGAACTG	21	Yes	9795.5	5704	13660.5	3248	3834.5	5198	10349	4933.82	12710.7	2931.77	4732.6	5829.05	Chr2	-	35636546	35636721	gccatgctcTCCACAGGCTTTCTTGAACTGtgaactcgtgtgtgcatgctcctcatatattgttctagatcccatgcatgatgcatatcgatcgatctgatctgaattaggtcatcgatgcgcatctggatccccatcttgttgatagttcAAGAAAGTCCTTGGAAAACatggtg	Y	1	osa-MIR396f,	osa-MIR396f	gccatgctcTCCACAGGCTTTCTTGAACTGtgaactcgtgtgtgcatgctcctcatatattgttctagatcccatgcatgatgcatatcgatcgatctgatctgaattaggtcatcgatgcgcatctggatccccatcttgttgATAGTTCAAGAAAGTCCTTGGAAAacatggtg	1	osa-miR396d	TCCACAGGCTTTCTTGAACTG	((((((...((((..((((((((((((((((.(((..(((.(((((((....((.............))...)))))))(((((..((((((.((((((((....))))))))))))))..)))))........)))...))).))))))))))))))))..))))...)))))).	44.9	-69.2	0.9
106	147	5'	osa-MIR397a-L-3R+3	TTGAGTGCAGCGTTGATGAAC	21	New	675	480.5	709.5	881	834.5	1157	713.138	415.621	660.17	795.224	1029.95	1297.46	Chr6	+	28489785	28489898	atcaaatgcatcaTTGAGTGCAGCGTTGATGAACaacggtaaccggtccatgttgatgcgcatttggccggtgatctgatcatcaTCAGCGCTTCACTCAATCATGcgtttggc	Y	1	osa-MIR397a,	osa-MIR397a	atcaaatgcaTCATTGAGTGCAGCGTTGATGaacaacggtaaccggtccatgttgatgcgcatttggccggtgatctgatcatcatcagcgcttcactcaatcatgcgtttggc	1	osa-MIR397a-p5	TTGAGTGCAGCGTTGATGaac	.((((((((((.((((((((.(((((((((((....(((..(((((((.((((......))))..)))))))...)))....))))))))))).)))))))).)))))))))).	48.2	-58	1.1
107	148	5'	osa-MIR397b-L-3R+4	TTGAGTGCAGCGTTGATGAACC	22	New	13328	10489.5	14976.5	13096	20093.5	23201	14081.1	9073.16	13935.2	11820.9	24799.7	26017.7	Chr2	-	3280781	3280898	agggaaggcattaTTGAGTGCAGCGTTGATGAACCtgccggccggctaaattaattagcaagaaagtctgaaactggctcaaaggtTCACCAGCACTGCACCCAATCacgcctttgct	Y	1	osa-MIR397b,	osa-MIR397b	agggaaggcaTTATTGAGTGCAGCGTTGATGaacctgccggccggctaaattaattagcaagaaagtctgaaactggctcaaaggttcaccagcactgcacccaatcacgcctttgct	1	osa-MIR397b-p5	TTGAGTGCAGCGTTGATGaacc	...((((((...((((.((((((.((((.(((((((...((((.(((((.....))))).((.....))......))))...))))))).)))).)))))).))))...))))))...	49.2	-48.3	0.8
107	149	3'	osa-MIR397b-p3	TCACCAGCACTGCACCCAATC	21	New	2311	1513	1469	1706	2741	2870	2441.57	1308.71	1366.86	1539.9	3382.98	3218.43	Chr2	-	3280781	3280898	agggaaggcattaTTGAGTGCAGCGTTGATGAACCtgccggccggctaaattaattagcaagaaagtctgaaactggctcaaaggtTCACCAGCACTGCACCCAATCacgcctttgct	Y	1	osa-MIR397b,	osa-MIR397b	agggaaggcaTTATTGAGTGCAGCGTTGATGaacctgccggccggctaaattaattagcaagaaagtctgaaactggctcaaaggttcaccagcactgcacccaatcacgcctttgct	1	osa-MIR397b-p3	tcaccagcactgcacccaatc	...((((((...((((.((((((.((((.(((((((...((((.(((((.....))))).((.....))......))))...))))))).)))).)))))).))))...))))))...	49.2	-48.3	0.8
108	150	5'	osa-MIR398a-p5	GGAGTGGTACTGAGAACACAGG	22	New	70	79	11	150	31	23	73.9551	68.333	10.2352	135.396	38.2607	25.7923	Chr10	-	9216250	9216364	gctgaacccagaGGAGTGGTACTGAGAACACAGGtgccaatacaatgtatggtgagctactgtataatggagtaattctgtaacTGTGTTCTCAGGTCACCCCTTtgggtttctt	Y	1	osa-MIR398a,	osa-MIR398a	gctgaacccagaggagtggtactgagaacacaggtgccaatacaatgtatggtgagctactgtataatggagtaattctgtaacTGTGTTCTCAGGTCACCCCTTtgggtttctt	1	osa-MIR398a-p5	ggagtggtactgagaacacagg	...(((((((((((.(((...((((((((((((.(((........((((..(((...)))..))))..(((....))).))).))))))))))))..))).)))))))))))...	45.2	-49.6	1
108	151	3'	osa-miR398a	TGTGTTCTCAGGTCACCCCTT	21	Yes	70	51.5	20.5	122	28.5	28	73.9551	44.5462	19.0747	110.122	35.1751	31.3993	Chr10	-	9216250	9216364	gctgaacccagaGGAGTGGTACTGAGAACACAGGtgccaatacaatgtatggtgagctactgtataatggagtaattctgtaacTGTGTTCTCAGGTCACCCCTTtgggtttctt	Y	1	osa-MIR398a,	osa-MIR398a	gctgaacccagaggagtggtactgagaacacaggtgccaatacaatgtatggtgagctactgtataatggagtaattctgtaacTGTGTTCTCAGGTCACCCCTTtgggtttctt	1	osa-miR398a	TGTGTTCTCAGGTCACCCCTT	...(((((((((((.(((...((((((((((((.(((........((((..(((...)))..))))..(((....))).))).))))))))))))..))).)))))))))))...	45.2	-49.6	1
109	152	5'	osa-MIR398b-p5	GGGGCGAGCTGGGAACACACG	21	New	1339	470	357	391	591	293	1414.66	406.538	332.179	352.932	729.421	328.571	Chr7	-	14598617	14598704	ggagttcctacaGGGGCGAGCTGGGAACACACGgtgatgaggcggtctggtctttcgTGTGTTCTCAGGTCGCCCCTGccgggactct	Y	1	osa-MIR398b,	osa-MIR398b	ggagttcctacaggggcgagctgggaacacacggtgatgaggcggtctggtctttcgTGTGTTCTCAGGTCGCCCCTGccgggactct	1	osa-MIR398b-p5	ggggcgagctgggaacacacg	((((((((..(((((((((.((((((((((((((....(((((......))))))))))))))))))).)))))))))..))))))))	62.5	-61.3	1.1
109	153	3'	osa-miR398b	TGTGTTCTCAGGTCGCCCCTG	21	Yes	1075	804.5	450.5	1186	783.5	504	1135.74	695.873	419.178	1070.53	967.008	565.187	Chr7	-	14598617	14598704	ggagttcctacaGGGGCGAGCTGGGAACACACGgtgatgaggcggtctggtctttcgTGTGTTCTCAGGTCGCCCCTGccgggactct	Y	1	osa-MIR398b,	osa-MIR398b	ggagttcctacaggggcgagctgggaacacacggtgatgaggcggtctggtctttcgTGTGTTCTCAGGTCGCCCCTGccgggactct	1	osa-miR398b	TGTGTTCTCAGGTCGCCCCTG	((((((((..(((((((((.((((((((((((((....(((((......))))))))))))))))))).)))))))))..))))))))	62.5	-61.3	1.1
110	154	3'	osa-miR399a	TGCCAAAGGAGAATTGCCCTG	21	Yes	1.33333	0.666667	0.666667	5	0.666667	0.666667	1.40867	0.57665	0.620315	4.51319	0.82281	0.747602	Chr1	+	30478636	30478784	ctgtgaattacagggcagttcacctttggcacaagggcaagcagtagaaaccatgcgtgcttgctagagctggaaatgatgctggtagcattgcatggttcagggatcacagatctcgTGCCAAAGGAGAATTGCCCTGcgattttgtc	Y	1	osa-MIR399a,	osa-MIR399a	ctgtgaattacagggcagttcacctttggcacaagggcaagcagtagaaaccatgcgtgcttgctagagctggaaatgatgctggtagcattgcatggttcagggatcacagatctcgTGCCAAAGGAGAATTGCCCTGcgattttgtc	1	osa-miR399a	TGCCAAAGGAGAATTGCCCTG	....((((..(((((((((((.((((((((((...(((((((((((.......))).)))))))).(((((......(((((.....)))))....))))).((((((...)))))))))))))))).)))))))))))..))))....	49.7	-68.3	0.9
111	155	3'	osa-miR399a	TGCCAAAGGAGAATTGCCCTG	21	Yes	1.33333	0.666667	0.666667	5	0.666667	0.666667	1.40867	0.57665	0.620315	4.51319	0.82281	0.747602	Chr2	-	7664026	7664122	gtgagaatcacaGTGCGATTCTCCTCTGGCATGgcatgagaggcctaaaaaagagacgcactgccgTGCCAAAGGAGAATTGCCCTGccattcagaa	Y	1	osa-MIR399b,	osa-MIR399b	gtgagaatcacagtgcgattctcctctggcatggcatgagaggcctaaaaaagagacgcactgccgTGCCAAAGGAGAATTGCCCTGccattcagaa	1	osa-miR399a	TGCCAAAGGAGAATTGCCCTG	....((((..(((.(((((((((((.((((((((((((......((.....)).....)).)))))))))).))))))))))).)))..))))....	51.5	-43.5	0.9
112	156	3'	osa-miR399a	TGCCAAAGGAGAATTGCCCTG	21	Yes	1.33333	0.666667	0.666667	5	0.666667	0.666667	1.40867	0.57665	0.620315	4.51319	0.82281	0.747602	Chr5	-	26305938	26306047	cggcgaattacagggcggtttctcctttggcacgtacggaggcaaggcatgcggtgaaaaatctctagctagccatgcgTGCCAAAGGAGAATTGCCCTGcgattcacca	Y	1	osa-MIR399c,	osa-MIR399c	cggcgaattacagggcggtttctcctttggcacgtacggaggcaaggcatgcggtgaaaaatctctagctagccatgcgTGCCAAAGGAGAATTGCCCTGcgattcacca	1	osa-miR399a	TGCCAAAGGAGAATTGCCCTG	.((.((((..((((((..(.((((((((((((((((.((.(((.(((.....(((.....)))))).)))..)).)))))))))))))))))..))))))..)))).)).	54.5	-58.7	1
113	157	5'	osa-MIR399d-p5	ACAGTAGTAGGCAGCTCTCC	20	New	6	15	4	38	15	35	6.33901	12.9746	3.72189	34.3002	18.5132	39.2491	Chr6	+	1561789	1562074	aagACAGTAGTAGGCAGCTCTCCtctggcaggtgcattctaggtgattttgtaattgtatatgcatccaaggtatatacagtccggccatggtgctacattgcaatcatccatatgtgattgcattgtgtatatatatacatggtggcctttgatagaccatcatatatcggttggttatgtgcatgtatgtatataccagctgctactagctttgatcgatcgccatgtagcgattgaattcaccaaaacggccTGCCAAAGGAGAGTTGCCCTGcgactgtctt	Y	1	osa-MIR399d,	osa-MIR399d	aagacagtagtaggcagctctcctctggcaggtgcattctaggtgattttgtaattgtatatgcatccaaggtatatacagtccggccatggtgctacattgcaatcatccatatgtgattgcattgtgtatatatatacatggtggcctttgatagaccatcatatatcggttggttatgtgcatgtatgtatataccagctgctactagctttgatcgatcgccatgtagcgattgaattcaccaaaacggccTGCCAAAGGAGAGTTGCCCTGcgactgtctt	1	osa-MIR399d-p5	acagtagtaggcagctctcc	((((((((.(((((((((((((((.((((((((........(((((.......(((((((((((.......)))))))))))..(((....((((.(((.(((((((((......))))))))).)))))))........(((((((.((.....)).)))))))....((((((((.(((((((....)))))))))))))))......)))....((((((((......))))))))..)))))......)))))))).)))))))))))).))).))))))))	43.4	-122.2	1
113	158	3'	osa-miR399d	TGCCAAAGGAGAGTTGCCCTG	21	Yes	62.5	125	43.5	102.5	84	119	66.0313	108.122	40.4755	92.5204	103.674	133.447	Chr6	+	1561789	1562074	aagACAGTAGTAGGCAGCTCTCCtctggcaggtgcattctaggtgattttgtaattgtatatgcatccaaggtatatacagtccggccatggtgctacattgcaatcatccatatgtgattgcattgtgtatatatatacatggtggcctttgatagaccatcatatatcggttggttatgtgcatgtatgtatataccagctgctactagctttgatcgatcgccatgtagcgattgaattcaccaaaacggccTGCCAAAGGAGAGTTGCCCTGcgactgtctt	Y	1	osa-MIR399d,	osa-MIR399d	aagacagtagtaggcagctctcctctggcaggtgcattctaggtgattttgtaattgtatatgcatccaaggtatatacagtccggccatggtgctacattgcaatcatccatatgtgattgcattgtgtatatatatacatggtggcctttgatagaccatcatatatcggttggttatgtgcatgtatgtatataccagctgctactagctttgatcgatcgccatgtagcgattgaattcaccaaaacggccTGCCAAAGGAGAGTTGCCCTGcgactgtctt	1	osa-miR399d	TGCCAAAGGAGAGTTGCCCTG	((((((((.(((((((((((((((.((((((((........(((((.......(((((((((((.......)))))))))))..(((....((((.(((.(((((((((......))))))))).)))))))........(((((((.((.....)).)))))))....((((((((.(((((((....)))))))))))))))......)))....((((((((......))))))))..)))))......)))))))).)))))))))))).))).))))))))	43.4	-122.2	1
114	159	3'	osa-miR399i	TGCCAAAGGAGAGCTGCCCTG	21	Yes	0	0	0	0	0	1	0	0	0	0	0	1.1214	Chr2	+	7650684	7650799	gtgagaatcacaGTGCAGTTCTCCTCTGGCATGgagggcaagaggagctgaatagctaatggatgataaactgctagcctttcccTGCCAAAGGAGAGCTGCCCTGccattcagtg	Y	1	osa-MIR399i,	osa-MIR399i	gtgagaatcacagtgcagttctcctctggcatggagggcaagaggagctgaatagctaatggatgataaactgctagcctttcccTGCCAAAGGAGAGCTGCCCTGccattcagtg	1	osa-miR399i	TGCCAAAGGAGAGCTGCCCTG	....((((..(((.(((((((((((.(((((.(((((((.((...((((....))))................)).))).)))).))))).))))))))))).)))..))))....	51.7	-48.8	0.8
115	160	5'	osa-MIR399j-p5	AGGGCTCCTCTCTCTTGGCAGGGA	24	New	1	5	0	4	2	7	1.0565	4.32488	0	3.61055	2.46843	7.84982	Chr4	+	28873121	28873226	agtccagtttcAGGGCTCCTCTCTCTTGGCAGGGAgcatgtgaagtcttttgtagctcactcattttcagccctcTGCCAAAGGAGAGTTGCCCTaaaactggact	Y	1	osa-MIR399j,	osa-MIR399j	agtccagtttcagggctcctctctcttggcagggagcatgtgaagtcttttgtagctcactcattttcagccctcTGCCAAAGGAGAGTTGCCCTAaaactggact	1	osa-MIR399j-p5	agggctcctctctcttggcaggga	((((((((((.(((((..(((((..(((((((((.((..(((((((........)))...)))).....)).)))))))))..)))))..))))).))))))))))	50	-55.6	1.1
115	161	3'	osa-miR399j_R-1	TGCCAAAGGAGAGTTGCCCT	20	Diff	20.5	30	7.5	35.5	11	29	21.6583	25.9493	6.97854	32.0437	13.5764	32.5207	Chr4	+	28873121	28873226	agtccagtttcAGGGCTCCTCTCTCTTGGCAGGGAgcatgtgaagtcttttgtagctcactcattttcagccctcTGCCAAAGGAGAGTTGCCCTaaaactggact	Y	1	osa-MIR399j,	osa-MIR399j	agtccagtttcagggctcctctctcttggcagggagcatgtgaagtcttttgtagctcactcattttcagccctcTGCCAAAGGAGAGTTGCCCTAaaactggact	1	osa-miR399j	TGCCAAAGGAGAGTTGCCCTA	((((((((((.(((((..(((((..(((((((((.((..(((((((........)))...)))).....)).)))))))))..)))))..))))).))))))))))	50	-55.6	1.1
116	162	5'	osa-miR408-5p_L+1R-1	ACAGGGATGAGGCAGAGCATG	21	Diff	2515	518	1153	262	415	238	2657.1	448.057	1072.83	236.491	512.199	266.894	Chr1	+	12301661	12301845	gggagttctgtgattggagaggagaggagACAGGGATGAGGCAGAGCATGggatggggctatcaacagatgtagattattccttgcacaagagatgatgatgagctgtgaatgagttctgagagatggctggtgttgttgttgctccctcccCTGCACTGCCTCTTCCCTGGCtcccctgcacac	Y	1	osa-MIR408,	osa-MIR408	gggagttctgtgattggagaggagaggagaCAGGGATGAGGCAGAGCATGGgatggggctatcaacagatgtagattattccttgcacaagagatgatgatgagctgtgaatgagttctgagagatggctggtgttgttgttgctccctcccCTGCACTGCCTCTTCCCTGGCtcccctgcacacctctctctctctctctctctctctgtgt	0	osa-miR408-5p	CAGGGATGAGGCAGAGCATGG	........((((...((........((((.((((((.(((((((.(((.((((.(((((...((((((...((((((((..(((....)))..)))))...(((((.......)))))..........)))...))))))..))))).)))).))).))))))).)))))).))))))..)))).	53	-73.1	0.7
116	163	3'	osa-miR408-3p	CTGCACTGCCTCTTCCCTGGC	21	Yes	12857	4420	4610	4394	3689	2353	13583.4	3823.19	4289.48	3966.19	4553.02	2638.66	Chr1	+	12301661	12301845	gggagttctgtgattggagaggagaggagACAGGGATGAGGCAGAGCATGggatggggctatcaacagatgtagattattccttgcacaagagatgatgatgagctgtgaatgagttctgagagatggctggtgttgttgttgctccctcccCTGCACTGCCTCTTCCCTGGCtcccctgcacac	Y	1	osa-MIR408,	osa-MIR408	gggagttctgtgattggagaggagaggagaCAGGGATGAGGCAGAGCATGGgatggggctatcaacagatgtagattattccttgcacaagagatgatgatgagctgtgaatgagttctgagagatggctggtgttgttgttgctccctcccCTGCACTGCCTCTTCCCTGGCtcccctgcacacctctctctctctctctctctctctgtgt	0	osa-miR408-3p	CTGCACTGCCTCTTCCCTGGC	........((((...((........((((.((((((.(((((((.(((.((((.(((((...((((((...((((((((..(((....)))..)))))...(((((.......)))))..........)))...))))))..))))).)))).))).))))))).)))))).))))))..)))).	53	-73.1	0.7
117	164	3'	osa-MIR439d-p3_L+4R-3	TCCCTGTCGAACCGCGGTTGTT	22	Diff	6.25	6.2	6.45	7.56667	6.9	3.95	6.60313	5.36285	6.00155	6.82996	8.51609	4.42954	Chr3	+	13698311	13698408	ccacctaccctgtcgaactcacgtagttcgacatgtACCTGTCGAACTGTGGTTGTTcgataggtaTCCCTGTCGAACCGCGGTTGTTcgatagggtg	Y	1	osa-MIR439d,	osa-MIR439d	ccacctaccctgtcgaactcacgtagttcgacatgtacctgtcgaactgtggttgttcgataggtatcccTGTCGAACCGCGGTTGTTCGAtagggtg	1	osa-MIR439d-p3	tcccTGTCGAACCGCGGTTGTT	.....(((((((((((((...((..((((((((.(((((((((((((.......)))))))))))))...))))))))..))...)))))))))))))	53.1	-57.9	1.1
118	165	3'	osa-MIR439g-p3_L+4R-3	TCCCTGTCGAACCGCGGTTGTT	22	New	6.75	6.2	6.95	7.31667	6.9	4.2	7.13138	5.36285	6.46678	6.6043	8.51609	4.70989	Chr8	+	3664228	3664315	tcctgtcgaactgacgcagttcgacatgtACCTGTCGAACTGTGGTTGTTcgataggtaTCCCTGTCGAACCGCGGTTGTTcgacagg	Y	1	osa-MIR439g,	osa-MIR439g	tcctgtcgaactgacgcagttcgacatgtacctgtcgaactgtggttgttcgataggtatcccTGTCGAACCGCGGTTGTTCGAcagg	1	osa-MIR439g-p3	tcccTGTCGAACCGCGGTTGTT	.((((((((((...(((.((((((((.(((((((((((((.......)))))))))))))...)))))))).)))...))))))))))	53.4	-54.9	1.2
119	166	3'	osa-MIR439h-p3_L-5R+5	AACCGCGGTTGTTCGACAGGG	21	New	10.75	13.7	7.95	14.3167	13.65	7.7	11.3574	11.8502	7.39725	12.9228	16.847	8.6348	Chr6	-	1553119	1553217	accacctaccctgtcgaactcacgcagttcgacatgtACCTGTCGAACTGTGGTTGTTcgataggtatccctgtcgAACCGCGGTTGTTCGACAGGGtg	Y	1	osa-MIR439h,	osa-MIR439h	accacctaccctgtcgaactcacgcagttcgacatgtacctgtcgaactgtggttgttcgataggtatcccTGTCGAACCGCGGTTGTTCGAcagggtg	1	osa-MIR439h-p3	AACCGCGGTTGTTCGAcaggg	......(((((((((((((...(((.((((((((.(((((((((((((.......)))))))))))))...)))))))).)))...)))))))))))))	54.5	-60.9	1.1
120	167	3'	osa-MIR439j-p3_L-6R+8	ACCGCGGTTGTTCGATAGGTACCC	24	Diff	0	2	4	0.666667	4	2	0	1.72995	3.72189	0.601759	4.93686	2.24281	Chr10	-	15809251	15809375	gcagggacatatccaacgggcagtgttcgataggggcgtggctacagtgacactacaatgtttttttctatttttaaaattatttaatcacatgtcgaACCGCGGTTGTTCGATAGGTACCCtgt	Y	1	osa-MIR439j,	osa-MIR439j	gcagggacatatccaacgggcagtgttcgataggggcgtggctacagtgacactacaatgtttttttctatttttaaaattatttaatcacaTGTCGAACCGCGGTTGTTCGAtaggtaccctgt	1	osa-MIR439j-p3	ACCGCGGTTGTTCGAtaggtaccc	((((((((.((((.((((....((((((((((..(((...)))...((((.........(((((...........))))).......)))).)))))))).))...)))).)))).)).))))))	43.2	-29.3	0.5
121	168	5'	osa-miR528-5p	TGGAAGGGGCATGCAGAGGAG	21	Yes	22027	9389	22770	7786	21130	12765	23271.6	8121.25	21186.9	7027.94	26079	14314.7	Chr3	+	1667328	1667415	agTGGAAGGGGCATGCAGAGGAGcaggagattcagtttgaagctggacttcacttttgcctctctctCCTGTGCTTGCCTCTTCCATT	Y	1	osa-MIR528,	osa-MIR528	agTGGAAGGGGCATGCAGAGGAGcaggagattcagtttgaagctggacttcacttttgcctctctctCCTGTGCTTGCCTCTTCCATT	1	osa-miR528-5p	TGGAAGGGGCATGCAGAGGAG	(((((((((((((.(((.(((((..(((((..(((..(((((.....)))))...)))..)))))))))).))).)))))))))))))	51.1	-46.2	1
121	169	3'	osa-miR528-3p	CCTGTGCTTGCCTCTTCCATT	21	Yes	2944	609	1005	176	317	602	3110.34	526.77	935.124	158.864	391.246	675.084	Chr3	+	1667328	1667415	agTGGAAGGGGCATGCAGAGGAGcaggagattcagtttgaagctggacttcacttttgcctctctctCCTGTGCTTGCCTCTTCCATT	Y	1	osa-MIR528,	osa-MIR528	agTGGAAGGGGCATGCAGAGGAGcaggagattcagtttgaagctggacttcacttttgcctctctctCCTGTGCTTGCCTCTTCCATT	1	osa-miR528-3p	CCTGTGCTTGCCTCTTCCATT	(((((((((((((.(((.(((((..(((((..(((..(((((.....)))))...)))..)))))))))).))).)))))))))))))	51.1	-46.2	1
122	170	5'	osa-miR530-5p_R+1	TGCATTTGCACCTGCACCTAC	21	Diff	20803	25401	11045	12235	6219	8834	21978.4	21971.2	10277.1	11043.8	7675.59	9906.47	Chr4	-	8303538	8303694	gtgatagagcTGCATTTGCACCTGCACCTACagagaggaagatgaagcagcaagctagcaatacgtgcttgatcgctatacgctagcttcttgcacacaatgttgttcctggtctcttcctgatccctAGGTGCAGAGGCAGATGCAACtatgtcat	Y	1	osa-MIR530,	osa-MIR530	gtgatagagcTGCATTTGCACCTGCACCTAcagagaggaagatgaagcagcaagctagcaatacgtgcttgatcgctatacgctagcttcttgcacacaatgttgttcctggtctcttcctgatccctAGGTGCAGAGGCAGATGCAACtatgtcat	1	osa-miR530-5p	TGCATTTGCACCTGCACCTA	((((((.((.(((((((((..(((((((((..((.(((((((.((..(((..(((.((((....((((..((..((((.....)))).))..))))....))))))).))).)))))))))..))..)))))))))..))))))))).)).))))))	48.4	-67.9	0.9
122	171	3'	osa-miR530-3p	AGGTGCAGAGGCAGATGCAAC	21	Yes	536	319	252	89	55	117	566.285	275.927	234.479	80.3348	67.8819	131.204	Chr4	-	8303538	8303694	gtgatagagcTGCATTTGCACCTGCACCTACagagaggaagatgaagcagcaagctagcaatacgtgcttgatcgctatacgctagcttcttgcacacaatgttgttcctggtctcttcctgatccctAGGTGCAGAGGCAGATGCAACtatgtcat	Y	1	osa-MIR530,	osa-MIR530	gtgatagagcTGCATTTGCACCTGCACCTAcagagaggaagatgaagcagcaagctagcaatacgtgcttgatcgctatacgctagcttcttgcacacaatgttgttcctggtctcttcctgatccctAGGTGCAGAGGCAGATGCAACtatgtcat	1	osa-miR530-3p	AGGTGCAGAGGCAGATGCAAC	((((((.((.(((((((((..(((((((((..((.(((((((.((..(((..(((.((((....((((..((..((((.....)))).))..))))....))))))).))).)))))))))..))..)))))))))..))))))))).)).))))))	48.4	-67.9	0.9
123	172	5'	osa-miR531a	CTCGCCGGGGCTGCGTGCCGCCAT	24	Yes	0	0	3.5	0.5	20	55.5	0	0	3.25665	0.451319	24.6843	62.2378	Chr8	-	1220358	1220438	ggcgccgccgagccttgCTCGCCGGGGCTGCGTGCCGCCATagctggcgcgcATCCCCGTCGAGCGTTGCtcgacggtgcc	N	1	osa-MIR531a,	osa-MIR531a	ggcgccgccgagccttgCTCGCCGGGGCTGCGTGCCGCCATagctggcgcgcatccccgtcgagcgttgctcgacggtgcc	1	osa-miR531a	CTCGCCGGGGCTGCGTGCCGCCAT	(((((((.(((((..((((((.(((((.((((((((((....)).)))))))).))))).))))))..))))).)))))))	76.5	-63.6	1
124	173	5'	osa-miR531b	CTCGCCGGGGCTGCGTGCCGCCAT	24	Yes	0	0	3.5	0.5	20	55.5	0	0	3.25665	0.451319	24.6843	62.2378	Chr1	-	833931	833999	ccgagccttgCTCGCCGGGGCTGCGTGCCGCCATaGCTGGTGCGCATCCCCGTCGAGCGttgctcgacg	Y	1	osa-MIR531b,	osa-MIR531b	ccgagccttgCTCGCCGGGGCTGCGTGCCGCCATagctggtgcgcatccccgtcgagcgttgctcgacg	1	osa-miR531a	CTCGCCGGGGCTGCGTGCCGCCAT	.(((((..((((((.(((((.((((..((((....)).))..)))).))))).))))))..)))))...	72.5	-46.8	0.9
124	174	3'	osa-MIR531b-p3	GCTGGTGCGCATCCCCGTCGAGCG	24	New	0	0	2.5	0	10	13	0	0	2.32618	0	12.3422	14.5782	Chr1	-	833931	833999	ccgagccttgCTCGCCGGGGCTGCGTGCCGCCATaGCTGGTGCGCATCCCCGTCGAGCGttgctcgacg	Y	1	osa-MIR531b,	osa-MIR531b	ccgagccttgCTCGCCGGGGCTGCGTGCCGCCATagctggtgcgcatccccgtcgagcgttgctcgacg	1	osa-MIR531b-p3	gctggtgcgcatccccgtcgagcg	.(((((..((((((.(((((.((((..((((....)).))..)))).))))).))))))..)))))...	72.5	-46.8	0.9
125	175	5'	osa-miR535-5p	TGACAACGAGAGAGAGCACGC	21	Yes	1857	2991	547	2510	634	677	1961.92	2587.14	508.968	2265.62	782.493	759.19	Chr11	-	16290530	16290623	ggcggTGACAACGAGAGAGAGCACGCcggtgcggcggtcacggtgagccggcccgcggcggcgtacctgcGTGCTTTCTCCCGTTGTCACTgcc	Y	1	osa-MIR535,	osa-MIR535	ggcggTGACAACGAGAGAGAGCACGCcggtgcggcggtcacggtgagccggcccgcggcggcgtacctgcGTGCTTTCTCCCGTTGTCACTgcc	1	osa-miR535-5p	TGACAACGAGAGAGAGCACGC	(((((((((((((.((((((((((((.((((((((((...(((....)))..)))).....)))))).)))))))))))).)))))))))))))	71.3	-68	1
125	176	3'	osa-miR535-3p	GTGCTTTCTCCCGTTGTCACT	21	Yes	116	232	28	177	38	76	122.554	200.674	26.0532	159.767	46.9002	85.2266	Chr11	-	16290530	16290623	ggcggTGACAACGAGAGAGAGCACGCcggtgcggcggtcacggtgagccggcccgcggcggcgtacctgcGTGCTTTCTCCCGTTGTCACTgcc	Y	1	osa-MIR535,	osa-MIR535	ggcggTGACAACGAGAGAGAGCACGCcggtgcggcggtcacggtgagccggcccgcggcggcgtacctgcGTGCTTTCTCCCGTTGTCACTgcc	1	osa-miR535-3p	GTGCTTTCTCCCGTTGTCACT	(((((((((((((.((((((((((((.((((((((((...(((....)))..)))).....)))))).)))))))))))).)))))))))))))	71.3	-68	1
126	177	5'	osa-miR810a	TCATAAGCCCACCACATGTGG	21	Yes	0	1	5	0	0	1	0	0.864975	4.65236	0	0	1.1214					aatattcactatggttgccaTCATAAGCCCACCACATGTGGctcgcatgcttaaataactaacggcataattagatcacttgatgacgacgtatatcggtgttcgctatatatactatctactggtaagtatatatagcgaacaccgatatgcgtcatcatcAAGTGATTTAATTATGCCGTTagttaagcatgcgagccacatgtggtgagcttacgatgacgaccacagtttgtt	Y	1	osa-MIR810a,	osa-MIR810a	aatattcactatggttgccaTCATAAGCCCACCACATGTGGctcgcatgcttaaataactaacggcataattagatcacttgatgacgacgtatatcggtgttcgctatatatactatctactggtaagtatatatagcgaacaccgatatgcgtcatcatcAAGTGATTTAATTATGCCGTTagttaagcatgcgagccacatgtggtgagcttacgatgacgaccacagtttgtt	1	osa-miR810a	TCATAAGCCCACCACATGTGG	.......(((.((((((.((((.(((((.((((((((((((((((((((((....(((((((((((((((((((((((((((((((.((((((((((((((((((((((((((((((((....))).))))))))))))))))))))))))))))).))))))))))))))))))))))))))))))))))))))))))))))))))))).))))).)))).)))))).))).....	40.5	-169	1.8
127	178	3'	osa-miR810b.1	TGAACACCGATATGCGTCATC	21	Yes	30	34	46	35	15	32	31.695	29.4092	42.8017	31.5923	18.5132	35.8849	Chr11	-	959574	959796	agcccaccacatgtggctcgcatgcttaaataactaacggcataattagatcacTTGATGACGACGTATATCGGTgttcgctatatatactatctactggtaagtatatctttaatatacttaccagtagatagtatatatagTGAACACCGATATGCGTCATCatcaagtgatttaattatgccgttagttaagcatgcgagccacatgtggtgagcttacg	Y	1	osa-MIR810b,	osa-MIR810b	agcccaccacatgtggctcgcatgcttaaataactaacggcataattagatcacttgatgacgacgtatatcggtgttcgctatatatactatctactggtaagtatatctttaatatacttaccagtagatagtatatatagTGAACACCGATATGCGTCATCatcAAGTGATTTAATTATGCCGTTagttaagcatgcgagccacatgtggtgagcttacg	1	osa-miR810b.1	TGAACACCGATATGCGTCATC	(((.((((((((((((((((((((((....(((((((((((((((((((((((((((((((.(((((((((((((((((((((((((((((((((((((((((((((((.....))))))))))))))))))))))))))))))))))))))))))))))).))))))))))))))))))))))))))))))))))))))))))))))))))))).)))....	38.6	-176.6	2.1
128	179	3'	osa-miR812k	ACGAACGGTTAAAGTTGGACGCGG	24	Yes	40.3333	42	42.5	22.8333	42.8333	40.5	42.6122	36.329	39.5451	20.6102	52.8656	45.4168					agtcataagtttccgcgcccaactttgatcgtccgtcttatttgaaatttttttataattagtattttttgttgttatgagataataaaatatgaatagtactttactcgtgacttatgtttttaattttttttaaaaaaattataaataagACGAACGGTTAAAGTTGGACGCGGaaaactatagct	Y	3	osa-MIR812m,osa-MIR812k,osa-MIR812l,	osa-MIR812l	agtacttcctccgtcctattttaagtgcaaccatatattttcgtattcaattttgatcgttcgtcttattttaatttttttgtaattaatatttttgttgttataagatgataaaacatgcatagtattttacgcgtgacttatgttttaaattttttctaaaatttttttaaataagACGAACGGTTAAAGTTGGACGCGGaaaattatggatgcacttaaagtgggatggagggagtatt	0	osa-miR812k	ACGAACGGTTAAAGTTGGACGCGG	((..(((..((((((((.((((((((((((((.((((((((((..((((((((((.((..(((..........((((((((....((((.(((.....))).))))))))))))...........)))..)).))))))))))..)))))))))).)))))))))))))).))))))))..)))..))	27.1	-64.5	1.3
129	180	5'	osa-miR812n-5p	AAGTGCAGCCATGAGTTTCCGTGC	24	Yes	28.25	37.75	35.5	23.8333	21.5	17.5	29.8462	32.6528	33.0318	21.5129	26.5356	19.6245					cttAAGTGCAGCCATGAGTTTCCGTGCccaactttatcgttcgtcttatttgaaatttttttatgattagtatttctattgttattagatgataaaacatgaatagtactttatgtgtgacttatgtttttattgtttttaaaaaaaattcaaataacacagacgatcaaagttgggcACGGAAAATCATGGCTGCACTTAAa	Y	3	osa-MIR812n,osa-MIR812t,osa-MIR812u,	osa-MIR812n	cttAAGTGCAGCCATGAGTTTCCGTGCccaactttatcgttcgtcttatttgaaatttttttatgattagtatttctattgttattagatgataaaacatgaatagtactttatgtgtgacttatgtttttattgtttttaaaaaaaattcaaataacacagacgatcaaagttgggcACGGAAAATCATGGCTGCACTTAAa	1	osa-miR812n-5p	AAGTGCAGCCATGAGTTTCCGTGC	.((((((((((((((((.((((((((((((((((((((((..((.(((((((((.((((((((....(((((..((((.......))))....(((((((((....(((.......)))..))))))))))))))....)))))))).))))))))).))..))))).))))))))))))))))).)))))))))))))))).	30	-90.5	1.5
130	181	5'	osa-miR812o-5p_L+4R-1_1ss10TC	TTTTCGTGTCCAACGTTTGACTGT	24	Diff	5	19	12	6.5	5.5	9.5	5.28251	16.4345	11.1657	5.86715	6.78819	10.6533					ggttttCGTGTTCAACGTTTGACTGTCtatcttatatgaaaatttttttattagtatttttattattgttagatgataaaacatgaataatactttatgcatgacttatctttttaatttttttcataatttttttaaataaaatGAACGGTCAAATGTTAGACACGGAaact	Y	1	osa-MIR812o,	osa-MIR812o	ggttttCGTGTTCAACGTTTGACTGTCtatcttatatgaaaatttttttattagtatttttattattgttagatgataaaacatgaataatactttatgcatgacttatctttttaatttttttcataatttttttaaataaaatGAACGGTCAAATGTTAGACACGGAaact	1	osa-miR812o-5p	CGTGTTCAACGTTTGACTGTC	(((((((((((..(((((((((((((..((.((((.((((((..((.....(((((....)))))..((((((.(((((..((((.((((....)))).))))..)))))..)))))).........))..)))))).)))).))..)))))))))))))..)))))))))))	22.5	-48.9	1.3
131	182	3'	osa-miR812s_1ss11AG	AAGACGGACAGTCAAACGTTGGAC	24	Diff	14	10.8333	6.5	10	9.5	17.5	14.791	9.37056	6.04807	9.02638	11.725	19.6245					tgggttttcgtgtacaacatgatcgttcgtcttatttgaaaattttatgaaaaaattaaaaaaatcacacataaagtactattcatattttatcatccaataataataaaaatactaatcacaaaagaatttttaatAAGACGGACAATCAAACGTTGGACacagaaattc	Y	2	osa-MIR812s,osa-MIR5799,	osa-MIR812s	tgggttttcgtgtacaacatgatcgttcgtcttatttgaaaattttatgaaaaaattaaaaaaatcacacataaagtactattcatattttatcatccaataataataaaaatactaatcacaaaagaatttttaatAAGACGGACAATCAAACGTTGGACacagaaattc	1	osa-miR812s	AAGACGGACAATCAAACGTTGGAC	.(..(((..((((.((((.((((.((((((((((((.(((((((((.(((..............)))...((((((((.......))))))))................................))))))))))))))))))))).))))...)))).))))..)))..)	25.1	-36	0.8
132	183	3'	osa-miR812v_L-1R-2_1ss15AG	TGGCTGCACTTAAGATGGGAC	21	Diff	4.5	1	4	5.5	2.5	8	4.75426	0.864975	3.72189	4.96451	3.08554	8.97122					actgcatcctccgttccaattttagtgaaaccataagtttccgtgcttaattttaactgtttattttatttaaattttttttataattagtatttttgttgttatgagatgataaaacataagtattactttatgcgtgacttatgtttttattttttttcaaataaaaaggacgattaaagttagatataaaaactcATGGCTGCACTTAAAATGGGACGGagagagtact	Y	1	osa-MIR812v,	osa-MIR812v	actgcatcctccgttccaattttagtgaaaccataagtttccgtgcttaattttaactgtttattttatttaaattttttttataattagtatttttgttgttatgagatgataaaacataagtattactttatgcgtgacttatgtttttattttttttcaaataaaaaggacgattaaagttagatataaaaactcATGGCTGCACTTAAAATGGGACGGagagagtact	1	osa-miR812v	ATGGCTGCACTTAAAATGGGACGG	..(((.((((((((((((.(((.((((...((((.(((((..(((..(((((((((..(((..((((((((.......(((((((((.............)))))))))....(((((((((((..(((.......))))))))))))))...........))))))))..)))..)))))))))..)))..))))).))))...)))).))).)))))))))).)))))..	26.7	-63.6	1
133	184	5'	osa-MIR814c-L-3R+3	TTCATAGTACAACGAATCTGGACA	24	New	2	11	12	10	10	12	2.113	9.51473	11.1657	9.02638	12.3422	13.4568	Chr2	-	10889672	10889754	accagatgtgacacTTCATAGTACAACGAATCTGGACAggAAGCATGTCCGGATTCGTTATACTataaagtgtcctattcggt	Y	1	osa-MIR814c,	osa-MIR814c	accagatgtgaCACTTCATAGTACAACGAATCTggacaggaagcatgtccggattcgttatactataaagtgtcctattcggt	1	osa-MIR814c-p5	TTCATAGTACAACGAATCTggaca	(((..((..(((((((.((((((.((((((((((((((.......)))))))))))))).)))))).)))))))..))..)))	42.2	-42.5	1.2
134	185	3'	osa-miR817_L-1R+1_1ss2CA	ACAACTTGAGGCCCGATTGAG	21	Diff	12	16	16	7	16	20	12.678	13.8396	14.8876	6.31847	19.7474	22.4281					tatctcaatcaggcctcaagttggtgtccgtcatggatgatggtcatccgtgacgggcTCCAACTTGAGGCCCGATTGAgata	Y	1	osa-MIR817,	osa-MIR817	tatctcaatcaggcctcaagttggtgtccgtcatggatgatggtcatccgtgacgggcTCCAACTTGAGGCCCGATTGAgata	1	osa-miR817	TCCAACTTGAGGCCCGATTGA	((((((((((.(((((((((((((.((((((((((((((.....)))))))))))))).))))))))))))).))))))))))	51.8	-67.9	1.6
135	186	3'	osa-miR818a_L+1R+1_1ss6CA	AAATCACTTATATTATGGGACGGA	24	Diff	0	4	0.5	1	3	2	0	3.4599	0.465236	0.902638	3.70265	2.24281	Chr4	-	29238529	29238792	aaaaaaagtagtactccctccgtcctataatataagtgattagtatcacatccctctaAAATCACTTATATTATGGGACAGAgggagtagttctcttttact	N	5	osa-MIR818d,osa-MIR818a,osa-MIR818b,osa-MIR818e,osa-MIR818c,	osa-MIR818c	ataatatactcatttcgtcctataatataagggattttgaagggatgtgacacatcctagctataaccatatatctagacatagctaggaacatatatctagacatgctcttgtctagatatatgtgttatatctctccaaAATCCCTTATATTATGGGACGGatgaatatgttat	0	osa-miR818a	AATCCCTTATATTATGGGACGG	...(((((.(((((((((((.((((((((((((((((((((((............)))..))))))))))))))))))).)))))))))...)))))))...	34.3	-45.3	1.3
136	187	5'	osa-miR820a_R+1	TCGGCCTCGTGGATGGACCAGG	22	Diff	26.3333	22	25.3333	11	24.5	23.5	27.8212	19.0295	23.572	9.92902	30.2383	26.353	Chr1	+	14130479	14130669	tgcgTCGGCCTCGTGGATGGACCAGGagctcaacattccttaaggttgttctttcaaacccatacaaggttccaccgcctgcattgttccaagagtgtcttggatgaaagtaggaagtggaaccttgttagggttggaacGAACTGCCTTAAGGAAGTCGATGCTccaggtccgtccaggaggacgactca	Y	1	osa-MIR820a,	osa-MIR820a	tgcgTCGGCCTCGTGGATGGACCAGgagctcaacattccttaaggttgttctttcaaacccatacaaggttccaccgcctgcattgttccaagagtgtcttggatgaaagtaggaagtggaaccttgttagggttggaacgaactgccttaaggaagtcgatgctccaggtccgtccaggaggacgactca	1	osa-miR820a	TCGGCCTCGTGGATGGACCAG	.(.((((.((((.((((((((((.(((((((.((.((((((((((..((((.(((.(((((..((((((((((((..(((((.((..((((((.....))))))..)).)))))..))))))))))))..))))).))).))))..)))))))))))).)).))))).)))))))))).)))).)))).).	51.3	-118.4	1.2
136	188	3'	osa-MIR820a-p3	GAACTGCCTTAAGGAAGTCGATGCT	25	New	31.1667	52	57.6667	18.8333	27.6667	50.3333	32.9276	44.9787	53.6572	16.9997	34.1466	56.4439	Chr1	+	14130479	14130669	tgcgTCGGCCTCGTGGATGGACCAGGagctcaacattccttaaggttgttctttcaaacccatacaaggttccaccgcctgcattgttccaagagtgtcttggatgaaagtaggaagtggaaccttgttagggttggaacGAACTGCCTTAAGGAAGTCGATGCTccaggtccgtccaggaggacgactca	Y	1	osa-MIR820a,	osa-MIR820a	tgcgTCGGCCTCGTGGATGGACCAGgagctcaacattccttaaggttgttctttcaaacccatacaaggttccaccgcctgcattgttccaagagtgtcttggatgaaagtaggaagtggaaccttgttagggttggaacgaactgccttaaggaagtcgatgctccaggtccgtccaggaggacgactca	1	osa-MIR820a-p3	gaactgccttaaggaagtcgatgct	.(.((((.((((.((((((((((.(((((((.((.((((((((((..((((.(((.(((((..((((((((((((..(((((.((..((((((.....))))))..)).)))))..))))))))))))..))))).))).))))..)))))))))))).)).))))).)))))))))).)))).)))).).	51.3	-118.4	1.2
137	189	5'	osa-miR820a_R+1	TCGGCCTCGTGGATGGACCAGG	22	Diff	26.3333	22	25.3333	11	24.5	23.5	27.8212	19.0295	23.572	9.92902	30.2383	26.353	Chr7	-	13120534	13120734	gtacatgcgTCGGCCTCGTGGATGGACCAGGagctcgacgttccttaaggccgttctttccgacccatacaaggttccgtcgcctgcattgttccaagagtgtcttggacgaaagcaggaagtggaaccttgttaaggtcggaacGAACTGCCTTAAGGAAGTCGATGCTttaggtccgtccacgaggacgacgcagctag	Y	1	osa-MIR820b,	osa-MIR820b	gtacatgcgTCGGCCTCGTGGATGGACCAGgagctcgacgttccttaaggccgttctttccgacccatacaaggttccgtcgcctgcattgttccaagagtgtcttggacgaaagcaggaagtggaaccttgttaaggtcggaacgaactgccttaaggaagtcgatgctttaggtccgtccacgaggacgacgcagctag	1	osa-miR820a	TCGGCCTCGTGGATGGACCAG	.....(((((((.(((((((((((((((..(((((((((.(((((((((((.((((.((((((((...(((((((((((...(((((.((((.(((((.....)))))))))..)))))...)))))))))))...)))))))).)))).)))))))))))))))).))))..))))))))))))))).))))))).....	54.7	-136.4	1.2
137	190	3'	osa-MIR820b-p3	GAACTGCCTTAAGGAAGTCGATGCT	25	New	56.1667	68	79.6667	33.8333	43.1667	68.3333	59.3402	58.8183	74.1276	30.5393	53.277	76.6292	Chr7	-	13120534	13120734	gtacatgcgTCGGCCTCGTGGATGGACCAGGagctcgacgttccttaaggccgttctttccgacccatacaaggttccgtcgcctgcattgttccaagagtgtcttggacgaaagcaggaagtggaaccttgttaaggtcggaacGAACTGCCTTAAGGAAGTCGATGCTttaggtccgtccacgaggacgacgcagctag	Y	1	osa-MIR820b,	osa-MIR820b	gtacatgcgTCGGCCTCGTGGATGGACCAGgagctcgacgttccttaaggccgttctttccgacccatacaaggttccgtcgcctgcattgttccaagagtgtcttggacgaaagcaggaagtggaaccttgttaaggtcggaacgaactgccttaaggaagtcgatgctttaggtccgtccacgaggacgacgcagctag	1	osa-MIR820b-p3	gaactgccttaaggaagtcgatgct	.....(((((((.(((((((((((((((..(((((((((.(((((((((((.((((.((((((((...(((((((((((...(((((.((((.(((((.....)))))))))..)))))...)))))))))))...)))))))).)))).)))))))))))))))).))))..))))))))))))))).))))))).....	54.7	-136.4	1.2
138	191	5'	osa-miR820a_R+1	TCGGCCTCGTGGATGGACCAGG	22	Diff	26.3333	22	25.3333	11	24.5	23.5	27.8212	19.0295	23.572	9.92902	30.2383	26.353	Chr10	+	6928681	6928871	tgcgTCGGCCTCGTGGATGGACCAGGagctcgacattccttaaggtcgttctttccgacccatacaaggttccgctgcctgcattgttccaagagtgtcttggacaaaagcaggaagtggaaccttgttaaggtcggaacGAACTGCCTTAAGGAAGTCGATGCTccaggtccgtccacgaggacgacgca	Y	1	osa-MIR820c,	osa-MIR820c	tgcgTCGGCCTCGTGGATGGACCAGgagctcgacattccttaaggtcgttctttccgacccatacaaggttccgctgcctgcattgttccaagagtgtcttggacaaaagcaggaagtggaaccttgttaaggtcggaacgaactgccttaaggaagtcgatgctccaggtccgtccacgaggacgacgca	1	osa-miR820a	TCGGCCTCGTGGATGGACCAG	.((((((.(((((((((((((((.((((((((((.((((((((((..((((.((((((((...(((((((((((((.(((((.((((.(((((.....)))))))))..))))).)))))))))))))...)))))))).))))..))))))))))))))).))))).))))))))))))))).)))))).	54.5	-142.3	1.4
138	192	3'	osa-MIR820c-p3	GAACTGCCTTAAGGAAGTCGATGCT	25	New	58.6667	70	72.6667	32.3333	41.1667	62.3333	61.9814	60.5483	67.6143	29.1853	50.8085	69.9008	Chr10	+	6928681	6928871	tgcgTCGGCCTCGTGGATGGACCAGGagctcgacattccttaaggtcgttctttccgacccatacaaggttccgctgcctgcattgttccaagagtgtcttggacaaaagcaggaagtggaaccttgttaaggtcggaacGAACTGCCTTAAGGAAGTCGATGCTccaggtccgtccacgaggacgacgca	Y	1	osa-MIR820c,	osa-MIR820c	tgcgTCGGCCTCGTGGATGGACCAGgagctcgacattccttaaggtcgttctttccgacccatacaaggttccgctgcctgcattgttccaagagtgtcttggacaaaagcaggaagtggaaccttgttaaggtcggaacgaactgccttaaggaagtcgatgctccaggtccgtccacgaggacgacgca	1	osa-MIR820c-p3	gaactgccttaaggaagtcgatgct	.((((((.(((((((((((((((.((((((((((.((((((((((..((((.((((((((...(((((((((((((.(((((.((((.(((((.....)))))))))..))))).)))))))))))))...)))))))).))))..))))))))))))))).))))).))))))))))))))).)))))).	54.5	-142.3	1.4
139	193	3'	osa-miR827a	TTAGATGACCATCAGCAAACA	21	Yes	54	142	165	450	145	286	57.0511	122.826	153.528	406.187	178.961	320.721	Chr2	-	23901158	23901295	ccatgaacctgTTTTGTTGCTGGTCATCTAGCTacccgtgcatgcctggagattggagaataattgacgatgcagcagtcggcttattggctcttgggcacgcgtggTTAGATGACCATCAGCAAACAagttcgtgag	Y	2	osa-MIR827b,osa-MIR827a,	osa-MIR827a	ttttgttgctggtcatctagctacccgtgcatgcctggagattggagaataattgacgatgcagcagtcggcttattggctcttgggcacgcgtggTTAGATGACCATCAGCAAACA	0	osa-miR827a	TTAGATGACCATCAGCAAACA	.(((((((.((.(((((((.(((((((((((((((.(((((.(((.((..(((((.....)))))..))..))).(((..((((....)))).))).))))).))))))))))))))).))))))))).)))))))..	50	-61.5	0.9
140	194	5'	osa-MIR1319a-L+3R-3	AAAAACCGGCATCTGTAATATATT	24	New	1	5	0	0	1	6	1.0565	4.32488	0	0	1.23422	6.72842	Chr11	-	702071	702191	tatgggtgtcggtttttaagaAAAAACCGGCATCTGTAATATATTataggtgtcggttaattaaaaaccgagacctataatatattATAAGTGCCGGTTTTTTTAAAACcgacacctatct	Y	1	osa-MIR1319a,	osa-MIR1319a	tatgggtgtcggtttttaagaaaaAACCGGCATCTGTAATATATTATAggtgtcggttaattaaaaaccgagacctataatatattataagtgccggtttttttaaaaccgacacctatct	1	osa-MIR1319a-p5	aaaAACCGGCATCTGTAATATATT	.(((((((((((((((...(((((((((((((..(((((((((((((((((.((((((.......)))))).)))))))))))))))))..))))))))))))))))))))))))))))..	33.1	-74	1.8
141	195	5'	osa-miR1320-5p	TGGAACGGAGGAATTTTATAG	21	Yes	22	485	40	1107	680	943	23.243	419.513	37.2189	999.22	839.267	1057.48	Chr6	-	5073507	5073602	ttaggcctacttTGGAACGGAGGAATTTTATAGgatttttgcgggaattttaacagattccTGTAAAATTCATTCGTTCCAAtgtagccctattag	Y	1	osa-MIR1320,	osa-MIR1320	ttaggcctacttTGGAACGGAGGAATTTTATAGgatttttgcgggaattttaacagattccTGTAAAATTCATTCGTTCCAAtgtagccctattag	1	osa-miR1320-5p	TGGAACGGAGGAATTTTATAG	.((((.((((.((((((((((.(((((((((((((..((((...(.....)..)))).))))))))))))).)))))))))).)))).))))....	36.5	-41.9	1.2
141	196	3'	osa-miR1320-3p	TGTAAAATTCATTCGTTCCAA	21	Yes	5	80	3	426	116.5	171	5.28251	69.198	2.79142	384.524	143.786	191.76	Chr6	-	5073507	5073602	ttaggcctacttTGGAACGGAGGAATTTTATAGgatttttgcgggaattttaacagattccTGTAAAATTCATTCGTTCCAAtgtagccctattag	Y	1	osa-MIR1320,	osa-MIR1320	ttaggcctacttTGGAACGGAGGAATTTTATAGgatttttgcgggaattttaacagattccTGTAAAATTCATTCGTTCCAAtgtagccctattag	1	osa-miR1320-3p	TGTAAAATTCATTCGTTCCAA	.((((.((((.((((((((((.(((((((((((((..((((...(.....)..)))).))))))))))))).)))))))))).)))).))))....	36.5	-41.9	1.2
142	197	5'	osa-miR1423a-5p_L-2R+2	GCAACTACACGTTGGGCGCTCGAT	24	Diff	922	971	579	409	1014	482	974.094	839.891	538.743	369.179	1251.49	540.516	Chr4	+	19715116	19715259	agcacaacactagtatttgggagGCAACTACACGTTGGGCGCTCGATccaggggtgggaaaatcgggcgcccacgttttccccacccccggatcgAGCGCCCAAGCGGTAGTTGTCTCCcaaatacttgtgctgtgcatgcatg	Y	2	osa-MIR1423b,osa-MIR1423a,	osa-MIR1423a	gcacaacactagtatttgggAGGCAACTACACGTTGGGCGCTCGatccaggggtgggaaaatcgggcgcccacgttttccccacccccggatcgAGCGCCCAAGCGGTAGTTGTCtcccaaatacttgtgctgtgc	0	osa-miR1423a-5p	AGGCAACTACACGTTGGGCGCTCG	.(((((.(((.((((((((((((((((((((.(((((((((((((((((.(((((((((((((.((....))..))))).)))))))).))))))))))))).)))))))))))))))))))))))).))).))))).......	57.6	-106	1.3
142	198	3'	osa-miR1423a-3p_R+3_1ss8AG	AGCGCCCGAGCGGTAGTTGTCTCC	24	Diff	1807	1286	503	339	946	349	1909.1	1112.36	468.027	305.994	1167.57	391.369	Chr4	+	19715116	19715259	agcacaacactagtatttgggagGCAACTACACGTTGGGCGCTCGATccaggggtgggaaaatcgggcgcccacgttttccccacccccggatcgAGCGCCCAAGCGGTAGTTGTCTCCcaaatacttgtgctgtgcatgcatg	Y	2	osa-MIR1423b,osa-MIR1423a,	osa-MIR1423a	gcacaacactagtatttgggAGGCAACTACACGTTGGGCGCTCGatccaggggtgggaaaatcgggcgcccacgttttccccacccccggatcgAGCGCCCAAGCGGTAGTTGTCtcccaaatacttgtgctgtgc	0	osa-miR1423a-3p	AGCGCCCAAGCGGTAGTTGTC	.(((((.(((.((((((((((((((((((((.(((((((((((((((((.(((((((((((((.((....))..))))).)))))))).))))))))))))).)))))))))))))))))))))))).))).))))).......	57.6	-106	1.3
143	199	5'	osa-miR1425-5p	TAGGATTCAATCCTTGCTGCT	21	Yes	3868	5382	1308	4272	1928	3398	4086.55	4655.3	1217.06	3856.07	2379.57	3810.53	Chr5	+	8862149	8862250	ctgttgactgcatTAGGATTCAATCCTTGCTGCTaaatgtattgcttatattcagcaatataatgttcagCAGCAAGAACTGGATCTTAATatagtcgatag	Y	1	osa-MIR1425,	osa-MIR1425	ctgttgactgcatTAGGATTCAATCCTTGCTGCTaaatgtattgcttatattcagcaatataatgttcagCAGCAAGAACTGGATCTTAATatagtcgatag	1	osa-miR1425-5p	TAGGATTCAATCCTTGCTGCT	(((((((((..(((((((((((...(((((((((.(((((((((((.......))))))))...))).)))))))))...)))))))))))..)))))))))	35.3	-45.5	1.3
143	200	3'	osa-miR1425-3p	CAGCAAGAACTGGATCTTAAT	21	Yes	20	8	3	20	11	17	21.13	6.9198	2.79142	18.0528	13.5764	19.0638	Chr5	+	8862149	8862250	ctgttgactgcatTAGGATTCAATCCTTGCTGCTaaatgtattgcttatattcagcaatataatgttcagCAGCAAGAACTGGATCTTAATatagtcgatag	Y	1	osa-MIR1425,	osa-MIR1425	ctgttgactgcatTAGGATTCAATCCTTGCTGCTaaatgtattgcttatattcagcaatataatgttcagCAGCAAGAACTGGATCTTAATatagtcgatag	1	osa-miR1425-3p	CAGCAAGAACTGGATCTTAAT	(((((((((..(((((((((((...(((((((((.(((((((((((.......))))))))...))).)))))))))...)))))))))))..)))))))))	35.3	-45.5	1.3
144	201	3'	osa-miR1427	TGCGGAACCGTGCGGTGGCGC	21	Yes	10	10	0	0	0	1	10.565	8.64975	0	0	0	1.1214	Chr8	+	9192581	9192837	tggctgcgcgcgaccgcgccgtcccgcaggccagcgccgcgccaccgcgcggTTCCGCAGCAGGGACATGCGCCacccgttacagccaactgaaatctgcactgatttgattacatgcgcacgtatatatgcagtgcatgcagcgagtgtgcgctgttcctggattcggtcgcgcgtggccgtgcTGCGGAACCGTGCGGTGGCGCggcgccggcctgcgggaccgcgcagtcgcgcgcagccaagccacgggaccg	Y	1	osa-MIR1427,	osa-MIR1427	tggctgcgcgcgaccgcgccgtcccgcaggccagcgccgcgccaccgcgcggttccgcagcagggacatgcgccacccgttacagccaactgaaatctgcactgatttgattacatgcgcacgtatatatgcagtgcatgcagcgagtgtgcgctgttcctggattcggtcgcgcgtggccgtgcTGCGGAACCGTGCGGTGGCGCggcgccggcctgcgggaccgcgcagtcgcgcgcagccaagccacgggaccg	1	osa-miR1427	TGCGGAACCGTGCGGTGGCGC	((((((((((((((.((((.((((((((((((.(((((((((((((((((((((((((((((.((.(((((((.(((.....(((.......(((((......)))))....(((.(((((((......((((.....)))).....))))))))))..))).....))).))))))).)).))))))))))))))))))))))))))))).)))))))))))).)))).)))))))))))))).....((....))	69.3	-190.5	1.1
145	202	5'	osa-MIR1428e-p5_1ss20CT_L+9R-9	CGCTTGGCGAATTCACAGGTCC	22	New	0	0.333333	1	0	4	0	0	0.288325	0.930472	0	4.93686	0	Chr3	+	23076870	23076979	gCGCTTGGCGAATTCACAGGCCCtatcttgtggtatgaactgggtacgcgatgatttgcactgcgtattgggggcttaccaTAAGATAATGCCATGAATTTGtcaagcgt	Y	1	osa-MIR1428e,	osa-MIR1428e	gcgcttggcgAATTCACAGGCCCTATCTTGTGgtatgaactgggtacgcgatgatttgcactgcgtattgggggcttaccaTAAGATAATGCCATGAATTTGtcaagcgt	1	osa-MIR1428e-p5	cgcttggcgAATTCACAGGCCC	((((((((((((((((..(((..((((((((((((....((..((((((..((.....))..))))))..))....))))))))))))..))).))))))))))))))))	48.2	-56.5	1.1
145	203	3'	osa-miR1428e-3p	TAAGATAATGCCATGAATTTG	21	Yes	0	1	0	2	0	0	0	0.864975	0	1.80528	0	0	Chr3	+	23076870	23076979	gCGCTTGGCGAATTCACAGGCCCtatcttgtggtatgaactgggtacgcgatgatttgcactgcgtattgggggcttaccaTAAGATAATGCCATGAATTTGtcaagcgt	Y	1	osa-MIR1428e,	osa-MIR1428e	gcgcttggcgAATTCACAGGCCCTATCTTGTGgtatgaactgggtacgcgatgatttgcactgcgtattgggggcttaccaTAAGATAATGCCATGAATTTGtcaagcgt	1	osa-miR1428e-3p	TAAGATAATGCCATGAATTTG	((((((((((((((((..(((..((((((((((((....((..((((((..((.....))..))))))..))....))))))))))))..))).))))))))))))))))	48.2	-56.5	1.1
146	204	5'	osa-miR1429-5p_R+3	GTAATATACTAATCCGTGCATCCA	24	Diff	4	14	16	8	5	20	4.22601	12.1097	14.8876	7.2211	6.17108	22.4281	Chr8	-	2036953	2037072	GTAATATACTAATCCGTGCATCCAtcgtatatcttacacgtcatgtgaacgtgcatcggttcataatgttgtgtttataaatgttaatggtatgtgtggTTGCACGGGTTTGTATGTTGC	Y	1	osa-MIR1429,	osa-MIR1429	GTAATATACTAATCCGTGCATccatcgtatatcttacacgtcatgtgaacgtgcatcggttcataatgttgtgtttataaatgttaatggtatgtgtgGTTGCACGGGTTTGTATGTTGc	1	osa-miR1429-5p	GTAATATACTAATCCGTGCAT	(((((((((.((((((((((.(((.(..(((((..((((..(((((((((........)))))).)))..))))..............)))))..)))).)))))))))).)))))))))	38.3	-44.4	1
146	205	3'	osa-miR1429-3p_L-1R+1	TTGCACGGGTTTGTATGTTGC	21	Diff	3	2	6	1	4	6	3.1695	1.72995	5.58283	0.902638	4.93686	6.72842	Chr8	-	2036953	2037072	GTAATATACTAATCCGTGCATCCAtcgtatatcttacacgtcatgtgaacgtgcatcggttcataatgttgtgtttataaatgttaatggtatgtgtggTTGCACGGGTTTGTATGTTGC	Y	1	osa-MIR1429,	osa-MIR1429	GTAATATACTAATCCGTGCATccatcgtatatcttacacgtcatgtgaacgtgcatcggttcataatgttgtgtttataaatgttaatggtatgtgtgGTTGCACGGGTTTGTATGTTGc	1	osa-miR1429-3p	GTTGCACGGGTTTGTATGTTG	(((((((((.((((((((((.(((.(..(((((..((((..(((((((((........)))))).)))..))))..............)))))..)))).)))))))))).)))))))))	38.3	-44.4	1
147	206	5'	osa-miR1318-5p_L+1R+1	ATCAGGAGAGATGACACCGACA	22	Diff	3095	12327	2353	6307	5527	8725	3269.87	10662.5	2189.4	5692.94	6821.51	9784.24	Chr7	-	23401681	23401839	ggatgtgcgttcttgtggggggtttgggccctgtgATCAGGAGAGATGACACCGACAtcgccggaattcgttcttggtcttgtgccatgatgaattgatggtccgtttgatgCAGGTGTCATCTCCCCTGAACataggactgactgaccctgaatggat	Y	2	osa-MIR1318,osa-MIR1432,	osa-miR1432-5p	cctgtgaTCAGGAGAGATGACACCGACatcgccggaattcgttcttggtcttgtgccatgatgaattgatggtccgtttgatgCAGGTGTCATCTCCCCTGAACatagg	0	osa-miR1318-5p	TCAGGAGAGATGACACCGAC	....((.(((((......((((((..((.((((((.(((((.(((((((((((..(((((.(((((((((((..((((.....)))).)))))))......))))..)))))..))))))))))).))))).)))))).))....))))))))))).))	52.2	-69.3	0.8
147	207	3'	osa-miR1318-3p	CAGGTGTCATCTCCCCTGAAC	21	Yes	21	72	17	14	10	11	22.1865	62.2782	15.818	12.6369	12.3422	12.3354	Chr7	-	23401681	23401839	ggatgtgcgttcttgtggggggtttgggccctgtgATCAGGAGAGATGACACCGACAtcgccggaattcgttcttggtcttgtgccatgatgaattgatggtccgtttgatgCAGGTGTCATCTCCCCTGAACataggactgactgaccctgaatggat	Y	2	osa-MIR1318,osa-MIR1432,	osa-miR1432-3p	cctgtgaTCAGGAGAGATGACACCGACatcgccggaattcgttcttggtcttgtgccatgatgaattgatggtccgtttgatgCAGGTGTCATCTCCCCTGAACatagg	0	osa-miR1318-3p	CAGGTGTCATCTCCCCTGAAC	....((.(((((......((((((..((.((((((.(((((.(((((((((((..(((((.(((((((((((..((((.....)))).)))))))......))))..)))))..))))))))))).))))).)))))).))....))))))))))).))	52.2	-69.3	0.8
148	208	3'	osa-miR1436_L-2R+1	ATTATGGGACGGAGGGAGTA	20	Diff	1	3.25	3.5	4	3.33333	0.416667	1.0565	2.81117	3.25665	3.61055	4.11405	0.467251					agtttatgtgctactccctccgtcccataatattaaaacctaggactggataggacgtttcatagtacaatgactcagagtcattgtactatgaaacgtcctatccagtcctaggttttaACATTATGGGACGGAGGGAGTagtctcaacctatataaact	Y	2	osa-MIR1436,hvu-MIR1436,	osa-MIR1436	agtttatgtgctactccctccgtcccataatattaaaacctaggactggataggacgtttcatagtacaatgactcagagtcattgtactatgaaacgtcctatccagtcctaggttttaACATTATGGGACGGAGGGAGTagtctcaacctatataaact	1	osa-miR1436	ACATTATGGGACGGAGGGAGT	(((((((((((((((((((((((((((((((.((((((((((((((((((((((((((((((((((((((((((.....)))))))))))))))))))))))))))))))))))))))))).))))))))))))))))))))))........)))))))))	40.4	-124.2	1.9
149	209	5'	osa-MIR1437-p5	TGCGGCACCGGAGCTCGCCAGC	22	New	208	176	175	75	246	160	219.752	152.236	162.833	67.6979	303.617	179.424	Chr8	+	3955902	3956089	gcgcgcggggagggagggaacggtgcctagTGCGGCACCGGAGCTCGCCAGCacgcaggagtgaggtgaggaggacggcggccagggcgcggagagcttgccggcgctccgccaccgccgctacctccttccgcgtgctggcgagctccggcgccgcaCTAGGCACTGTTTCCTCCCTCcccacgcgc	Y	1	osa-MIR1437,	osa-MIR1437	gcgcgcggggagggagggaacggtgcctagtgcggcaccggagctcgccagcacgcaggagtgaggtgaggaggacggcggccagggcgcggagagcttgccggcgctccgccaccgccgctacctccttccgcgtgctggcgagcTCCGGCGCCGCACTAGGCACTGtttcctccctccccacgcgc	1	osa-MIR1437-p5	tgcggcaccggagctcgccagc	(((((.((((((((((((((((((((((((((((((.(((((((((((((((((((.(((........((((((..((((((..((..((((((.(((....))).))))))..)))))))).)))))))))))))))))))))))))))).)))))))))))))))))))))))))))))).)))))	74.5	-169	1.2
149	210	3'	osa-MIR1437-p3	CTAGGCACTGTTTCCTCCCTC	21	New	137	140	122	137	104	111	144.741	121.097	113.518	123.661	128.358	124.476	Chr8	+	3955902	3956089	gcgcgcggggagggagggaacggtgcctagTGCGGCACCGGAGCTCGCCAGCacgcaggagtgaggtgaggaggacggcggccagggcgcggagagcttgccggcgctccgccaccgccgctacctccttccgcgtgctggcgagctccggcgccgcaCTAGGCACTGTTTCCTCCCTCcccacgcgc	Y	1	osa-MIR1437,	osa-MIR1437	gcgcgcggggagggagggaacggtgcctagtgcggcaccggagctcgccagcacgcaggagtgaggtgaggaggacggcggccagggcgcggagagcttgccggcgctccgccaccgccgctacctccttccgcgtgctggcgagcTCCGGCGCCGCACTAGGCACTGtttcctccctccccacgcgc	1	osa-MIR1437-p3	CTAGGCACTGtttcctccctc	(((((.((((((((((((((((((((((((((((((.(((((((((((((((((((.(((........((((((..((((((..((..((((((.(((....))).))))))..)))))))).)))))))))))))))))))))))))))).)))))))))))))))))))))))))))))).)))))	74.5	-169	1.2
150	211	5'	osa-MIR1440a-p5_1ss2AG	TGCCACCCGGGCCCACATGTC	21	New	20	33	46.5	14	130.5	90	21.13	28.5442	43.267	12.6369	161.065	100.926	Chr9	-	5980506	5980694	aaatgccaatgctcaaataccactctcctaaatttccattcccaaaTACCACCCGGGCCCACATGTCagcctcatccagcacagggtcccacatcacttttgtttgaatggaaagtgaggctgacatgtgggcccggatggtatttggtaatgaaaatTTGGGAGAGTGGTATTTGAGCactggcattt	Y	1	osa-MIR1440a,	osa-MIR1440a	aaatgccaaTGCTCAAATACCACTCTCCTaaatttccattcccaaataccacccgggcccacatgtcagcctcatccagcacagggtcccacatcacttttgtttgaatggaaagtgaggctgacatgtgggcccggatggtatttggtaatgaaaatttgggagagtggtatttgagcactggcattt	1	osa-MIR1440a-p5	taccacccgggcccacatgtc	((((((((.((((((((((((((((((((((((((.((((.((((((((((.((((((((((((((((((((((((((..(((..(...........)..))).....))))...)))))))))))))))))))))).)))))))))).)))).)))))))))))))))))))))))))).))))))))	46.6	-131.1	1.5
150	212	3'	osa-MIR1440a-p3_1ss13TC	TTGGGAGAGTGGCATTTGAGC	21	New	21.5	26.5	83	16.5	125	146.5	22.7148	22.9218	77.2292	14.8935	154.277	164.285	Chr9	-	5980506	5980694	aaatgccaatgctcaaataccactctcctaaatttccattcccaaaTACCACCCGGGCCCACATGTCagcctcatccagcacagggtcccacatcacttttgtttgaatggaaagtgaggctgacatgtgggcccggatggtatttggtaatgaaaatTTGGGAGAGTGGTATTTGAGCactggcattt	Y	1	osa-MIR1440a,	osa-MIR1440a	aaatgccaaTGCTCAAATACCACTCTCCTaaatttccattcccaaataccacccgggcccacatgtcagcctcatccagcacagggtcccacatcacttttgtttgaatggaaagtgaggctgacatgtgggcccggatggtatttggtaatgaaaatttgggagagtggtatttgagcactggcattt	1	osa-MIR1440a-p3	ttgggagagtggtatttgagc	((((((((.((((((((((((((((((((((((((.((((.((((((((((.((((((((((((((((((((((((((..(((..(...........)..))).....))))...)))))))))))))))))))))).)))))))))).)))).)))))))))))))))))))))))))).))))))))	46.6	-131.1	1.5
151	213	3'	osa-MIR1440b-p3	AGGCTGACATGTGGGCCCGGGT	22	New	14.5	16.5	35	6.5	62	40.5	15.3193	14.2721	32.5665	5.86715	76.5214	45.4168	Chr9	+	5980506	5980693	aaatgccagtgctcaaataccactctcccaaattttcattaccaaataccatccgggcccacatgtcagcctcactttccATTCAAACAAAAGTGATGTGGGACcctgtgctggatgAGGCTGACATGTGGGCCCGGGTggtatttgggaatggaaatttaggagagtggtatttgagcattggcatt	Y	1	osa-MIR1440b,	osa-MIR1440b	aaatgccagtgctcaaataccactctcccaaattttcattaccaaataccatccgggcccacatgtcagcctcactttccattcaaacaaaagtgatgtgggaccctgtgctggatgaggctgacatgtgggcccgggtggtatttgggaatggaaaTTTAGGAGAGTGGTATTTGAGcattggcatt	1	osa-MIR1440b-p3	aggctgacatgtgggcccgggt	.(((((((((((((((((((((((((((.(((((((((((.(((((((((((((((((((((((((((((((((..(((((((((........))).)))))).((......)).))))))))))))))))))))))))))))))))).))))))))))).)))))))))))))))))))))))))))	46.8	-138.8	1.6
152	214	5'	osa-miR1846a-5p	AGTGAGGAGGCCGGGGCCGCT	21	Yes	13.3333	9.16667	2.75	4.25	5.58333	8.83333	14.0867	7.92894	2.5588	3.83621	6.89104	9.90572	Chr10	+	529274	529385	ccgctccctaccaatgagccgccggatctcccAGTGAGGAGGCCGGGGCCGCTggatccggTGACCCCGTTCTCCTCGCCGGcggatccggcgctccagagaaaggaacgag	Y	1	osa-MIR1846a,	osa-MIR1846a	ccgctccctaccaatgagccgccggatctcccAGTGAGGAGGCCGGGGCCGCTggatccggTGACCCCGTTCTCCTCGCCGGcggatccggcgctccagagaaaggaacgag	1	osa-miR1846a-5p	AGTGAGGAGGCCGGGGCCGCT	.((.(((........(((.(((((((((..((.((((((((..(((((.(((((....))))).)))))..)))))))).))..))))))))))))........))).))..	69.6	-68.1	0.9
152	215	3'	osa-miR1846a-3p	TGACCCCGTTCTCCTCGCCGG	21	Yes	6.5	12.5	0.5	8.33333	0	3.5	6.86726	10.8122	0.465236	7.52198	0	3.92491	Chr10	+	529274	529385	ccgctccctaccaatgagccgccggatctcccAGTGAGGAGGCCGGGGCCGCTggatccggTGACCCCGTTCTCCTCGCCGGcggatccggcgctccagagaaaggaacgag	Y	1	osa-MIR1846a,	osa-MIR1846a	ccgctccctaccaatgagccgccggatctcccAGTGAGGAGGCCGGGGCCGCTggatccggTGACCCCGTTCTCCTCGCCGGcggatccggcgctccagagaaaggaacgag	1	osa-miR1846a-3p	TGACCCCGTTCTCCTCGCCGG	.((.(((........(((.(((((((((..((.((((((((..(((((.(((((....))))).)))))..)))))))).))..))))))))))))........))).))..	69.6	-68.1	0.9
153	216	5'	osa-miR1846a-5p	AGTGAGGAGGCCGGGGCCGCT	21	Yes	13.3333	9.16667	2.75	4.25	5.58333	8.83333	14.0867	7.92894	2.5588	3.83621	6.89104	9.90572	Chr11	-	27715822	27715933	ccgctccctaccaatgagccgccggatctcccAGTGAGGAGGCCGGGGCCGCTggatccagTGACCCCGTTCTCCTCGCCGGcggatccggagctccagagaaaggaacgag	Y	1	osa-MIR1846b,	osa-MIR1846b	ccgctccctaccaatgagccgccggatctcccAGTGAGGAGGCCGGGGCCGCTggatccagTGACCCCGTTCTCCTCGCCGGcggatccggagctccagagaaaggaacgag	1	osa-miR1846a-5p	AGTGAGGAGGCCGGGGCCGCT	.((.(((........((((..(((((((..((.((((((((..(((((.(((((....))))).)))))..)))))))).))..))))))).))))........))).))..	67.9	-65.2	0.9
153	217	3'	osa-miR1846a-3p	TGACCCCGTTCTCCTCGCCGG	21	Yes	6.5	12.5	0.5	8.33333	0	3.5	6.86726	10.8122	0.465236	7.52198	0	3.92491	Chr11	-	27715822	27715933	ccgctccctaccaatgagccgccggatctcccAGTGAGGAGGCCGGGGCCGCTggatccagTGACCCCGTTCTCCTCGCCGGcggatccggagctccagagaaaggaacgag	Y	1	osa-MIR1846b,	osa-MIR1846b	ccgctccctaccaatgagccgccggatctcccAGTGAGGAGGCCGGGGCCGCTggatccagTGACCCCGTTCTCCTCGCCGGcggatccggagctccagagaaaggaacgag	1	osa-miR1846a-3p	TGACCCCGTTCTCCTCGCCGG	.((.(((........((((..(((((((..((.((((((((..(((((.(((((....))))).)))))..)))))))).))..))))))).))))........))).))..	67.9	-65.2	0.9
154	218	5'	osa-miR1846a-5p	AGTGAGGAGGCCGGGGCCGCT	21	Yes	13.3333	9.16667	2.75	4.25	5.58333	8.83333	14.0867	7.92894	2.5588	3.83621	6.89104	9.90572	Chr12	+	270780	270865	atgagccgccggatctcccAGTGAGGAGGCCGGGGCCGCTgaatccggtgaccccGGTCTGCTCGCTGGCggatccggcgcaaaga	Y	1	osa-MIR1846c,	osa-MIR1846c	atgagccgccggatctcccAGTGAGGAGGCCGGGGCCGCTgaatccggTGACCCCGGTCTGCTCGCTGGcggatccggcgcaaaga	1	osa-miR1846a-5p	AGTGAGGAGGCCGGGGCCGCT	....(.(((((((((..((((((((.(((((((((.(((((....))))).))))))))).))))))))..)))))))))).....	69.8	-64.1	1.1
155	219	5'	osa-miR1846d-5p_R-1	TCCCACCGAGCAGCCGGATCT	21	Diff	60	58	27	43	58	53	63.3901	50.1686	25.1227	38.8134	71.5845	59.4343	Chr1	+	39637065	39637180	tgcctgtcccTCCCACCGAGCAGCCGGATCTcccagtgagtaggcccgggccgccagatccggtgaccccggtctcctcgccggtGTATCCGGCGCCGCAGGGAGGgacgagagcc	Y	1	osa-MIR1846d,	osa-MIR1846d	tgcctgtcccTCCCACCGAGCAGCCGGATCTCccagtgagtaggcccgggccgccagatccggtgaccccggtctcctcgccggtgTATCCGGCGCCGCAGGGAGGgacgagagcc	1	osa-miR1846d-5p	TCCCACCGAGCAGCCGGATCTC	.(((((((((((((..((.((.(((((((...((.(((((.(((((.(((.((((......)))).))).))))).))))).))...)))))))))))..))))))))).)).)).	72.4	-70.5	0.8
155	220	3'	osa-miR1846d-3p_L+1	GTATCCGGCGCCGCAGGGAGG	21	Diff	66	108	32	75.3333	101	62	69.7291	93.4173	29.7751	67.9987	124.656	69.527	Chr1	+	39637065	39637180	tgcctgtcccTCCCACCGAGCAGCCGGATCTcccagtgagtaggcccgggccgccagatccggtgaccccggtctcctcgccggtGTATCCGGCGCCGCAGGGAGGgacgagagcc	Y	1	osa-MIR1846d,	osa-MIR1846d	tgcctgtcccTCCCACCGAGCAGCCGGATCTCccagtgagtaggcccgggccgccagatccggtgaccccggtctcctcgccggtgTATCCGGCGCCGCAGGGAGGgacgagagcc	1	osa-miR1846d-3p	TATCCGGCGCCGCAGGGAGG	.(((((((((((((..((.((.(((((((...((.(((((.(((((.(((.((((......)))).))).))))).))))).))...)))))))))))..))))))))).)).)).	72.4	-70.5	0.8
156	221	5'	osa-miR1846e_L-1R+3	AACGAGGAGGCCGGGACCACCG	22	Diff	267	322	168.25	321.25	301.25	370	282.086	278.522	156.552	289.972	371.807	414.919	Chr9	-	13211437	13211505	cgcatccgccAACGAGGAGGCCGGGACCACCGgatccGGTGACTCCGGCCTCCTCGCCggcagatccgg	Y	1	osa-MIR1846e,	osa-MIR1846e	cgcatccgcCAACGAGGAGGCCGGGACCAccggatccggtgactccggcctcctcgccggcagatccgg	1	osa-miR1846e	CAACGAGGAGGCCGGGACCA	((.(((.(((..(((((((((((((..(((((....)))))..)))))))))))))..))).))).)).	73.9	-48.4	0.9
156	222	3'	osa-MIR1846e-p3	GGTGACTCCGGCCTCCTCGCC	21	New	33	40	10	43	35	26	34.8645	34.599	9.30472	38.8134	43.1975	29.1565	Chr9	-	13211437	13211505	cgcatccgccAACGAGGAGGCCGGGACCACCGgatccGGTGACTCCGGCCTCCTCGCCggcagatccgg	Y	1	osa-MIR1846e,	osa-MIR1846e	cgcatccgcCAACGAGGAGGCCGGGACCAccggatccggtgactccggcctcctcgccggcagatccgg	1	osa-MIR1846e-p3	ggtgactccggcctcctcgcc	((.(((.(((..(((((((((((((..(((((....)))))..)))))))))))))..))).))).)).	73.9	-48.4	0.9
157	223	3'	osa-MIR1847-p3	CAACTGCAAACTACATAAAGT	21	New	2	2	3	2	1	5	2.113	1.72995	2.79142	1.80528	1.23422	5.60701	Chr1	+	20332837	20333097	accggatgagactccctaacTTTGTGCAGTTTGCAGTTGTGgnnnnnnnnnnnnnnnnnnnnnnnnnnnnnnnnnnnnnnnnngccaCAACTGCAAACTACATAAAGTcaggggatctgtttcccta	Y	1	osa-MIR1847,	osa-MIR1847	agactccctaactttgTGCAGTTTGCAGTTGTGGCACtgacatatgggccagacacattTGGCCCACATGTTAGTGCCACAACtgcaaactacataaagtcaggggatct	0	osa-MIR1847-p3	CAACtgcaaactacataaagt	...(((..(((..((((.((((((((.(((((((((((((((..........................................))))))))))))))).)))))))).))))..)))...)))...	32.3	-46.237	1.1
158	224	5'	osa-miR1848	CCTCGCCGGCGCGCGCGTGCA	21	Yes	1	5	1	1	0	1	1.0565	4.32488	0.930472	0.902638	0	1.1214					ccgcgggcccCCTCGCCGGCGCGCGCGTGCAggtgtgcgcgcggccgtcgagtggctcctagg	Y	1	osa-MIR1848,	osa-MIR1848	ccgcgggcccCCTCGCCGGCGCGCGCGTGCAggtgtgcgcgcggccgtcgagtggctcctagg	1	osa-miR1848	CCTCGCCGGCGCGCGCGTGCA	((..(((((..((((.((((.((((((..(....)..)))))))))).)))).)))))...))	82.5	-40.4	0.8
159	225	5'	osa-MIR1849-p5	ACCTAGGATATGATGGGACATTACC	25	New	2	2	4	4	1	1	2.113	1.72995	3.72189	3.61055	1.23422	1.1214	Chr4	+	22224813	22224902	aaataagctaACCTAGGATATGATGGGACATTACCtatctagattcgttgtactaggtAATGCCCTATCGTATCCTAGGTTGgtttattt	Y	1	osa-MIR1849,	osa-MIR1849	aaataagctaacctaggatatgatgggacattacctatctagattcgttgtactaggtaatgcccTATCGTATCCTAGGTTGGTTTattt	1	osa-MIR1849-p5	acctaggatatgatgggacattacc	(((((((((((((((((((((((((((.(((((((((....((....))....))))))))).)))))))))))))))))))))))))))	36.7	-51.1	1.5
159	226	3'	osa-MIR1849-p3	AATGCCCTATCGTATCCTAGGTTG	24	New	1	6	10	11	6.5	4	1.0565	5.18985	9.30472	9.92902	8.0224	4.48561	Chr4	+	22224813	22224902	aaataagctaACCTAGGATATGATGGGACATTACCtatctagattcgttgtactaggtAATGCCCTATCGTATCCTAGGTTGgtttattt	Y	1	osa-MIR1849,	osa-MIR1849	aaataagctaacctaggatatgatgggacattacctatctagattcgttgtactaggtaatgcccTATCGTATCCTAGGTTGGTTTattt	1	osa-MIR1849-p3	aatgcccTATCGTATCCTAGGTTG	(((((((((((((((((((((((((((.(((((((((....((....))....))))))))).)))))))))))))))))))))))))))	36.7	-51.1	1.5
160	227	5'	osa-MIR1851-p5_1ss1CT	TTCTTCTTCCTCCATCCTGCG	21	New	16	10	5.5	9	9.5	7	16.904	8.64975	5.1176	8.12374	11.725	7.84982	Chr5	+	26049315	26049760	cagagtgtcttcgccaaaatgccatcccgaacagaaatgccacttcCTCTTCTTCCTCCATCCTGCGcgtgaagagctcgcctgcggccatggctagctccctccctgccatcgccgccgcacgggcagcggagcccgcggcgcagtggcgactcttcggttgacggcggctggctacgcggtggcaacgaggaggcggcggcggccaggagctgctccaccggccccacgcgcacgcgcgccggcgggatccgcgcgtcgtcgccggagtccttccgcgacgacctcagctgcacaggcgttggcggggatggcagggagggcagcgccccgatcgccgtcggcaaggcggcatcggcgcggcggtggagatggccatggccgccggcgagctcttca…	Y	1	osa-MIR1851,	osa-MIR1851	cagagtgtcttcgccaaaatgccatcccgaacagaaatgccacttcctcttcttcctccatcctgcgcgtgaagagctcgcctgcggccatggctagctccctccctgccatcgccgccgcacgggcagcggagcccgcggcgcagtggcgactcttcggttgacggcggctggctacgcggtggcaacgaggaggcggcggcggccaggagctgctccaccggccccacgcgcacgcgcgccggcgggatccgcgcgtcgtcgccggagtccttccgcgacgacctcagctgcacaggcgttggcggggatggcagggagggcagcgccccgatcgccgtcggcaaggcggcatcggcgcggcggtggagatggccatggccgccggcgagctcttca…	0	osa-MIR1851-p5	ctcttcttcctccatcctgcg	....(((....)))...........(((..((.((((((((.((((.((((((((((((.((((((((((((((((((((((.(((((((((((((.((((((((((((((((.((((((.((((((.(((((.((((((((((.((((((.....(((((.((((((..((((((.(((.(((....)......)).)))..))))))..)))).)).))))).....))).)))..))))).))))).)))))..((((((((.((((...))))))))))))....))).......))))))))).))))))))))))))((.(((((((((.((((((.....)))))))))))...)))).)).)).))))))))))))).)))))))))))))…	70.9	-290.5	0.9
160	228	3'	osa-MIR1851-p3_1ss4AG	AAGGAGAAGAGCCAGGGGCATT	22	New	56	52	14	34	12	13	59.1641	44.9787	13.0266	30.6897	14.8106	14.5782	Chr5	+	26049315	26049760	cagagtgtcttcgccaaaatgccatcccgaacagaaatgccacttcCTCTTCTTCCTCCATCCTGCGcgtgaagagctcgcctgcggccatggctagctccctccctgccatcgccgccgcacgggcagcggagcccgcggcgcagtggcgactcttcggttgacggcggctggctacgcggtggcaacgaggaggcggcggcggccaggagctgctccaccggccccacgcgcacgcgcgccggcgggatccgcgcgtcgtcgccggagtccttccgcgacgacctcagctgcacaggcgttggcggggatggcagggagggcagcgccccgatcgccgtcggcaaggcggcatcggcgcggcggtggagatggccatggccgccggcgagctcttca…	Y	1	osa-MIR1851,	osa-MIR1851	cagagtgtcttcgccaaaatgccatcccgaacagaaatgccacttcctcttcttcctccatcctgcgcgtgaagagctcgcctgcggccatggctagctccctccctgccatcgccgccgcacgggcagcggagcccgcggcgcagtggcgactcttcggttgacggcggctggctacgcggtggcaacgaggaggcggcggcggccaggagctgctccaccggccccacgcgcacgcgcgccggcgggatccgcgcgtcgtcgccggagtccttccgcgacgacctcagctgcacaggcgttggcggggatggcagggagggcagcgccccgatcgccgtcggcaaggcggcatcggcgcggcggtggagatggccatggccgccggcgagctcttca…	0	osa-MIR1851-p3	aagaagaagagccaggggcatt	....(((....)))...........(((..((.((((((((.((((.((((((((((((.((((((((((((((((((((((.(((((((((((((.((((((((((((((((.((((((.((((((.(((((.((((((((((.((((((.....(((((.((((((..((((((.(((.(((....)......)).)))..))))))..)))).)).))))).....))).)))..))))).))))).)))))..((((((((.((((...))))))))))))....))).......))))))))).))))))))))))))((.(((((((((.((((((.....)))))))))))...)))).)).)).))))))))))))).)))))))))))))…	70.9	-290.5	0.9
161	229	5'	osa-miR1856	TATGCGTAAGACGGATTCGTA	21	Yes	1	1	0	0	0	0	1.0565	0.864975	0	0	0	0	Chr11	-	10376148	10376296	agagcactgcTATGCGTAAGACGGATTCGTActacctgcgtccgaccatatcatgtgcaccgatcaccgtctttagcttctctccaccaatgcaagcagcattcggatgcatgtcgtacgaatccgtcggacgcatagctattttcttt	Y	1	osa-MIR1856,	osa-MIR1856	agagcactgcTATGCGTAAGACGGATTCGTActacctgcgtccgaccatatcatgtgcaccgatcaccgtctttagcttctctccaccaatgcaagcagcattcggatgcatgtcgtacgaatccgtcggacgcatagctattttcttt	1	osa-miR1856	TATGCGTAAGACGGATTCGTA	((((....(((((((((..(((((((((((((.((.(((((((((.........((((...(((....)))....((((..............)))).))))))))))))).)).)))))))))))))..)))))))))....))))..	49.7	-63.6	0.9
162	230	5'	osa-MIR1857-p5	TTTTTGGAGCATGAGGTTATC	21	New	9	12	3	18	2	14	9.50851	10.3797	2.79142	16.2475	2.46843	15.6996	Chr11	+	2733902	2734031	gtttttatcctggttTTTTTGGAGCATGAGGTTATCtctcagtttttccgtgtccaaaataaaaggacaaaaactgttcttgaaaaccgagagataaccTCATGCTCCAAGAAAACCAGGataaaaaatt	Y	1	osa-MIR1857,	osa-MIR1857	gtttttatccTGGTTTTTTTGGAGCATGAGGttatctctcagtttttccgtgtccaaaataaaaggacaaaaactgttcttgaaaaccgagagataaccTCATGCTCCAAGAAAACCAGGataaaaaatt	1	osa-MIR1857-p5	TTTTTGGAGCATGAGGttatc	.(((((((((((((((((((((((((((((((((((((((.((((((...(((((.........)))))............)))))).)))))))))))))))))))))))))))))))))))))))...	35.4	-75.1	1.6
162	231	3'	osa-miR1857-3p	TCATGCTCCAAGAAAACCAGG	21	Yes	6	3	4	6	7	5	6.33901	2.59493	3.72189	5.41583	8.63951	5.60701	Chr11	+	2733902	2734031	gtttttatcctggttTTTTTGGAGCATGAGGTTATCtctcagtttttccgtgtccaaaataaaaggacaaaaactgttcttgaaaaccgagagataaccTCATGCTCCAAGAAAACCAGGataaaaaatt	Y	1	osa-MIR1857,	osa-MIR1857	gtttttatccTGGTTTTTTTGGAGCATGAGGttatctctcagtttttccgtgtccaaaataaaaggacaaaaactgttcttgaaaaccgagagataaccTCATGCTCCAAGAAAACCAGGataaaaaatt	1	osa-miR1857-3p	TCATGCTCCAAGAAAACCAGG	.(((((((((((((((((((((((((((((((((((((((.((((((...(((((.........)))))............)))))).)))))))))))))))))))))))))))))))))))))))...	35.4	-75.1	1.6
163	232	5'	osa-MIR1860-p5	TAAAGAGAAAACCAGCTTCC	20	New	5	5	17	2	14	38	5.28251	4.32488	15.818	1.80528	17.279	42.6133	Chr1	-	934420	934567	tcttgatttgatggtagggttagtgttatttgTAAAGAGAAAACCAGCTTCCagatctcgaatttgcctcaaacttatcttctcttgtagATCTGGAAGCTAGGTTTTCTCTttacaaataacactattttttcccccattaggtctg	Y	1	osa-MIR1860,	osa-MIR1860	tcttgatttgatggtagggttagtgttatttgtaaagAGAAAACCAGCTTCCAGATCTcgaatttgcctcaaacttatcttctcttgtagATCTGGAAGCTAGGTTTTCTCTttacaaataacactattttttcccccattaggtctg	1	osa-MIR1860-p5	taaagAGAAAACCAGCTTCC	....((..((((((..(((.(((((((((((((((((((((((((((((((((((((((((.......................))).))))))))))))).)))))))))))))))))))))))))......)))))))))..))..	36.5	-70.6	1.3
163	233	3'	osa-miR1860-3p	ATCTGGAAGCTAGGTTTTCTCT	22	Yes	1	7	10	11	6	30	1.0565	6.05483	9.30472	9.92902	7.40529	33.6421	Chr1	-	934420	934567	tcttgatttgatggtagggttagtgttatttgTAAAGAGAAAACCAGCTTCCagatctcgaatttgcctcaaacttatcttctcttgtagATCTGGAAGCTAGGTTTTCTCTttacaaataacactattttttcccccattaggtctg	Y	1	osa-MIR1860,	osa-MIR1860	tcttgatttgatggtagggttagtgttatttgtaaagAGAAAACCAGCTTCCAGATCTcgaatttgcctcaaacttatcttctcttgtagATCTGGAAGCTAGGTTTTCTCTttacaaataacactattttttcccccattaggtctg	1	osa-miR1860-3p	ATCTGGAAGCTAGGTTTTCTCT	....((..((((((..(((.(((((((((((((((((((((((((((((((((((((((((.......................))).))))))))))))).)))))))))))))))))))))))))......)))))))))..))..	36.5	-70.6	1.3
164	234	3'	osa-MIR1861c-p3_1ss9CT	AGACCGAGTCTGTGAATATGCAAA	24	New	0	0	0.5	0	4	1	0	0	0.465236	0	4.93686	1.1214	Chr2	+	20716174	20716280	cggtgttgcaTATTCTTAGACCCGATCTTGTagcaagaactgagtagttcgttaactcgctacgcggttcttgtcacaAGACCGAGCCTGTGAATATGCAAAggtgg	Y	1	osa-MIR1861c,	osa-MIR1861c	cggtgttgcatattcttagaccCGATCTTGTAGCAAGAACTGAGtagttcgttaactcgctacgcggttcttgtcacaagaccgagcctgtgaatatgcaaaggtgg	1	osa-MIR1861c-p3	agaccgagcctgtgaatatgcaaa	((...((((((((((..((...((.((((((..(((((((((.(((((..........))))).)))))))))..)))))).))...))..))))))))))...)).	47.7	-42.2	0.8
165	235	5'	osa-miR1861h	CGGTCTTGAGGCAGGAACTGAG	22	Yes	1	0.5	0.9	3.5	2	2.7	1.0565	0.432488	0.837425	3.15923	2.46843	3.02779	Chr6	-	27238190	27238293	ttcttaggccCGGTCTTGAGGCAGGAACTGAGtagttggtgaactcgctctatgttgttcgttcactcgcgacacGGTTCCTGTCCCAAGACTGAGtctgtgaa	Y	1	osa-MIR1861h,	osa-MIR1861h	ttcttaggccCGGTCTTGAGGCAGGAACTGAGtagttggtgaactcgctctatgttgttcgttcactcgcgacacggttcctgtcccaagactgagtctgtgaa	1	osa-miR1861h	CGGTCTTGAGGCAGGAACTGAG	....(((((.((((((((.(((((((((((.((.(..(((((((..((........))..)))))))..).)).))))))))))).)))))))).)))))....	51.9	-50.2	0.9
166	236	5'	osa-miR1861h	CGGTCTTGAGGCAGGAACTGAG	22	Yes	1	0.5	0.9	3.5	2	2.7	1.0565	0.432488	0.837425	3.15923	2.46843	3.02779	Chr8	-	15132727	15132836	atattcttaggccCGGTCTTGAGGCAGGAACTGAGtagttggtgaACTCGCTCTATGTTGTTCGTTCACTcgcgacacagttcctgtcccaaggctaagtctgtgaatat	Y	1	osa-MIR1861j,	osa-MIR1861j	atattcttaggccCGGTCTTGAGGCAGGAACTGAGtagttggtgaactcgctctatgttgttcgttcactcgcgacacagttcctgtcccaaggctaagtctgtgaatat	1	osa-miR1861h	CGGTCTTGAGGCAGGAACTGAG	((((((..((((..(((((((.(((((((((((.((.(..(((((((..((........))..)))))))..).)).))))))))))).)))))))..))))..))))))	48.2	-50.8	1
167	237	3'	osa-miR1862a_1ss2CT	ATGAGGTTGGTTTATTTTGGGACG	24	Diff	6	5	11	4	6	2	6.33901	4.32488	10.2352	3.61055	7.40529	2.24281	Chr5	+	1928587	1928850	tccctccatcccaaaataagccaacctcatactaggatgtccaaatttattgtattagaatatgtcatattttaatATGAGGTTGGTTTATTTTGGGATGatgagagt	N	3	osa-MIR1862b,osa-MIR1862c,osa-MIR1862a,	osa-MIR1862a	gtactccctccgtcccgaaataaccaaacctcgtaggacatgtcacatcctagtACGAGGTTGGTTTATTTTGGGACGgagggagtat	0	osa-miR1862a	ACGAGGTTGGTTTATTTTGGGACG	...(((((((((((((((((((((((((......((....)).........((((((((((((...))))))))))))))))))))))))))))))))))..)))...	33.3	-47.3	1.3
167	238	3'	osa-miR1862a_1ss6GA	ACGAGATTGGTTTATTTTGGGACG	24	Diff	0	3	1	0	2	4	0	2.59493	0.930472	0	2.46843	4.48561	Chr6	-	4920830	4921093	gtacttcatttgtctcaaaataaactaacctcgtatgatatgtagtatacatgagatttgtttattttgaaacccctccgtatatagcatacACGAGATTGGTTTATTTTGGAACGgatggaggac	N	4	osa-MIR1862b,osa-MIR1862c,osa-MIR1862a,osa-MIR1862e,	osa-MIR1862a	gtactccctccgtcccgaaataaccaaacctcgtaggacatgtcacatcctagtACGAGGTTGGTTTATTTTGGGACGgagggagtat	0	osa-miR1862a	ACGAGGTTGGTTTATTTTGGGACG	...((((((..((..(((((((((((((.(((((....((((..((((((..(((....((((......))))..))).))))))..)))).))))).)))))))))))))..))..))))))...	34.9	-43.8	1
168	239	3'	osa-miR1862a	ACGAGGTTGGTTTATTTTGGGACG	24	Yes	0	0	11	0	12	8	0	0	10.2352	0	14.8106	8.97122	Chr8	-	24022799	24023062	ctacgtcccaaaataaaccaacatcgtatgtgatgtaatacatcctaaaacaatgaatgatatatttgtattataggatgtgtcatatcccacACGAGGTTGATTTATTTTGGGACGggt	N	3	osa-MIR1862a,osa-MIR1862b,osa-MIR1862c,	osa-MIR1862c	actccctccgtcccaaaataagtcaatcccgtactagtatatgacacttcctagtACGAGGTTGGTTTATTTTGGGACGgagagagtag	0	osa-miR1862a	ACGAGGTTGGTTTATTTTGGGACG	...((((((((((((((.((((.((((.((.(((((.((((((((((..((((............))))....)))))))))).))))).)).)))).)))).))))))))))))))...	35	-50.4	1.2
169	240	5'	osa-MIR1862d-p5	TCCCAAAATAAACAAAGCTAGT	22	New	3	5	5.5	2.5	5.5	2	3.1695	4.32488	5.1176	2.2566	6.78819	2.24281	Chr3	+	33572145	33572406	gacctccctctgTCCCAAAATAAACAAACCTAGTacgggatgtgtcacaccctatactacgtttgtttattttggaacaggtggagtaa	N	1	osa-MIR1862d,	osa-MIR1862d	ctactggctagtctcgtagcttgctaggtactccctctgtcccaaaataaacaaagctagtacggggatgtggcacttcctagtcctgtACTAGGTTTGTTTATTTTGGGACGgagggagtatcatagtttgttactcctctggttacta	0	osa-MIR1862d-p5	tcccaaaataaacaaagctagt	...((((..((((.(((((((((((((((.(((((..((.((.....)).))..))))).))))))))))))))).))))..))))...	42.7	-42.3	1.1
169	241	3'	osa-miR1862d	ACTAGGTTTGTTTATTTTGGGACG	24	Yes	68	91	99	50	80	115	71.8421	78.7127	92.1167	45.1319	98.7372	128.961	Chr3	-	33572143	33572406	ttactccacctgttccaaaataaacaaacgtagtatagggtgtgacacatcccgtACTAGGTTTGTTTATTTTGGGACAgagggaggtc	N	2	osa-MIR1862d,osa-MIR1862e,	osa-MIR1862d	ctactggctagtctcgtagcttgctaggtactccctctgtcccaaaataaacaaagctagtacggggatgtggcacttcctagtcctgtACTAGGTTTGTTTATTTTGGGACGgagggagtatcatagtttgttactcctctggttacta	0	osa-miR1862d	ACTAGGTTTGTTTATTTTGGGACG	...((((..((((((((((((((((((((.(((((..(((((.....)))))..))))).))))))))))))))))))))..))))...	42.7	-53.2	1.4
170	242	5'	osa-MIR1863a-p5	GTCTAATATGGTATCCGAGCT	21	New	35	110	51	56	48	102	36.9775	95.1473	47.4541	50.5477	59.2423	114.383	Chr2	+	8521746	8522119	ccatatctctaGTCTAATATGGTATCCGAGCTtattggttagttgctcttgttccctcaatcccgtttgtctccatccacaaccacacgagtgcaaagcctcacattcatgtcaacaacaactctcatgtcattagcaaatctagtgtctagcatcaacacctaggtagcacttattggttaaaaagggcatttgctaggaaaaatgagcaaccactagtccactacacgtttggatgcttgacaatatgtgcgctttggtgcttgcaataataatgttgtgatggaaggtttgtcactaaatattggttagcaaagttgcagtatggggaagaccaataAGCTCTGATACCATGTTAGATTAGtgatatgcct	Y	1	osa-MIR1863a,	osa-MIR1863a	ccatatctctagtctaatatggtatccgagcttattggttagttgctcttgttccctcaatcccgtttgtctccatccacaaccacacgagtgcaaagcctcacattcatgtcaacaacaactctcatgtcattagcaaatctagtgtctagcatcaacacctaggtagcacttattggttaaaaagggcatttgctaggaaaaatgagcaaccactagtccactacacgtttggatgcttgacaatatgtgcgctttggtgcttgcaataataatgttgtgatggaaggtttgtcactaaatattggttagcaaagttgcagtatggggaagaccaataAGCTCTGATACCATGTTAGATTAGtgatatgcct	1	osa-MIR1863a-p5	gtctaatatggtatccgagct	.((((((.((((((((((((((((((.(((((((((((((....((....))........((((((((((.((((((.(((((....((((..((((((..(((((...((((((........(((((..((((((.....)))))).((((((......(((...((((........))))...))).....)))))).....))))).........(((((.........)))))..))))))..))))).))))).)..))))..........)))))))))))...(((((.(((((...)))))..)))))...)))).))))))..))))))))))))).)))))))))))))))))).))))))...	40.9	-124.9	0.8
170	243	3'	osa-miR1863a	AGCTCTGATACCATGTTAGATTAG	24	Yes	2	9.5	4	9.83333	5	5	2.113	8.21726	3.72189	8.87594	6.17108	5.60701	Chr2	+	8521746	8522119	ccatatctctaGTCTAATATGGTATCCGAGCTtattggttagttgctcttgttccctcaatcccgtttgtctccatccacaaccacacgagtgcaaagcctcacattcatgtcaacaacaactctcatgtcattagcaaatctagtgtctagcatcaacacctaggtagcacttattggttaaaaagggcatttgctaggaaaaatgagcaaccactagtccactacacgtttggatgcttgacaatatgtgcgctttggtgcttgcaataataatgttgtgatggaaggtttgtcactaaatattggttagcaaagttgcagtatggggaagaccaataAGCTCTGATACCATGTTAGATTAGtgatatgcct	Y	1	osa-MIR1863a,	osa-MIR1863a	ccatatctctagtctaatatggtatccgagcttattggttagttgctcttgttccctcaatcccgtttgtctccatccacaaccacacgagtgcaaagcctcacattcatgtcaacaacaactctcatgtcattagcaaatctagtgtctagcatcaacacctaggtagcacttattggttaaaaagggcatttgctaggaaaaatgagcaaccactagtccactacacgtttggatgcttgacaatatgtgcgctttggtgcttgcaataataatgttgtgatggaaggtttgtcactaaatattggttagcaaagttgcagtatggggaagaccaataAGCTCTGATACCATGTTAGATTAGtgatatgcct	1	osa-miR1863a	AGCTCTGATACCATGTTAGATTAG	.((((((.((((((((((((((((((.(((((((((((((....((....))........((((((((((.((((((.(((((....((((..((((((..(((((...((((((........(((((..((((((.....)))))).((((((......(((...((((........))))...))).....)))))).....))))).........(((((.........)))))..))))))..))))).))))).)..))))..........)))))))))))...(((((.(((((...)))))..)))))...)))).))))))..))))))))))))).)))))))))))))))))).))))))...	40.9	-124.9	0.8
171	244	3'	osa-miR1863b.2_L+1	TAGAGACTTGGCTGATGCATTACT	24	Diff	2	4	0	0.333333	0	1	2.113	3.4599	0	0.300879	0	1.1214	Chr12	+	4867257	4867616	caatagcaatgcatcagttacgtttcctacaTAGTTACATGGTATCAGAGCTGAaatcctaaaccaatgaatgtttatccagcaccaatcccctgctgctaggagctgtagctctcggggcagtacctaatccgctgctgatctgtttctagtcatgaaaagcactgtgatctgtaagtgcttgctgcatgccatggttttgcccaattctatggccatcgttggattcgtgacctgacagtgatgcaataatcagtgatggatttgtgttggctctacttggggttgaggatcttagctgttagctctgataccatgttaactgttTAGAGACTTGGCTGATGCATTACTtttggaaac	Y	1	osa-MIR1863b,	osa-MIR1863b	caatagcaatgcatcagttacgtttcctacatagttacatggtatcagagctgaaatcctaaaccaatgaatgtttatccagcaccaatcccctgctgctaggagctgtagctctcggggcagtacctaatccgctgctgatctgtttctagtcatgaaaagcactgtgatctgtaagtgcttgctgcatgccatggttttgcccaattctatggccatcgttggattcgtgacctgacagtgatgcaataatcagtgatggatttgtgttggctctacttggggttgaggatcttagctgttAGCTCTGATACCATGTTAACTGTTtAGAGACTTGGCTGATGCATTACTtttggaaac	1	osa-miR1863b.2	AGAGACTTGGCTGATGCATTACT	(((.((.((((((((((..(.((((.(((.((((((((((((((((((((((((.(((((.((((.......((....(((((((........(((((((.(((((....)))).)..)))))))...((((((..(((((((((((....(((((((((((((((..........))))))).......(((((((..((....))..)))))))..........))))))))..)))))..........))))))..)))))).)))))))....))....)))).)))))........)))))))))))))))))).)))))).))))))).)..)))))))))).)).))).....	44.2	-139.3	0.9
172	245	3'	osa-miR1863c	TAGAAACTTGGCTGATGCATTACT	24	Yes	42	81.5	33	38.8333	22	43	44.3731	70.4955	30.7056	35.0524	27.1527	48.2203	Chr12	+	4869207	4869497	agcaatgcatcagttatgtttccTGGATCATTAAATCAttgaatgtttatctagcaccaatctgctgctgatctgtttgtagtcatgaaaagcactttatgatctgaaagtgctggctgtatgccatggttttccccattctatggttattattgcaatcgtgacttaatagtgatgcaataatcagtagtggattcgtgttggctctacttcgggtttaggatcatagttattagctctgataccatgttattgattTAGAAACTTGGCTGATGCATTACTtttggagac	Y	1	osa-MIR1863c,	osa-MIR1863c	agcaatgcatcagttatgtttcctggatcattaaatcattgaatgtttatctagcaccaatctgctgctgatctgtttgtagtcatgaaaagcactttatgatctgaaagtgctggctgtatgccatggttttccccattctatggttattattgcaatcgtgacttaatagtgatgcaataatcagtagtggattcgtgttggctctacttcgggtttaggatcatagttattagctctgataccatgttattgattTAGAAACTTGGCTGATGCATTACTtttggagac	1	osa-miR1863c	TAGAAACTTGGCTGATGCATTACT	((.((((((((((..(.(((((.(..((((.((((((..((((.((....(((((((.((((..((((((((....((((((((((((..((((((((........)))))))).((.....(((((((...........))))))).......))..))))))))..........))))..))))))))..)))).)))))))....))))))))))))((((((.(((.....))).)))).)).......))))..)))))).)..)))))))))).)).........	37.5	-94.7	0.9
173	246	3'	osa-MIR1864-p3_L-5R+5	GTAACGTGATGGTCAATGTGTAGT	24	Diff	4	5	6	5	4	10	4.22601	4.32488	5.58283	4.51319	4.93686	11.214	Chr2	-	14949073	14949328	actacacattgaccatcgcgttactacgccattcttgagagacgagaattgaaaagaggtgggcgtggggggaggtagcaggcGGGTTTGACCGGTGGGAGGGGGCtttgaccgttctttgaccgaagtgggaggtgggttttgggccctagggagggggaggtgggttggcccatgagagacctccccccacacccacccctttttggtttgtgtcgcaggaacattgtaGTAACGTGATGGTCAATGTGTAGTa	Y	1	osa-MIR1864,	osa-MIR1864	actacacattgaccatcgcgttactacgccattcttgagagacgagaattgaaaagaggtgggcgtggggggaggtagcaggcgggtttgaccggtgggagggggctttgaccgttctttgaccgaagtgggaggtgggttttgggccctagggagggggaggtgggttggcccatgagagacctccccccacacccacccctttttggtttgtgtcgcaggaacaTTGTAGTAACGTGATGGTCAATGTgtagta	1	osa-MIR1864-p3	GTAACGTGATGGTCAATGTgtagt	((((((((((((((((((((((((((((...((((((.((.((((..((..(((((.((((((.((((((((((((......(((......)))......((((.((..((((..((((..((....))..))))..))))..)).))))............(((((....))))).....)))))))))))).)))))).)))))..)))))).)).))))))...)))))))))))))))))))))))))))).	55.9	-141.1	1
174	247	3'	osa-miR1865-3p_R-1	CGAAGAATCGCAGTCACTAGTTG	23	Diff	0	3	3	1	1	4	0	2.59493	2.79142	0.902638	1.23422	4.48561					ctcgaactacTGCTAGTGATGGTGATTCTTCGACacagtattcggcgagttttgggcttcatcatgcggtgctcgacatggtgacgaagcctgaacttgccaaagactgtCGAAGAATCGCAGTCACTAGTTGTaatttgactc	Y	1	osa-MIR1865,	osa-MIR1865	ctcgaactacTGCTAGTGATGGTGATTCTTCGACacagtattcggcgagttttgggcttcatcatgcggtgctcgacatggtgacgaagcctgaacttgccaaagactgtCGAAGAATCGCAGTCACTAGTTGTaatttgactc	1	osa-miR1865-3p	CGAAGAATCGCAGTCACTAGTTGT	.(((((.(((..(((((((..((((((((((((((..((.((.(((((((.(..((((((((((((((.....)).))))))))...))))..)))))))).)).))))))))))))))))..)))))))..))).)))))...	47.9	-72.2	1
175	248	5'	osa-MIR1870-p5_L-6R+6	ATTAGACCTAGTGGGCATTTATAC	24	Diff	15	43	16	20	17	31	15.8475	37.1939	14.8876	18.0528	20.9817	34.7635	Chr6	+	21164755	21164963	tagtgtcaaagtaatggaggatttgggaaataaactgcgttcatgctgaATTAGACCTAGTGGGCATTTATACatcacaacacatggtactgttgccctttcctttttctagccttagtgTTGTGATCTATATATGCCCTTTagggctaattcagcatgaacatagtttattctccattcctcaaatcatccattacttttgacactta	Y	1	osa-MIR1870,	osa-MIR1870	tagtgtcaaagtaatggaggatttgggaaataaactgcgttcaTGCTGAATTAGACCTAGTGGGCATttatacatcacaacacatggtactgttgccctttcctttttctagccttagtgttgtgatctatatatgcccTTTAGGGCTAATTCAGCATGAACAtagtttattctccattcctcaaatcatccattacttttgacactta	1	osa-MIR1870-p5	ATTAGACCTAGTGGGCATttatac	.(((((((((((((((((.(((((((((((((((((..((((((((((((((((.((((..((((((.((((.((((((((((..((((....)))).....((......)).....)))))))))).)))).))))))..)))).))))))))))))))))..))))))))......))).)))))).))))))))))).))))))..	37.3	-101.5	1.3
175	249	3'	osa-MIR1870-p3	TTGTGATCTATATATGCCCTTT	22	New	3	5	8	4	5	2	3.1695	4.32488	7.44378	3.61055	6.17108	2.24281	Chr6	+	21164755	21164963	tagtgtcaaagtaatggaggatttgggaaataaactgcgttcatgctgaATTAGACCTAGTGGGCATTTATACatcacaacacatggtactgttgccctttcctttttctagccttagtgTTGTGATCTATATATGCCCTTTagggctaattcagcatgaacatagtttattctccattcctcaaatcatccattacttttgacactta	Y	1	osa-MIR1870,	osa-MIR1870	tagtgtcaaagtaatggaggatttgggaaataaactgcgttcaTGCTGAATTAGACCTAGTGGGCATttatacatcacaacacatggtactgttgccctttcctttttctagccttagtgttgtgatctatatatgcccTTTAGGGCTAATTCAGCATGAACAtagtttattctccattcctcaaatcatccattacttttgacactta	1	osa-MIR1870-p3	ttgtgatctatatatgcccTTT	.(((((((((((((((((.(((((((((((((((((..((((((((((((((((.((((..((((((.((((.((((((((((..((((....)))).....((......)).....)))))))))).)))).))))))..)))).))))))))))))))))..))))))))......))).)))))).))))))))))).))))))..	37.3	-101.5	1.3
176	250	5'	osa-MIR1871-p5	AAATCTAACATGGTATCGGATCCA	24	New	3	4	3	8	0	9	3.1695	3.4599	2.79142	7.2211	0	10.0926	Chr6	+	13330464	13330598	taacaatgaatatatctgttgtttctctcAAATCTAACATGGTATCGGATCCAtaggtgtagccatatcaatcttaaagctATGGCTCTGATATCATGTTGGTTTtgaaggaaatgactgatatatttcattgta	Y	1	osa-MIR1871,	osa-MIR1871	taacaatgaatatatctgttgtttctctcaaatctaacatggtatcggatccataggtgtagccatatcaatcttaaagctATGGCTCTGATATCATGTTGGTTTtgaaggaaatgactgatatatttcattgta	1	osa-MIR1871-p5	aaatctaacatggtatcggatcca	..((((((((((((((.((..((((..(((((.((((((((((((((((.((((((.......................)))))).)))))))))))))))).)))))..))))..)).)))))))).)))))).	32.6	-59.2	1.3
176	251	3'	osa-miR1871	ATGGCTCTGATATCATGTTGGTTT	24	Yes	16	30	33	21	34	30	16.904	25.9493	30.7056	18.9554	41.9633	33.6421	Chr6	+	13330464	13330598	taacaatgaatatatctgttgtttctctcAAATCTAACATGGTATCGGATCCAtaggtgtagccatatcaatcttaaagctATGGCTCTGATATCATGTTGGTTTtgaaggaaatgactgatatatttcattgta	Y	1	osa-MIR1871,	osa-MIR1871	taacaatgaatatatctgttgtttctctcaaatctaacatggtatcggatccataggtgtagccatatcaatcttaaagctATGGCTCTGATATCATGTTGGTTTtgaaggaaatgactgatatatttcattgta	1	osa-miR1871	ATGGCTCTGATATCATGTTGGTTT	..((((((((((((((.((..((((..(((((.((((((((((((((((.((((((.......................)))))).)))))))))))))))).)))))..))))..)).)))))))).)))))).	32.6	-59.2	1.3
177	252	5'	osa-MIR1873-p5_1ss20GA_L+3R-3	ACCTCAACATGGTATCAGAACTGG	24	Diff	9	43	49	32	43	65	9.50851	37.1939	45.5931	28.8844	53.0713	72.8912	Chr7	+	12755913	12756109	tagattatgaACCTCAACATGGTATCAGAGCTGGaagtcctaaagttgacatcatgatagcctgacgatggtggagaccatgataagctgataccatgtattttgccgacattgtgtttctccaagattgtgctacatcacaaacttagaaaaacttagaactTCTAGCTCTGATACCATGTTGAGTtttatggcct	Y	1	osa-MIR1873,	osa-MIR1873	tagattatgaaccTCAACATGGTATCAGAGCTGGAAGtcctaaagttgacatcatgatagcctgacgatggtggagaccatgataagctgataccatgtattttgccgacattgtgtttctccaagattgtgctacatcacaaacttagaaaaacttagaacttctagctctgataccatgttgagttttatggcct	1	osa-MIR1873-p5	accTCAACATGGTATCAGAGCTGG	.((..((((((.((((((((((((((((((((((((((.((((((((......(((.((((...(((((..((((((.((..((..((.(((((...)))))..))....))..))..))))))..))))))))))))....)))).........)))).)))))))))))))))))))))))))).))))))..))	39.6	-77.3	1
177	253	3'	osa-MIR1873-p3	TCTAGCTCTGATACCATGTTGAGT	24	New	12	20	25	13	10	17	12.678	17.2995	23.2618	11.7343	12.3422	19.0638	Chr7	+	12755913	12756109	tagattatgaACCTCAACATGGTATCAGAGCTGGaagtcctaaagttgacatcatgatagcctgacgatggtggagaccatgataagctgataccatgtattttgccgacattgtgtttctccaagattgtgctacatcacaaacttagaaaaacttagaactTCTAGCTCTGATACCATGTTGAGTtttatggcct	Y	1	osa-MIR1873,	osa-MIR1873	tagattatgaaccTCAACATGGTATCAGAGCTGGAAGtcctaaagttgacatcatgatagcctgacgatggtggagaccatgataagctgataccatgtattttgccgacattgtgtttctccaagattgtgctacatcacaaacttagaaaaacttagaacttctagctctgataccatgttgagttttatggcct	1	osa-MIR1873-p3	tctagctctgataccatgttgagt	.((..((((((.((((((((((((((((((((((((((.((((((((......(((.((((...(((((..((((((.((..((..((.(((((...)))))..))....))..))..))))))..))))))))))))....)))).........)))).)))))))))))))))))))))))))).))))))..))	39.6	-77.3	1
178	254	5'	osa-miR1874-5p	TAGGGCTACTACACCATCCATAAG	24	Yes	26	67	4	96	4	3	27.469	57.9533	3.72189	86.6533	4.93686	3.36421	Chr8	-	8702798	8702948	ccataatcatctattagtacagtggtgaagacaTAGGGCTACTACACCATCCATAAGggttcgaatcttcgatgtgcctagatagggtacagttggatcccaTATGGATGGAGGTGTAACCCGATGccttttacaaatagatggttatttt	Y	1	osa-MIR1874,	osa-MIR1874	ccataatcatctattagtacagtggtgaagacaTAGGGCTACTACACCATCCATAAGggttcgaatcttcgatgtgcctagatagggtacagttggatcccaTATGGATGGAGGTGTAACCCGATGccttttacaaatagatggttatttt	1	osa-miR1874-5p	TAGGGCTACTACACCATCCATAAG	..(((((((((((((.(((.......((((.(((.(((.(((.((.(((((((((.(((.((.(((......(((((((.....)))))))))).)).))).)))))))))..))))).))).))).))))))).)))))))))))))...	41.7	-58.1	0.9
178	255	3'	osa-miR1874-3p	TATGGATGGAGGTGTAACCCGATG	24	Yes	35	70	5	103	2	4	36.9775	60.5483	4.65236	92.9717	2.46843	4.48561	Chr8	-	8702798	8702948	ccataatcatctattagtacagtggtgaagacaTAGGGCTACTACACCATCCATAAGggttcgaatcttcgatgtgcctagatagggtacagttggatcccaTATGGATGGAGGTGTAACCCGATGccttttacaaatagatggttatttt	Y	1	osa-MIR1874,	osa-MIR1874	ccataatcatctattagtacagtggtgaagacaTAGGGCTACTACACCATCCATAAGggttcgaatcttcgatgtgcctagatagggtacagttggatcccaTATGGATGGAGGTGTAACCCGATGccttttacaaatagatggttatttt	1	osa-miR1874-3p	TATGGATGGAGGTGTAACCCGATG	..(((((((((((((.(((.......((((.(((.(((.(((.((.(((((((((.(((.((.(((......(((((((.....)))))))))).)).))).)))))))))..))))).))).))).))))))).)))))))))))))...	41.7	-58.1	0.9
179	256	5'	osa-MIR1875-p5	TCATTGCACTTTGCTCCATTGTGG	24	New	4	2	1	7	0	1	4.22601	1.72995	0.930472	6.31847	0	1.1214	Chr9	-	17567947	17568198	gctgtccatttTCATTGCACTTTGCTCCATTGTGGtattgacattctgcaagaacgagtcccagtatcaagtcactgttacggtgttgttggtaccattgattaacataacacttgacggccatacttggtcatgttgtatgttatcagcttcacagaggtacatgtggcactttaacagttatttgatacagtgactaggctgcagttgagcgaaaccACAATGGAGTGAAGTGCAACAgaaatgaacatt	Y	1	osa-MIR1875,	osa-MIR1875	gctgtccattttcattgcactttgctccattgtggtattgacattctgcaagaacgagtcccagtatcaagtcactgttacggtgttgttggtaccattgattaacataacacttgacggccatacttggtcatgttgtatgttatcagcttcacagaggtacatgtggcactttaacagttatttgatacagtgactaggctgcagttgagcgaaaccACAATGGAGTGAAGTGCAACAGAAatgaacatt	1	osa-MIR1875-p5	tcattgcactttgctccattgtgg	..(((.((((((..((((((((..((((((((((((.(((.....(((((.(....((((...(((((((((.(((((((..((((..(..(((((..(((.....((((((...((((((((....)))))..)))...)))))).....)))....)))))..)..))))..))))))).)))))))))...))))...)))))).....))).))))))))))))..))))))))..)))))).)))..	41.7	-105.7	1
179	257	3'	osa-miR1875_R-3	ACAATGGAGTGAAGTGCAACA	21	Diff	5	14	3	15	13	17	5.28251	12.1097	2.79142	13.5396	16.0448	19.0638	Chr9	-	17567947	17568198	gctgtccatttTCATTGCACTTTGCTCCATTGTGGtattgacattctgcaagaacgagtcccagtatcaagtcactgttacggtgttgttggtaccattgattaacataacacttgacggccatacttggtcatgttgtatgttatcagcttcacagaggtacatgtggcactttaacagttatttgatacagtgactaggctgcagttgagcgaaaccACAATGGAGTGAAGTGCAACAgaaatgaacatt	Y	1	osa-MIR1875,	osa-MIR1875	gctgtccattttcattgcactttgctccattgtggtattgacattctgcaagaacgagtcccagtatcaagtcactgttacggtgttgttggtaccattgattaacataacacttgacggccatacttggtcatgttgtatgttatcagcttcacagaggtacatgtggcactttaacagttatttgatacagtgactaggctgcagttgagcgaaaccACAATGGAGTGAAGTGCAACAGAAatgaacatt	1	osa-miR1875	ACAATGGAGTGAAGTGCAACAGAA	..(((.((((((..((((((((..((((((((((((.(((.....(((((.(....((((...(((((((((.(((((((..((((..(..(((((..(((.....((((((...((((((((....)))))..)))...)))))).....)))....)))))..)..))))..))))))).)))))))))...))))...)))))).....))).))))))))))))..))))))))..)))))).)))..	41.7	-105.7	1
180	258	5'	osa-MIR1876-p5	GCTGGCTTTTGAACCCATTTATGG	24	New	4	0	0	4	5	3	4.22601	0	0	3.61055	6.17108	3.36421	Chr10	+	4833365	4833521	ggcacatatgttggtattctattggaatgcaagtggGCTGGCTTTTGAACCCATTTATGGgctattcaagtgggtaaaccataggttggtgcacttaaatggcctATAAGTGGGTTTGTGGGCTGGCCCtcttgtatcctgatagtttagtatgatt	Y	1	osa-MIR1876,	osa-MIR1876	ggcacatatgttggtattctattggaatgcaagtgggctggcttttgaacccatttatgggctattcaagtgggtaaaccataggttggtgcacttaaatggcctATAAGTGGGTTTGTGGGCTGGCCCtcttgtatcctgatagtttagtatgatt	1	osa-MIR1876-p5	gctggcttttgaacccatttatgg	....(((((.....((..((((..(.(((((((.((((..(((...((((((((((((((((((((.(((((....((((...))))....))))).))))))))))))))))))))...)))..)))).))))))).)..))))..)))))))...	43.3	-74.2	1.1
180	259	3'	osa-miR1876	ATAAGTGGGTTTGTGGGCTGGCCC	24	Yes	381	462	347	200	778	506	402.527	399.619	322.874	180.528	960.22	567.43	Chr10	+	4833365	4833521	ggcacatatgttggtattctattggaatgcaagtggGCTGGCTTTTGAACCCATTTATGGgctattcaagtgggtaaaccataggttggtgcacttaaatggcctATAAGTGGGTTTGTGGGCTGGCCCtcttgtatcctgatagtttagtatgatt	Y	1	osa-MIR1876,	osa-MIR1876	ggcacatatgttggtattctattggaatgcaagtgggctggcttttgaacccatttatgggctattcaagtgggtaaaccataggttggtgcacttaaatggcctATAAGTGGGTTTGTGGGCTGGCCCtcttgtatcctgatagtttagtatgatt	1	osa-miR1876	ATAAGTGGGTTTGTGGGCTGGCCC	....(((((.....((..((((..(.(((((((.((((..(((...((((((((((((((((((((.(((((....((((...))))....))))).))))))))))))))))))))...)))..)))).))))))).)..))))..)))))))...	43.3	-74.2	1.1
181	260	5'	osa-miR1878	ACTTAATCTGGACACTATAAAAGA	24	Yes	0	3	2	0	0	3	0	2.59493	1.86094	0	0	3.36421	Chr9	+	16555509	16555608	accactgcagACTTAATCTGGACACTATAAAAGAaaattgtgcatgtgaaaatatgcccattataaATTTGTAGTGTTCAGATTGAGTTTagaatggttg	Y	1	osa-MIR1878,	osa-MIR1878	accactgcagACTTAATCTGGACACTATAAAAGAaaattgtgcatgtgaaaatatgcccattataaatttgtagtgttcagattgagtttagaatggttg	1	osa-miR1878	ACTTAATCTGGACACTATAAAAGA	((((....(((((((((((((((((((((((.......((.((((((....)))))).)).......)))))))))))))))))))))))....))))..	33	-41.8	1.3
182	261	5'	osa-miR1880	TTCCAAGCGGGCCACTTAAGCATT	24	Yes	3	0	0	0	0	0	3.1695	0	0	0	0	0	Chr11	+	13959877	13960005	gttccgcttgtgaaaatcgatttTTCCAAGCGGGCCACTTAAGCATTccgcctgtaaaattaaaggtattttcgcagccggatcgcttaagtggtccgcctggatAAATCGATTTTCGTAGGCGGATGA	Y	1	osa-MIR1880,	osa-MIR1880	gttccgcttgtgaaaatcgatttTTCCAAGCGGGCCACTTAAGCATTccgcctgtaaaattaaaggtattttcgcagccggatcgcttaagtggtccgcctggataaatcgattttcgtaggcggatga	1	osa-miR1880	TTCCAAGCGGGCCACTTAAGCATT	..(((((((..((((((((((((.((((.(((((((((((((((..((((.(((((((((.......))))).)))).))))..))))))))))))))).)))).))))))))))))..)))))))...	46.5	-77.1	1.3
183	262	5'	osa-MIR1883a-p5_L-3R+3	TGTGACGGGCCGAGAATGGAACCC	24	Diff	14	16	15.5	11	22.5	16.5	14.791	13.8396	14.4223	9.92902	27.7698	18.5031	Chr11	+	13523520	13523637	acccgtcactggtatctagtcaccTGTGACGGGCCGAGAATGGAACCCgtcaaagggacacctctgacgggttccattctcgATCCGTCACAGGTGACTAGATGCCtgtgacggcccg	Y	1	osa-MIR1883a,	osa-MIR1883a	acccgtcactggtatctagtcACCTGTGACGGGCCGAGAATGGAAcccgtcaaagggacacctctgacgggttccattctcgatccgtcacaggtgactagatgcctgtgacggcccg	1	osa-MIR1883a-p5	TGTGACGGGCCGAGAATGGAAccc	..(((((((.((((((((((((((((((((((..((((((((((((((((((.(((....))).))))))))))))))))))..)))))))))))))))))))))).)))))))....	58.5	-101.7	1.5
183	263	3'	osa-MIR1883a-p3	ATCCGTCACAGGTGACTAGATGCC	24	New	13	15	9	11	10	16	13.7345	12.9746	8.37425	9.92902	12.3422	17.9424	Chr11	+	13523520	13523637	acccgtcactggtatctagtcaccTGTGACGGGCCGAGAATGGAACCCgtcaaagggacacctctgacgggttccattctcgATCCGTCACAGGTGACTAGATGCCtgtgacggcccg	Y	1	osa-MIR1883a,	osa-MIR1883a	acccgtcactggtatctagtcACCTGTGACGGGCCGAGAATGGAAcccgtcaaagggacacctctgacgggttccattctcgatccgtcacaggtgactagatgcctgtgacggcccg	1	osa-MIR1883a-p3	atccgtcacaggtgactagatgcc	..(((((((.((((((((((((((((((((((..((((((((((((((((((.(((....))).))))))))))))))))))..)))))))))))))))))))))).)))))))....	58.5	-101.7	1.5
184	264	5'	osa-MIR1883b-p5_1ss6TA_L+12R-15	AGGTAACTAGTCACCTGTGAC	21	Diff	12	187	3.5	248	87.5	265.5	12.678	161.75	3.25665	223.854	107.994	297.732	Chr11	-	9367993	9368128	cggttgcagcccgtcacAGGTATCTAGTCACCTGTGACgggccgagaatggaatccgtcaaaggaacacacctttgtcagattctacttcctgcccatcacAGGTGACTAGATACCTGTGACGGGccgcaacttac	Y	1	osa-MIR1883b,	osa-MIR1883b	cggttgcagcccgtcacaggtatctagtcACCTGTGACGGGCCGAGAATGGAAtccgtcaaaggaacacacctttgtcagattctacttcctgcccatcacaggtgactagatacctgtgacgggccgcaacttac	1	osa-MIR1883b-p5	aggtatctagtcACCTGTGAC	.((((((.(((((((((((((((((((((((((((((.((((...((((((((((...((((((......))))))...))))))).)))..)))).))))))))))))))))))))))))))))).))))))...	53.7	-95.6	1.3
184	265	3'	osa-MIR1883b-p3_1ss11AT	AGGTGACTAGTTACCTGTGACGGG	24	New	1	2	3	3	3	4	1.0565	1.72995	2.79142	2.70791	3.70265	4.48561	Chr11	-	9367993	9368128	cggttgcagcccgtcacAGGTATCTAGTCACCTGTGACgggccgagaatggaatccgtcaaaggaacacacctttgtcagattctacttcctgcccatcacAGGTGACTAGATACCTGTGACGGGccgcaacttac	Y	1	osa-MIR1883b,	osa-MIR1883b	cggttgcagcccgtcacaggtatctagtcACCTGTGACGGGCCGAGAATGGAAtccgtcaaaggaacacacctttgtcagattctacttcctgcccatcacaggtgactagatacctgtgacgggccgcaacttac	1	osa-MIR1883b-p3	aggtgactagatacctgtgacggg	.((((((.(((((((((((((((((((((((((((((.((((...((((((((((...((((((......))))))...))))))).)))..)))).))))))))))))))))))))))))))))).))))))...	53.7	-95.6	1.3
185	266	3'	osa-miR2055	TTTCCTTGGGAAGGTGGTTTC	21	Yes	33	21	39	16	17	44	34.8645	18.1645	36.2884	14.4422	20.9817	49.3417	Chr9	-	431432	431531	agaagatggaggcaccagcccaaggaaacacagacattgACACGCAATTCAAGGAGAagattgcgtcctacttTTTCCTTGGGAAGGTGGTTTCtcttct	Y	1	osa-MIR2055,	osa-MIR2055	agaagatggaggcaccagcccaaggaaacacagacattgacacgcaattcaaggagaagattgcgtcctacttTTTCCTTGGGAAGGTGGTTTCtcttct	1	osa-miR2055	TTTCCTTGGGAAGGTGGTTTC	((((((.(((..((((..((((((((((..(((...)))..((((((((.........)))))))).......))))))))))..))))..)))))))))	47	-36.1	0.8
186	267	5'	osa-MIR2096-p5_L-3R+4	CGATTTCCCCCTCGGGCGAGCC	22	Diff	8	9	4	4	4	3	8.45201	7.78478	3.72189	3.61055	4.93686	3.36421	Chr1	+	6443388	6443624	gacgccgcactgcCGATTTCCCCCTCGGGCGAGCCatcggagcgggggccgttggctcccaaagcagacgcgagaattcactgaaattaccgcgccatcttatctccgcaagttgaagaatataattcgggcgcagtaatttttagtgaattcatgtgtctactactacatatgtctgcttgggagccaaccgcgtttcgatggCTCGCCTGAGGGGAAATCGGCgggaggcgtttg	Y	1	osa-MIR2096,	osa-MIR2096	gacgccgcacTGCCGATTTCCCCCTCGGGCGagccatcggagcgggggccgttggctcccaaagcagacgcgagaattcactgaaattaccgcgccatcttatctccgcaagttgaagaatataattcgggcgcagtaatttttagtgaattcatgtgtctactactacatatgtctgcttgggagccaaccgcgtttcgatggctcgCCTGAGGGGAAATCGGCGGGAggcgtttg	1	osa-MIR2096-p5	CGATTTCCCCCTCGGGCGagcc	((((((...((((((((((.((((((((((((((((((((((((.((....(((((((((((.((((((....(((((((((((((((((.(((((..(((........)))..(((........))).))))).)))).))))))))))))).(((((........))))).))))))))))))))))))).))))))))))))))))))))))))))))))))))..))))))..	54.9	-146.3	1.1
187	268	5'	osa-miR2103_L+2R-2	TTTTTCCCTCTCCGTGCGCGCT	22	Diff	3	0	9	1	15	22	3.1695	0	8.37425	0.902638	18.5132	24.6709	Chr12	-	16852565	16852637	cggcgccTTTTTCCCTCTCCGTGCGCGCTcgccggccggCGAGGATGGATGCCGGGAGGGAgagacaagaggc	Y	1	osa-MIR2103,	osa-MIR2103	cggcgccttTTTCCCTCTCCGTGCGCGCTCGccggccggcgaggatggatgccgggagggagagacaagaggc	1	osa-miR2103	TTTCCCTCTCCGTGCGCGCTCG	....((((((((((((((((((.((..((((((....))))))..)).)))..)))))))))).....)))))	71.2	-35.3	0.7
187	269	3'	osa-MIR2103-p3	CGAGGATGGATGCCGGGAGGGA	22	New	1	10	15	5	13	20	1.0565	8.64975	13.9571	4.51319	16.0448	22.4281	Chr12	-	16852565	16852637	cggcgccTTTTTCCCTCTCCGTGCGCGCTcgccggccggCGAGGATGGATGCCGGGAGGGAgagacaagaggc	Y	1	osa-MIR2103,	osa-MIR2103	cggcgccttTTTCCCTCTCCGTGCGCGCTCGccggccggcgaggatggatgccgggagggagagacaagaggc	1	osa-MIR2103-p3	cgaggatggatgccgggaggga	....((((((((((((((((((.((..((((((....))))))..)).)))..)))))))))).....)))))	71.2	-35.3	0.7
188	270	3'	osa-miR2106_L+1R+1_1ss3CG	GCGGAGGTTTTCTGGATACATTC	23	Diff	12	25	5	8	22	6	12.678	21.6244	4.65236	7.2211	27.1527	6.72842	Chr2	-	23768609	23768694	tgcgagaaggatgttcCGAGAATCTCGTACGCCGGTGAGGTTtcccgtgatctgGCCGAGGTTTTCTGGATACATTCaacgcggaa	Y	1	osa-MIR2106,	osa-MIR2106	tgcgagaaggatgttccgagaatctcgtacgccggtgaggtttcccgtgatctggCCGAGGTTTTCTGGATACATTcaacgcggaa	1	osa-miR2106	CCGAGGTTTTCTGGATACATT	((((....(((((((((((((((((((...(((((...((....)).....))))))))))))))).))).))))))..))))...	53.5	-33.3	0.7
189	271	3'	osa-miR2118b	TTCCCGATGCCTCCCATTCCTA	22	Yes	1	0	0.25	0	0.5	0.5	1.0565	0	0.232618	0	0.617108	0.560701	Chr4	-	21645285	21645463	atgagcgAGGAAGAGGAAGAAAgaggtagtctaagagcagtgggaatgggaacatagaggaaaaatgagctctcagtgttcacttctggaagtggaggtggatatttgtctcagtatttTTCCCGATGCCTCCCATTCCTAtcgttcttaggtgctccttcctcttcctttcagctcat	Y	1	osa-MIR2118b,	osa-MIR2118b	atgagcgaggaagaggaagaaagaggtagtctaagagcagtgggaatgggaacatagaggaaaaatgagctctcagtgttcacttctggaagtggaggtggatatttgtctcagtatttTTCCCGATGCCTCCCATTCCTAtcgttcttaggtgctccttcctcttcctttcagctcat	1	osa-miR2118b	TTCCCGATGCCTCCCATTCCTA	(((((((((((((((((((...((.(((.(((((((((..(((((((((((.(((...(((((((((......((((((((((((((......))))))))))))).)......)))))))))..)))..)))))))))))..)))))))))))))))))))))))))))...))))))	45.8	-87	1.1
190	272	3'	osa-miR2118c	TTCCCGATGCCTCCTATTCCTA	22	Yes	0	0	0.5	0	0	0	0	0	0.465236	0	0	0	Chr4	-	21647968	21648064	tgggaataggaaCATGGAGGAAAGCCTaaagctaaattttctgctccagtattggagctagagatttgctcagttTTCCCGATGCCTCCTATTCCTA	Y	1	osa-MIR2118c,	osa-MIR2118c	tgggaataggaacatggaggaaagcctaaagctaaattttctgctccagtattggagctagagatttgctcagttTTCCCGATGCCTCCTATTCCTA	1	osa-miR2118c	TTCCCGATGCCTCCTATTCCTA	(((((((((((.(((...(((((((....(((.(((((((..(((((......)))))..))))))))))..)))))))..)))..)))))))))))	43.3	-40.8	1
191	273	3'	osa-miR2118e	TTCCCAATGCCTCCCATGCCTA	22	Yes	0	0	0.5	0	0	0.5	0	0	0.465236	0	0	0.560701	Chr4	-	21647428	21647604	agtgagtcaggaagaggaagAAAAGAGAGTCTAAGAGcagcaggcatgggaacatggaggaaaaaacatatatagttttcttcccctctaaagttagaggttgaaatttgctgtgtgtttTTCCCAATGCCTCCCATGCCTAcagttcttaggcactccttccacttcctgttggct	Y	1	osa-MIR2118e,	osa-MIR2118e	agtgagtcaggaagaggaagaaaagagagtctaagagcagcaggcatgggaacatggaggaaaaaacatatatagttttcttcccctctaaagttagaggttgaaatttgctgtgtgtttTTCCCAATGCCTCCCATGCCTAcagttcttaggcactccttccacttcctgttggct	1	osa-miR2118e	TTCCCAATGCCTCCCATGCCTA	((..((.(((((((.(((((....(((.((((((((((...((((((((((.(((...((((((...(((((((((....(((.((((((....))))))..)))....)))))))))))))))..)))..))))))))))...)))))))))).)))))))).)))))))))..))	44.1	-78.4	1
192	274	3'	osa-miR2118b	TTCCCGATGCCTCCCATTCCTA	22	Yes	1	0	0.25	0	0.5	0.5	1.0565	0	0.232618	0	0.617108	0.560701	Chr4	-	21661494	21661672	gtgagccaggaagaggaagaaagagagagcctaagagcagtgggaatgggaaCATGGAGGAAAGCCTaaaaaccaaatttcttcctccagcaatggaggtggaaatttggtttggttttTTCCCGATGCCTCCCATTCCTAtcgttcttaagcacttcttcctcttcctttcagctcgc	Y	1	osa-MIR2118n,	osa-MIR2118n	gtgagccaggaagaggaagaaagagagagcctaagagcagtgggaatgggaacatggaggaaagcctaaaaaccaaatttcttcctccagcaatggaggtggaaatttggtttggttttTTCCCGATGCCTCCCATTCCTAtcgttcttaagcacttcttcctcttcctttcagctcgc	1	osa-miR2118b	TTCCCGATGCCTCCCATTCCTA	((((((.(((((((((((((.....((.((.(((((((..(((((((((((.(((((..(((((((...((((((((((((..((((((....))))))..)))))))))))))))))))..)).)))..)))))))))))..))))))).)).)))))))))))))))....))))))	46.9	-101.7	1.2
193	275	3'	osa-miR2118c	TTCCCGATGCCTCCTATTCCTA	22	Yes	0	0	0.5	0	0	0	0	0	0.465236	0	0	0	Chr11	-	7810709	7810885	gtgagcaGGGAAGAGGAAGAAAgagagcctctaagagcgatgggaataggaacatggaggaaagcctgaagctaaattttctactccagtatcggagttagaaatttgctctgcgttTTCCCGATGCCTCCTATTCCTAccgatcttaggtactccttcctcttcctttaagctcat	Y	1	osa-MIR2118q,	osa-MIR2118q	gtgagcagggaagaggaagaaagagagcctctaagagcgatgggaataggaacatggaggaaagcctgaagctaaattttctactccagtatcggagttagaaatttgctctgcgttTTCCCGATGCCTCCTATTCCTAccgatcttaggtactccttcctcttcctttaagctcat	1	osa-miR2118c	TTCCCGATGCCTCCTATTCCTA	(((((((((((((((((((.....(((..(((((((.((.(((((((((((.(((((.(((((((..((.((.(((((((..(((((......)))))..))))))))))).)).))))))).)))..))))))))))).)).)))))))..))))))))))))))))...))))))	45.8	-80.9	1
194	276	3'	osa-miR2118e	TTCCCAATGCCTCCCATGCCTA	22	Yes	0	0	0.5	0	0	0.5	0	0	0.465236	0	0	0.560701	Chr11	-	7810223	7810397	gtgagtcgggaagaggaagAAAAGAGGGTCTAAGAGcagtgggcatgggaacatggaggaagaacatgtacttttcttccctctaaatttagaggttgagatttgctaagcatttTTCCCAATGCCTCCCATGCCTAcagttcttaggtactccttccccttcctgttggcttgc	Y	1	osa-MIR2118r,	osa-MIR2118r	gtgagtcgggaagaggaagaaaagagggtctaagagcagtgggcatgggaacatggaggaagaacatgtacttttcttccctctaaatttagaggttgagatttgctaagcatttTTCCCAATGCCTCCCATGCCTAcagttcttaggtactccttccccttcctgttggcttgc	1	osa-miR2118e	TTCCCAATGCCTCCCATGCCTA	(..((((((((((.(((((....(((..(((((((((.((((((((((((.(((...(((((((...(((..((((...((((((....))))))..))))..)))......)))))))..)))..)))))))))))).)))))))))..)))))))).))))))...))))..)	46.9	-80.5	1
195	277	5'	osa-MIR2122-p5_1ss15CT	GAACTTAGACACCTTAGCGCC	21	New	177	251	153	205	256	218	187.001	217.109	142.362	185.041	315.959	244.466	Chr2	+	8715222	8715433	tttcaaaaataaccttttgttcagcgcaaaatcgtatagcgctGAACTTAGACACCTCAGCGCCacgtcaactggcgctgaatgtcgtgccaccgtgaataggaggctgagtcagcgtgccaatgtacattcagcgtcgtgctatttagcgctgaggtgtctaagtttagtgccATATGATTTGGCGCTGAACAAAATggtaattttttaaa	Y	1	osa-MIR2122,	osa-MIR2122	TTTCAAAAATAACCTTTTGTTCagcgcaaaatcgtatagcgctgaacttagacacctcagcgccacgtcaactggcgctgaatgtcgtgccaccgtgaataggaggctgagtcagcgtgccaatgtacattcagcgtcgtgctatttagcgctgaggtgtctaagtttagtgccatatgatttggcgctgaacaaaatggtaattttttaaa	1	osa-MIR2122-p5	gaacttagacacctcagcgcc	....((((((.((((((((((((((((.(((((((((.(((((((((((((((((((((((((.......((.((((((((((((((.(((.((.......)).))))))....((((....)))).)))))))))))))........))))))))))))))))))))))))).))))))))).))))))))))))).))).))))))....	44.8	-113.7	1.2
195	278	3'	osa-MIR2122-p3_1ss4TC	ATACGATTTGGCGCTGAACAAAAT	24	New	11	5	3	10.5	8	6	11.6215	4.32488	2.79142	9.4777	9.87372	6.72842	Chr2	+	8715222	8715433	tttcaaaaataaccttttgttcagcgcaaaatcgtatagcgctGAACTTAGACACCTCAGCGCCacgtcaactggcgctgaatgtcgtgccaccgtgaataggaggctgagtcagcgtgccaatgtacattcagcgtcgtgctatttagcgctgaggtgtctaagtttagtgccATATGATTTGGCGCTGAACAAAATggtaattttttaaa	Y	1	osa-MIR2122,	osa-MIR2122	TTTCAAAAATAACCTTTTGTTCagcgcaaaatcgtatagcgctgaacttagacacctcagcgccacgtcaactggcgctgaatgtcgtgccaccgtgaataggaggctgagtcagcgtgccaatgtacattcagcgtcgtgctatttagcgctgaggtgtctaagtttagtgccatatgatttggcgctgaacaaaatggtaattttttaaa	1	osa-MIR2122-p3	atatgatttggcgctgaacaaaat	....((((((.((((((((((((((((.(((((((((.(((((((((((((((((((((((((.......((.((((((((((((((.(((.((.......)).))))))....((((....)))).)))))))))))))........))))))))))))))))))))))))).))))))))).))))))))))))).))).))))))....	44.8	-113.7	1.2
196	279	5'	osa-miR2863a	TTGTCCCATTCTAGTTTAGCT	21	Yes	1	8	3	9	1	8	1.0565	6.9198	2.79142	8.12374	1.23422	8.97122	Chr3	+	27108339	27108459	tgggtacccaTTGTCCCATTCTAGTTTAGCTaaatgaactactacagggagtaaattctatggaccaggaaaagtgagttttagttaatttagTTGAGCTAGAATGGGTCAATGGGTacct	Y	1	osa-MIR2863a,	osa-MIR2863a	tgggtacccaTTGTCCCATTCTAGTTTAGCTaaatgaactactacagggagtaaattctatggaccaggaaaagtgagttttagttaatttagttgagctagaatgggtcaatgggtacct	1	osa-miR2863a	TTGTCCCATTCTAGTTTAGCT	.((((((((((((.(((((((((((((((((((((.(((((..((.((((.....))))....((........))..))..))))).))))))))))))))))))))).))))))))))))	38.8	-59.1	1.3
197	280	5'	osa-MIR2863b-p5	CACTAGTTCAACTAAATGAAC	21	New	2	6	5	22	4	18	2.113	5.18985	4.65236	19.858	4.93686	20.1852	Chr2	-	4195665	4195765	tcttttacccaCACTAGTTCAACTAAATGAACtaaatttcacttttagaatcacaaaaaatgaaatgtagtTCGTTTATTTGGACTAGAGTGggtcaatta	Y	1	osa-MIR2863b,	osa-MIR2863b	tcttttacccacactagttcaactaaatgaactaaatttcacttttagaatcacaaaaaatgaaatgtagTTCGTTTATTTGGACTAGAGTgggtcaatta	1	osa-MIR2863b-p5	cactagttcaactaaatgaac	......((((((.(((((((((.(((((((((((.((((((.((((.........)))).)))))).))))))))))).))))))))).))))))......	29.7	-40.1	1.3
197	281	3'	osa-miR2863b_L-1R+1	TCGTTTATTTGGACTAGAGTG	21	Diff	1	15	1	49	35	16	1.0565	12.9746	0.930472	44.2293	43.1975	17.9424	Chr2	-	4195665	4195765	tcttttacccaCACTAGTTCAACTAAATGAACtaaatttcacttttagaatcacaaaaaatgaaatgtagtTCGTTTATTTGGACTAGAGTGggtcaatta	Y	1	osa-MIR2863b,	osa-MIR2863b	tcttttacccacactagttcaactaaatgaactaaatttcacttttagaatcacaaaaaatgaaatgtagTTCGTTTATTTGGACTAGAGTgggtcaatta	1	osa-miR2863b	TTCGTTTATTTGGACTAGAGT	......((((((.(((((((((.(((((((((((.((((((.((((.........)))).)))))).))))))))))).))))))))).))))))......	29.7	-40.1	1.3
198	282	3'	osa-miR2863c_L+1R-3	TTTAGTAGGACTAGAATGGGCC	22	Diff	1	5	9	5	1	6	1.0565	4.32488	8.37425	4.51319	1.23422	6.72842	Chr2	+	29869493	29869606	gggtatttcttgacccactttagttcaactaaaatgaactaagtttcacttttagagagtctaaagtgaaatttagttcaTTTAGTAGGACTAGAATGGGCCaaagaataccca	Y	1	osa-MIR2863c,	osa-MIR2863c	gggtatttcttgacccactttagttcaactaaaatgaactaagtttcacttttagagagtctaaagtgaaatttagttcatTTAGTAGGACTAGAATGGGCCAAAgaataccca	1	osa-miR2863c	TTAGTAGGACTAGAATGGGCCAAA	(((((((..(((.((((.((((((((.(((.(((((((((((((((((((((.((.....)))))))))))))))))))))))))).)))))))).)))).)))..))))))).	34.2	-59.9	1.5
199	283	5'	osa-miR2864.1_L-2R+2	TTGCTGCCCTTGTTTTGCATT	21	Diff	14	18	10	13	10	10	14.791	15.5696	9.30472	11.7343	12.3422	11.214	Chr12	-	25664721	25664821	tctattcagcttTTGCTGCCCTTGTTTTGCATTgtataggtatagcaatatgccattctgtagtggcataCCTCTACAGTGCAAAACAAGGACAacaagag	Y	1	osa-MIR2864,	osa-MIR2864	tctattcagcTTTTGCTGCCCTTGTTTTGCAttgtataggtatagcaatatgccattctgtagtggcatacctctacagtgcaaaacaaggacaacaagag	1	osa-miR2864.1	TTTTGCTGCCCTTGTTTTGCA	.........((((((.((.(((((((((((((((((.(((((........((((((......))))))))))).))))))))))))))))).)).))))))	40.6	-45.3	1.1
199	284	3'	osa-MIR2864-p3	CCTCTACAGTGCAAAACAAGGACA	24	New	0	1	1	2	2	5	0	0.864975	0.930472	1.80528	2.46843	5.60701	Chr12	-	25664721	25664821	tctattcagcttTTGCTGCCCTTGTTTTGCATTgtataggtatagcaatatgccattctgtagtggcataCCTCTACAGTGCAAAACAAGGACAacaagag	Y	1	osa-MIR2864,	osa-MIR2864	tctattcagcTTTTGCTGCCCTTGTTTTGCAttgtataggtatagcaatatgccattctgtagtggcatacctctacagtgcaaaacaaggacaacaagag	1	osa-MIR2864-p3	cctctacagtgcaaaacaaggaca	.........((((((.((.(((((((((((((((((.(((((........((((((......))))))))))).))))))))))))))))).)).))))))	40.6	-45.3	1.1
200	285	5'	osa-MIR2865-p5_L-3R+3	AGCAGTCGACTGTACCGTGCCT	22	Diff	5	8	2	14	9	8	5.28251	6.9198	1.86094	12.6369	11.1079	8.97122	Chr9	-	8515693	8515793	gatctgaatcctcAGCAGTCGACTGTACCGTGCCTttgtcattgatccacatgttagtgaaaaagGCACGGTGCAGTGACTGCAGAGGAtctcaatccgga	Y	1	osa-MIR2865,	osa-MIR2865	gatctgaatcCTCAGCAGTCGACTGTACCGTGcctttgtcattgatccacatgttagtgaaaaaggcacggtgcagtgactgcagaggatctcaatccgga	1	osa-MIR2865-p5	AGCAGTCGACTGTACCGTGcct	(((.(((((((((.((((((.((((((((((((((((.((((((((......)))))))).)))))))))))))))))))))).)))))).))))))....	49.5	-59.5	1.2
201	286	3'	osa-MIR2866-p3	TGCTGAGCACAAACTAGAGAA	21	New	6	13	15	6	4	6	6.33901	11.2447	13.9571	5.41583	4.93686	6.72842	Chr3	-	7331600	7331700	accctttttctctagtttgtgttcagcatctatgtcaactatgacgctgaacacaaactgacacagaTGCTGAGCACAAACTAGAGAAaaagggtcatatt	Y	1	osa-MIR2866,	osa-MIR2866	accctttttcTCTAGTTTGTGTTCAGCATCtatgtcaactatgacgctgaacacaaactgacacagatgctgagcacaaactagagaaaaagggtcatatt	1	osa-MIR2866-p3	tgctgagcacaaactagagaa	(((((((((((((((((((((((((((((((.(((((....((........)).....))))).)))))))))))))))))))))))))))))))......	39.6	-58.1	1.5
202	287	3'	osa-miR2867-3p	CCAGGACGTGTGGGATGGCA	20	Yes	5	1	1	3	2	0	5.28251	0.864975	0.930472	2.70791	2.46843	0					caattgacggcgTGTGCCATCCCACACATCCCGAtcatggcgtgtgacacaactggatgtgcgtgccacgaCCAGGACGTGTGGGATGGCAcatgttgtca	Y	1	osa-MIR2867,	osa-MIR2867	caattgacggcgTGTGCCATCCCACACATCCCGAtcatggcgtgtgacacaactggatgtgcgtgccacgaCCAGGACGTGTGGGATGGCAcatgttgtca	1	osa-miR2867-3p	CCAGGACGTGTGGGATGGCA	....((((..(((((((((((((((((.(((...((.(((((..((.((((......))))))))))).))...))).)))))))))))))))))..))))	57.4	-58	1
203	288	5'	osa-MIR2869-p5	TTGGGAGGTGGTGAGTACTAAG	22	New	4	2	1	1	1	2	4.22601	1.72995	0.930472	0.902638	1.23422	2.24281	Chr5	-	26915329	26915489	gggaggaggagcttcccaggatttaattTTGGGAGGTGGTGAGTACTAAGgagaacagtatgttgttcagctggcaggagctgcaaggagcaagccgctggccagggtttgatcCTTGGTACTCATTACCTCCCGacattaaattctgggcaggattaagt	Y	1	osa-MIR2869,	osa-MIR2869	gggaggaggagcttcccaggatttaattttgggaggtggtgagtactaaggagaacagtatgttgttcagctggcaggagctgcaaggagcaagccgctggccagggtttgatccttggtactcattaccTCCCGACATTAAATTCTGGGCaggattaagt	1	osa-MIR2869-p5	ttgggaggtggtgagtactaag	...........((((((((((((((((.(((((((((..(((((((((((((((((((....))))))..(((((((..(((((.....)).)))..)).))))).......)))))))))))))..))))))))).))))))))))))).))).......	50.3	-80.1	1
204	289	3'	osa-miR2870_L-1R+1	AATCAGTTTGGGGAGACAAAC	21	Diff	1	4	0	11	3	2	1.0565	3.4599	0	9.92902	3.70265	2.24281	Chr1	-	27181872	27182032	cttgtacttcagtttgtctctccaaactaattagtccaatgaacttctgattacaaatgagtaaccactAACTTCTGAGTTCTGATTatggagatataactattgcaatttctttccaaagttcattgcactAATCAGTTTGGGGAGACAAACtgaaatgc	Y	1	osa-MIR2870,	osa-MIR2870	cttgtacttcagtttgtctctccaaactaattagtccaatgaacttctgattacaaatgagtaaccactaacttctgagttctgattatggagatataactattgcaatttctttccaaagttcattgcacTAATCAGTTTGGGGAGACAAActgaaatgc	1	osa-miR2870	TAATCAGTTTGGGGAGACAAA	...(((.(((((((((((((((((((((.((((((.((((((((((..((.....(((.((.(((((........)).))))).)))..((((((............)))))).))..)))))))))).)))))).))))))))))))))))))))).)))	34.8	-59.6	1.1
205	290	5'	osa-miR2871a-5p_L+1R-4	TGACCGTAGAAACTAGCATAG	21	Diff	30.5	37.5	36	61.5	65.5	78.5	32.2233	32.4366	33.497	55.5122	80.8411	88.0301	Chr5	+	3877013	3877133	catggTGACCGTAGAAACTAGCATAGaaaaaagtagatatctcaagtgactttgttcatttacgttgggatagacaagtaactaccttttctATTTTAGTTTCTATGGTCACTttggtggc	Y	1	osa-MIR2871a,	osa-MIR2871a	catggtGACCGTAGAAACTAGCATAGAAAAaagtagatatctcaagtgactttgttcatttacgttgggatagacaagtaactaccttttcTATTTTAGTTTCTATGGTCACtttggtggc	1	osa-miR2871a-5p	GACCGTAGAAACTAGCATAGAAAA	((..((((((((((((((((..((((((((..((((.((((((((((((..........)))).)))))))).........)))).))))))))..))))))))))))))))..)).....	36.4	-43.1	1
205	291	3'	osa-miR2871a-3p_L-1R+1	ATTTTAGTTTCTATGGTCACT	21	Diff	1.33333	4.66667	4	5	3.33333	11.6667	1.40867	4.03655	3.72189	4.51319	4.11405	13.083	Chr5	+	3877013	3877133	catggTGACCGTAGAAACTAGCATAGaaaaaagtagatatctcaagtgactttgttcatttacgttgggatagacaagtaactaccttttctATTTTAGTTTCTATGGTCACTttggtggc	Y	1	osa-MIR2871a,	osa-MIR2871a	catggtGACCGTAGAAACTAGCATAGAAAAaagtagatatctcaagtgactttgttcatttacgttgggatagacaagtaactaccttttcTATTTTAGTTTCTATGGTCACtttggtggc	1	osa-miR2871a-3p	TATTTTAGTTTCTATGGTCAC	((..((((((((((((((((..((((((((..((((.((((((((((((..........)))).)))))))).........)))).))))))))..))))))))))))))))..)).....	36.4	-43.1	1
206	292	5'	osa-MIR2871b-p5	ACCATGGTGACCGTAGAAACTA	22	New	2	2	6	1	10	10	2.113	1.72995	5.58283	0.902638	12.3422	11.214	Chr4	+	8340799	8340939	atggctgcccACCATGGTGACCGTAGAAACTAacatagaaaaagaggtagatatctcaagtgactttgttcatttacgttggaatagacaagtaactaccttttctATTTTAGTTTCTATGGTCACTatggtggcagccat	Y	1	osa-MIR2871b,	osa-MIR2871b	atggctgcccaccatggtgaccgtagaaactaacatagaaaaagaggtagatatctcaagtgactttgttcatttacgttggaatagacaagtaactaccttttcTATTTTAGTTTCTATGGTCACtatggtggcagccat	1	osa-MIR2871b-p5	accatggtgaccgtagaaacta	(((((((.(((((((((((((((((((((((((.((((((((.(((((....))))).(((.((((.((..((((......))))..)))))).)))...)))))))).))))))))))))))))))))))))))))))))	39	-74.3	1.4
206	293	3'	osa-miR2871a-3p_L-1R+1	ATTTTAGTTTCTATGGTCACT	21	Diff	1.33333	4.66667	4	5	3.33333	11.6667	1.40867	4.03655	3.72189	4.51319	4.11405	13.083	Chr4	+	8340799	8340939	atggctgcccACCATGGTGACCGTAGAAACTAacatagaaaaagaggtagatatctcaagtgactttgttcatttacgttggaatagacaagtaactaccttttctATTTTAGTTTCTATGGTCACTatggtggcagccat	Y	1	osa-MIR2871b,	osa-MIR2871b	atggctgcccaccatggtgaccgtagaaactaacatagaaaaagaggtagatatctcaagtgactttgttcatttacgttggaatagacaagtaactaccttttcTATTTTAGTTTCTATGGTCACtatggtggcagccat	1	osa-miR2871a-3p	TATTTTAGTTTCTATGGTCAC	(((((((.(((((((((((((((((((((((((.((((((((.(((((....))))).(((.((((.((..((((......))))..)))))).)))...)))))))).))))))))))))))))))))))))))))))))	39	-74.3	1.4
207	294	5'	osa-MIR2873a-p5	ACCAAATTTCAAGTTCAAACTC	22	New	0	4	2.5	17.5	7	23.5	0	3.4599	2.32618	15.7962	8.63951	26.353	Chr11	-	28933582	28933682	aatatattcttACCAAATTTCAAGTTCAAACTCaactttatttgtgagaatttttgtttctctcaaatgaagttAAGTTTGGACTTAAATTTGGTAACaat	Y	1	osa-MIR2873a,	osa-MIR2873a	aatatattcttaccaaatttcaagttcaaactcaactttatttgtgagaatttttgtttctctcaaatgaagttAAGTTTGGACTTAAATTTGGTAACaat	1	osa-MIR2873a-p5	accaaatttcaagttcaaactc	.........(((((((((((.(((((((((((.(((((((((((.(((((.......))))).))))))))))).))))))))))))))))))))))....	24.8	-43.4	1.7
207	295	3'	osa-miR2873a	AAGTTTGGACTTAAATTTGGTAAC	24	Yes	54	165.5	52	139.5	33	101.5	57.0511	143.153	48.3846	125.918	40.7291	113.822	Chr11	-	28933582	28933682	aatatattcttACCAAATTTCAAGTTCAAACTCaactttatttgtgagaatttttgtttctctcaaatgaagttAAGTTTGGACTTAAATTTGGTAACaat	Y	1	osa-MIR2873a,	osa-MIR2873a	aatatattcttaccaaatttcaagttcaaactcaactttatttgtgagaatttttgtttctctcaaatgaagttAAGTTTGGACTTAAATTTGGTAACaat	1	osa-miR2873a	AAGTTTGGACTTAAATTTGGTAAC	.........(((((((((((.(((((((((((.(((((((((((.(((((.......))))).))))))))))).))))))))))))))))))))))....	24.8	-43.4	1.7
208	296	5'	osa-MIR2873b-p5_1ss5AC	AAATCTCAAGTTCAAACTCAAC	22	New	0	2	1.5	7.5	2	9.5	0	1.72995	1.39571	6.76979	2.46843	10.6533	Chr2	+	18974743	18974902	tacattcccaccAAATATCAAGTTCAAACTCAACtttatttaggagtaacagaaaagacattttgggtgaatggtaacatgacactattcacctagaatttctcttttttgtttctctcaaatgaagctaAGTTTGGACTTGAGATTTGGTatgaatgta	Y	1	osa-MIR2873b,	osa-MIR2873b	tacattcccaccaaatatcaagttcaaactcaactttatttaggagtaacagaaaagacaaattttgggtgaatggtaacatgacactattcacctagaatttctcttttttgtttctctcaaatgaagctaagtTTGGACTTGAGATTTGGTATGaatgta	0	osa-MIR2873b-p5	aaatatcaagttcaaactcaac	(((((((..(((((((.(((((((((((((...((((((((..(((.(((((((((((.((((((((((((((((........))))))))))))))))...))))))))))).)))..))))))))...))))))))))))).)))))))..)))))))	32.5	-75.7	1.5
208	297	3'	osa-MIR2873b-p3_1ss7GA_L+3R-3	AGTTTGAACTTGAGATTTGGT	21	Diff	1	10.5	10	8.5	6	14	1.0565	9.08224	9.30472	7.67242	7.40529	15.6996	Chr2	+	18974743	18974902	tacattcccaccAAATATCAAGTTCAAACTCAACtttatttaggagtaacagaaaagacattttgggtgaatggtaacatgacactattcacctagaatttctcttttttgtttctctcaaatgaagctaAGTTTGGACTTGAGATTTGGTatgaatgta	Y	1	osa-MIR2873b,	osa-MIR2873b	tacattcccaccaaatatcaagttcaaactcaactttatttaggagtaacagaaaagacaaattttgggtgaatggtaacatgacactattcacctagaatttctcttttttgtttctctcaaatgaagctaagtTTGGACTTGAGATTTGGTATGaatgta	0	osa-MIR2873b-p3	agtTTGGACTTGAGATTTGGT	(((((((..(((((((.(((((((((((((...((((((((..(((.(((((((((((.((((((((((((((((........))))))))))))))))...))))))))))).)))..))))))))...))))))))))))).)))))))..)))))))	32.5	-75.7	1.5
209	298	3'	osa-MIR2874-p3	TGGAACTAACATGTGAACAGT	21	New	4	7	5	3	2	6	4.22601	6.05483	4.65236	2.70791	2.46843	6.72842	Chr8	+	15598028	15598128	acactatgttTGCACTGTTTGGAACTGTTCACATGttggttcccggcagtaaaactgcTGGAACTAACATGTGAACAGTgtcaaacagtgtcaaatagtgt	Y	1	osa-MIR2874,	osa-MIR2874	acactatgtttgcactgtttggaactgttcacatgttggttcccggcagtaaaactgctggaactaacATGTGAACAGTGTCAAACAGTGTCaaatagtgt	1	osa-MIR2874-p3	tggaactaacATGTGAACAGT	(((((((....((((((((((..((((((((((((((((((((.(((((.....)))))))))))))))))))))))))..))))))))))...)))))))	41.6	-64.6	1.5
210	299	5'	osa-miR2876-5p_L-2R+2	TTGCTGGCAGCACTGTTTATA	21	Diff	4	1	1	4	1	2	4.22601	0.864975	0.930472	3.61055	1.23422	2.24281	Chr6	-	17008975	17009155	tttttgaggaaaTTGCTGGCAGCACTGTTTATAtagaaatttctgtaaaataattgctcctgagcttgtgtttgtcataaatgttagttgttactgtagatgtttctttccttaaaagtttccctaaacattcttgcttgtttacaggaattCCTATATGAACACTGTTGCCAGcaatttg	Y	1	osa-MIR2876,	osa-MIR2876	tttttgaggaAATTGCTGGCAGCACTGTTTAtatagaaatttctgtaaaataattgctcctgagcttgtgtttgtcataaatgttagttgttactgtagatgtttctttccttaaaagtttccctaaacattcttgcttgtttacaggaaTTCCTATATGAACACTGTTGCcagcaatttg	1	osa-miR2876-5p	AATTGCTGGCAGCACTGTTTA	.........(((((((((((((((.(((((((((((.((((((((((((......((..((((..(((((.....)))))...))))..))....((((((((((((((.....)))).......)))))))..)))...)))))))))))).))))))))))).))))))))))))))).	33.1	-57.9	1
210	300	3'	osa-miR2876-3p_L-2R+3	CCTATATGAACACTGTTGCCAG	22	Diff	5	2	3	4	1	7	5.28251	1.72995	2.79142	3.61055	1.23422	7.84982	Chr6	-	17008975	17009155	tttttgaggaaaTTGCTGGCAGCACTGTTTATAtagaaatttctgtaaaataattgctcctgagcttgtgtttgtcataaatgttagttgttactgtagatgtttctttccttaaaagtttccctaaacattcttgcttgtttacaggaattCCTATATGAACACTGTTGCCAGcaatttg	Y	1	osa-MIR2876,	osa-MIR2876	tttttgaggaAATTGCTGGCAGCACTGTTTAtatagaaatttctgtaaaataattgctcctgagcttgtgtttgtcataaatgttagttgttactgtagatgtttctttccttaaaagtttccctaaacattcttgcttgtttacaggaaTTCCTATATGAACACTGTTGCcagcaatttg	1	osa-miR2876-3p	TTCCTATATGAACACTGTTGC	.........(((((((((((((((.(((((((((((.((((((((((((......((..((((..(((((.....)))))...))))..))....((((((((((((((.....)))).......)))))))..)))...)))))))))))).))))))))))).))))))))))))))).	33.1	-57.9	1
211	301	5'	osa-MIR2877-p5	ATCATCCGATGTCCAAAGTGCAGA	24	New	2	4	1	4	5	3	2.113	3.4599	0.930472	3.61055	6.17108	3.36421	Chr4	-	28585228	28585568	aatcttggtttaatgtATCATCCGATGTCCAAAGTGCAGAtgacgcagcttgggtgctgatgtggcaatccacggtggtgagaattttgcatttagccccctcatgctacagtatgccttcaagtctactcccaccactcccaaatcttttggtgcatggcttaaactatgaatttgctggatgctgagaaatgcatatttgttgatttggggtggtaggagtcgatttcggggcatactatagtgaagaggcgtaagtgcaaaattctcgtcactgtggacaagcctgagTTGCATCCTCTGCACTTTGGGCCTcgagtgatacattaaaccaagattaa	Y	1	osa-MIR2877,	osa-MIR2877	aatcttggtttaatgtatcatccgatgtccaaagtgcagatgacgcagcttgggtgctgatgtggcaatccacggtggtgagaattttgcatttagccccctcatgctacagtatgccttcaagtctactcccaccactcccaaatcttttggtgcatggcttaaactatgaatttgctggatgctgagaaatgcatatttgttgatttggggtggtaggagtcgatttcggggcatactatagtgaagaggcgtaagtgcaaaattctcgtcactgtggacaagcctgagTTGCATCCTCTGCACTTTGGGCCTcgagtgatacattaaaccaagattaagggtgttttttagagggaaa	0	osa-MIR2877-p5	atcatccgatgtccaaagtgcaga	((((((((((((((((((((..(((.((((((((((((((.((.((((((..((((((.....)))..(((((((((..(((((((((((((((((((..((...((((.(((((((((..(((((.(((((.(((((.((((((((.....((((((..((((............((.....))))))..)))))).......))))))))))))).))))).)))))..))))))))).))))..)).))).))))))))))))))))..)))))))))...)))..)))))).)).)))))))))))))).)))..))))))))))))))))))))..	45.2	-190.1	1.2
211	302	3'	osa-miR2877_1ss16TA	TTGCATCCTCTGCACATTGGGCCT	24	Diff	66	82	40	37	119	83	69.7291	70.928	37.2189	33.3976	146.872	93.0764	Chr4	-	28585228	28585568	aatcttggtttaatgtATCATCCGATGTCCAAAGTGCAGAtgacgcagcttgggtgctgatgtggcaatccacggtggtgagaattttgcatttagccccctcatgctacagtatgccttcaagtctactcccaccactcccaaatcttttggtgcatggcttaaactatgaatttgctggatgctgagaaatgcatatttgttgatttggggtggtaggagtcgatttcggggcatactatagtgaagaggcgtaagtgcaaaattctcgtcactgtggacaagcctgagTTGCATCCTCTGCACTTTGGGCCTcgagtgatacattaaaccaagattaa	Y	1	osa-MIR2877,	osa-MIR2877	aatcttggtttaatgtatcatccgatgtccaaagtgcagatgacgcagcttgggtgctgatgtggcaatccacggtggtgagaattttgcatttagccccctcatgctacagtatgccttcaagtctactcccaccactcccaaatcttttggtgcatggcttaaactatgaatttgctggatgctgagaaatgcatatttgttgatttggggtggtaggagtcgatttcggggcatactatagtgaagaggcgtaagtgcaaaattctcgtcactgtggacaagcctgagTTGCATCCTCTGCACTTTGGGCCTcgagtgatacattaaaccaagattaagggtgttttttagagggaaa	0	osa-miR2877	TTGCATCCTCTGCACTTTGGGCCT	((((((((((((((((((((..(((.((((((((((((((.((.((((((..((((((.....)))..(((((((((..(((((((((((((((((((..((...((((.(((((((((..(((((.(((((.(((((.((((((((.....((((((..((((............((.....))))))..)))))).......))))))))))))).))))).)))))..))))))))).))))..)).))).))))))))))))))))..)))))))))...)))..)))))).)).)))))))))))))).)))..))))))))))))))))))))..	45.2	-190.1	1.2
212	303	5'	osa-miR2878-5p	TACATGTATAAAATTCTGAGGATG	24	Yes	6	11	3	10	5	24	6.33901	9.51473	2.79142	9.02638	6.17108	26.9137	Chr8	+	26181373	26181473	ataatgtttctttagttcttTACATGTATAAAATTCTGAGGATGttatatatatgacatcctCAGGATTTTATACATGTAAAGAATtaaacatacattata	Y	1	osa-MIR2878,	osa-MIR2878	ataatgtttctttagttcttTACATGTATAAAATTCTGAGGATGttatatatatgacatcctCAGGATTTTATACATGTAAAGAATtaaacatacattata	1	osa-miR2878-5p	TACATGTATAAAATTCTGAGGATG	(((((((...((((((((((((((((((((((((((((((((((((((....))))))))))))))))))))))))))))))))))))))...))))))).	22.8	-57.9	2.5
212	304	3'	osa-miR2878-3p	CAGGATTTTATACATGTAAAGAAT	24	Yes	0	4	3	3	4	5	0	3.4599	2.79142	2.70791	4.93686	5.60701	Chr8	+	26181373	26181473	ataatgtttctttagttcttTACATGTATAAAATTCTGAGGATGttatatatatgacatcctCAGGATTTTATACATGTAAAGAATtaaacatacattata	Y	1	osa-MIR2878,	osa-MIR2878	ataatgtttctttagttcttTACATGTATAAAATTCTGAGGATGttatatatatgacatcctCAGGATTTTATACATGTAAAGAATtaaacatacattata	1	osa-miR2878-3p	CAGGATTTTATACATGTAAAGAAT	(((((((...((((((((((((((((((((((((((((((((((((((....))))))))))))))))))))))))))))))))))))))...))))))).	22.8	-57.9	2.5
213	305	3'	osa-miR2879	GCCAGATGTGTTAAAATAATGACC	24	Yes	18	11	6	9	14	7	19.017	9.51473	5.58283	8.12374	17.279	7.84982	Chr2	-	18895908	18896208	tgcccagacgcgctctggTCATTATTCTAACATATCCGGAtcaactggagagagaatttttagaaaggatgtttgtgcacttgttcaacctgtttaacaatcacaatcagatcacaaaagattatactgacactaaattcatctgatctagtactttatttttccgcataatgcctcttgttttgactacttgatcatttttagatgtttgtcaatggatggcacgagggtaaaagcgccatttataaaatttaatctctccaattgaGCCAGATGTGTTAAAATAATGACCatagtatgt	Y	1	osa-MIR2879,	osa-MIR2879	tgcccagacgcgctctggtcattattctaacatatccggatcaactggagagagaatttttagaaaggatgtttgtgcacttgttcaacctgtttaacaatcacaatcagatcacaaaagattatactgacactaaattcatctgatctagtactttatttttccgcataatgcctcttgttttgactacttgatcatttttagatgtttgtcaatggatggcacgagggtaaaagcgccatttataaaatttaatctctccaattgaGCCAGATGTGTTAAAATAATGACCatagtatgt	1	osa-miR2879	GCCAGATGTGTTAAAATAATGACC	.......(((..((.(((((((((((.(((((((((.((.((((.(((((((((((((((..(((.((.(((((.(((.((((((((.((...................((((......))))....(((((.......(((((((((.((((.((.........((.....))..........)).)))).))))......)))))..)))))..)).))).))))).))).))))))).)))..)))))))..)))))))).)))).)).))))))))).))))))))))).))..)))	35.5	-86.2	0.8
214	306	5'	osa-miR2880	ACGGTATCCCGTTCGGACAGGATG	24	Yes	54	53	29	23	36	21	57.0511	45.8437	26.9837	20.7607	44.4318	23.5495	Chr3	+	22741618	22741797	atgctacaggACGGTATCCCGTTCGGACAGGATGatacctcagaggtatcgtctgatacccaggtatgccaatacctagtaggtattggcgataccttgaggtatcatcatgtccaaacggggtatcagccgataccttagatgatcatcccgtctgaacgggaaaccgtcccgtagcat	Y	1	osa-MIR2880,	osa-MIR2880	atgctacaggACGGTATCCCGTTCGGACAGGATGatacctcagaggtatcgtctgatacccaggtatgccaatacctagtaggtattggcgataccttgaggtatcatcatgtccaaacggggtatcagccgataccttagatgatcatcccgtctgaacgggaaaccgtcccgtagcat	1	osa-miR2880	ACGGTATCCCGTTCGGACAGGATG	(((((((.(((((((.((((((((((((.(((((((...((..((((((((.(((((((((..((..(((((((((.....)))))))))((((((....))))))...........)).))))))))).))))))))..))..))))))).)))))))))))).))))))).)))))))	50	-113.3	1.3
215	307	5'	osa-MIR2905-p5	TTTGTCACTGACATGTGGGCC	21	New	5	0	8	5	8	7	5.28251	0	7.44378	4.51319	9.87372	7.84982	Chr3	-	13591894	13591974	actgcactgtgccTTTGTCACTGACATGTGGGCCcattgatctccaggccTACATGTCAGTGACAAAGGCAcgatgcagtc	Y	1	osa-MIR2905,	osa-MIR2905	actgcactgtgcctttgtcactgacatgtgggcccattgatctccaggccTACATGTCAGTGACAAAGGCAcgatgcagtc	1	osa-MIR2905-p5	tttgtcactgacatgtgggcc	((((((..((((((((((((((((((((((((((............))))))))))))))))))))))))))..)))))).	53.1	-60.5	1.4
215	308	3'	osa-miR2905	TACATGTCAGTGACAAAGGCA	21	Yes	2	1	4	4	1	2	2.113	0.864975	3.72189	3.61055	1.23422	2.24281	Chr3	-	13591894	13591974	actgcactgtgccTTTGTCACTGACATGTGGGCCcattgatctccaggccTACATGTCAGTGACAAAGGCAcgatgcagtc	Y	1	osa-MIR2905,	osa-MIR2905	actgcactgtgcctttgtcactgacatgtgggcccattgatctccaggccTACATGTCAGTGACAAAGGCAcgatgcagtc	1	osa-miR2905	TACATGTCAGTGACAAAGGCA	((((((..((((((((((((((((((((((((((............))))))))))))))))))))))))))..)))))).	53.1	-60.5	1.4
216	309	5'	osa-miR3979-5p_R+1	TCTCTCTCTCCCTTGAAGGCT	21	Diff	5	7	12	3	4	2	5.28251	6.05483	11.1657	2.70791	4.93686	2.24281	Chr11	+	19480150	19480263	ggttttcttggaTCTCTCTCTCCCTTGAAGGCTatctcatggaggtttgatgtacaccattgttgcctaagaaactgagaaagcCTTCGGGGGAGGAGAGAAGCcaagcaagcc	Y	1	osa-MIR3979,	osa-MIR3979	ggttttcttggaTCTCTCTCTCCCTTGAAGGCtatctcatggaggtttgatgtacaccattgttgcctaagaaactgagaaagcCTTCGGGGGAGGAGAGAAGCcaagcaagcc	1	osa-miR3979-5p	TCTCTCTCTCCCTTGAAGGC	(((((.(((((.((((((.(((((..(((((((.(((((...((((..((((.....))))...)))).......))))).)))))))..)))))))))))..))))).)))))	49.1	-58.3	1
216	310	3'	osa-miR3979-3p	CTTCGGGGGAGGAGAGAAGC	20	Yes	0	0	0	0	3	1	0	0	0	0	3.70265	1.1214	Chr11	+	19480150	19480263	ggttttcttggaTCTCTCTCTCCCTTGAAGGCTatctcatggaggtttgatgtacaccattgttgcctaagaaactgagaaagcCTTCGGGGGAGGAGAGAAGCcaagcaagcc	Y	1	osa-MIR3979,	osa-MIR3979	ggttttcttggaTCTCTCTCTCCCTTGAAGGCtatctcatggaggtttgatgtacaccattgttgcctaagaaactgagaaagcCTTCGGGGGAGGAGAGAAGCcaagcaagcc	1	osa-miR3979-3p	CTTCGGGGGAGGAGAGAAGC	(((((.(((((.((((((.(((((..(((((((.(((((...((((..((((.....))))...)))).......))))).)))))))..)))))))))))..))))).)))))	49.1	-58.3	1
217	311	5'	osa-miR3980a-5p	AATCGACGGCCTCAGTCAGGG	21	Yes	316	248	119	210	104	137	333.854	214.514	110.726	189.554	128.358	153.632					gcggcgtcttcctcttcttcaccttaggagAATCGACGGCCTCAGTCAGGGgcgccttccccttgagctcgggagacgcgttctgctttggctgggggcgcaggctccggcgggccctcatcatcaccggagtcagacacttcgtcCTGGCCGAGGCCGTCGATTCTcctagcgggaagaggaagacgccgc	Y 测序和miRBsae都没有染色体起始与终止	2	osa-MIR3980b,osa-MIR3980a,	osa-MIR3980a	gcggcgtcttcctcttcttccccttaggagAATCGACGGCCTCAGTCAGGGgcgccttccccttgagctcgggagacgcattctgctttggctgggggcgcaggctccggcgggcccttgtcgtcaccggaattagacacttcgtcCTGGCCGAGGCCGTCGATTCTcctagcgggaagaggaagacgccgc	0	osa-miR3980a-5p	AATCGACGGCCTCAGTCAGGG	(((((((((((((((((....((((((((((((((((((((((.((((((.(((((..(.((..((((..(((........))))))).))..)..))))).((((((((..((......))....))))))))...........)))))).)))))))))))))))))))).)))))))))))))))))))	65.1	-123.5	1
218	312	5'	osa-MIR3982-p5_L-5R+5	CCACGTAGGCAACAATTTTGC	21	Diff	3	6	0	3	2	7	3.1695	5.18985	0	2.70791	2.46843	7.84982	Chr11	-	1384740	1384958	cgatgtggcgctCCACGTAGGCAACAATTTTGCatccggcccccttttgcaggacagcgtggtggtaatattgtacttagcccctttgagccacagtaccaccccgaaactccccgaaatccccaaatccctcctccctcacaggagctcaaaggagctaagtgcaatttttggatgaggctggacgcaaaaTAGTTGCCTACATGGAGCGCCacgtcg	Y	1	osa-MIR3982,	osa-MIR3982	cgatgtgGCGCTCCACGTAGGCAACAATtttgcatccggcccccttttgcaggacagcgtggtggtaatattgtacttagcccctttgagccacagtaccaccccgaaactccccgaaatccccaaatccctcctccctcacaggagctcaaaggagctaagtgcaatttttggatgaggctggacgcaaaatAGTTGCCTACATGGAGCGCCAcgtcg	1	osa-MIR3982-p5	CCACGTAGGCAACAATtttgc	(((((((((((((((.(((((((((.(((((((.(((((((((((..(((......))).)).))....((((((((((((.(((((((((.............((........))...............((((.......))))))))))))).))))))))))))..........))))))).))))))).))))))))).)))))))))))))))	53.9	-107.1	0.9
218	313	3'	osa-miR3982-3p_L+1R-1	TAGTTGCCTACATGGAGCGCC	21	Diff	20	25	12	22	15	33	21.13	21.6244	11.1657	19.858	18.5132	37.0063	Chr11	-	1384740	1384958	cgatgtggcgctCCACGTAGGCAACAATTTTGCatccggcccccttttgcaggacagcgtggtggtaatattgtacttagcccctttgagccacagtaccaccccgaaactccccgaaatccccaaatccctcctccctcacaggagctcaaaggagctaagtgcaatttttggatgaggctggacgcaaaaTAGTTGCCTACATGGAGCGCCacgtcg	Y	1	osa-MIR3982,	osa-MIR3982	cgatgtgGCGCTCCACGTAGGCAACAATtttgcatccggcccccttttgcaggacagcgtggtggtaatattgtacttagcccctttgagccacagtaccaccccgaaactccccgaaatccccaaatccctcctccctcacaggagctcaaaggagctaagtgcaatttttggatgaggctggacgcaaaatAGTTGCCTACATGGAGCGCCAcgtcg	1	osa-miR3982-3p	AGTTGCCTACATGGAGCGCCA	(((((((((((((((.(((((((((.(((((((.(((((((((((..(((......))).)).))....((((((((((((.(((((((((.............((........))...............((((.......))))))))))))).))))))))))))..........))))))).))))))).))))))))).)))))))))))))))	53.9	-107.1	0.9
219	314	5'	osa-miR5072_L-2_1ss3AG	GTTCCCCAGCGGAGTCGCCA	20	Diff	302	268	233	259	90	76	319.063	231.813	216.8	233.783	111.079	85.2266					gctgaatagatCGATTCCCCAGCGGAGTCGCCAaaaatcgtgttggcaacttttttgacaagtcgacaagcacgat	Y	1	osa-MIR5072,	osa-MIR5072	gctgaatagatCGATTCCCCAGCGGAGTCGCCAaaaatcgtgttggcaacttttttgacaagtcgacaagcacgat	1	osa-miR5072	CGATTCCCCAGCGGAGTCGCCA	(((.......((((((...(((..((((.(((((........))))).))))..)))...))))))..))).....	47.4	-19.4	0.5
220	315	5'	osa-miR5073_R+1_1ss20AT	GTTTGGTGAATCGGAAACTTTTTT	24	Diff	0	1	3	3	20	6	0	0.864975	2.79142	2.70791	24.6843	6.72842	Chr8	+	19020495	19020601	ataagaattaGTTTGGTGAATCGGAAACTATTTTtcaattttatagaaaaagtccatgtaattttatgatcaataatagttttcgttttccccaaaccgtctaaact	Y	1	osa-MIR5073,	osa-MIR5073	ataagaattaGTTTGGTGAATCGGAAACTATTTttcaattttatagaaaaagtccatgtaattttatgatcaataatagttttcgttttccccaaaccgtctaaact	1	osa-miR5073	GTTTGGTGAATCGGAAACTATTT	...(((....((((((.(((.(((((((((((........((((((((.............)))))))).....)))))))))))..))).))))))..))).....	27.1	-23.9	0.8
221	316	5'	osa-miR5077_1ss5GA	GTTCACGTCGGGTTCACCA	19	Diff	0	0	6	8	0	1	0	0	5.58283	7.2211	0	1.1214	Chr3	+	14094752	14094842	tgccttttcgttGTTCGCGTCGGGTTCACCAgctaggtggttcgccatgaagtacagGAAGGGGGTCGCCGGCGagtccaacgatgacgac	Y	1	osa-MIR5077,	osa-MIR5077	tgccttttcgttGTTCGCGTCGGGTTCACCAgctaggtggttcgccatgaagtacaggaagggggtcgccggcgagtccaacgatgacgac	1	osa-miR5077	GTTCGCGTCGGGTTCACCA	.........((((((..(((.((..((.((.....(((((..(.((..............)))..))))))).))..)).)))..))))))	59.3	-27.5	0.5
222	317	5'	osa-MIR5081-p5_1ss17TA	ACAAAACTGCAACTTTAACGT	21	New	2	18	8	12	19	18	2.113	15.5696	7.44378	10.8317	23.4501	20.1852	Chr7	-	16888	17137	atagtgacaaactatcagtttgttgcaacattagtgatctatttcagtttgctgcaataatagcgtggaaaattatcACAAAACTGCAACTTTTACGTgatatgctactacatgacaattgtagcagcatatcacgtactgtagcagcatatcacgtaaaagttacagttttatgatAACTTCCCATGCTATTGTTGCAACaaactaaaatagataactaatttgtagcaaattgatagttttatcacta	Y	1	osa-MIR5081,	osa-MIR5081	atagtgacaaactatcagtttgttgcaacattagtgatctatttcagtttgctgcaataatagcgtggaaaattatcacaaaactgcaacttttacgtgatatgctactacatgacaattgtagcagcatatcacgtactgtagcagcatatcacgtaaaagttacagttttatgataacttcccatgctattgttgcaacaaactaaaatagataacTAATTTGTAGCAAATTGATAGTtttatcacta	1	osa-MIR5081-p5	acaaaactgcaacttttacgt	.((((((.((((((((((((((((((((.((((((.((((((((.((((((.((((((((((((((((.((.((((((.(((((((.(((((((((((((((((((.(((((..((...(((....)))......))..))))).))))))))))))))))))).))))))).)))))).)).)))))))))))))))).)))))).)))))))).))))))))))))))))))))))))))..))))))	32	-126.3	1.6
223	318	3'	osa-miR5082_L-1R-1	GCGATGATGGCCGCGCGGGTTC	22	Diff	51	43	25	43	48	54	53.8816	37.1939	23.2618	38.8134	59.2423	60.5557	Chr12	+	1170415	1170893	ntagggctcaggcagcttggtgcgggagagaggcggcggcgaaggggagagatcgcttcgagagagcgattttatagcGAGGGGATTAGGGTTTagctctagtgggccatgggggatagttagtgggccattatgggctgggctagaattagttgggccttcgcgagcccatttggtgggcgcgtttttcgcttgtaaaaaggccgtgggggaggaggcggcgagctagggtttcgaccctcacgaacactacttgatcttatctgagcttgccgtccggcggcgccgcggctgccggagtcgcctctccggcattcgcgccgccaccgctgtcctcgtacggttggcgggaaggtggcgcgctttgttcggggaaagaggcgggtttggtatccgtgg…	N	1	osa-MIR5082,	osa-MIR5082	ggcgggcgggtgagcgcggcggccatggttgcggcggtggtggcgcgcggcggcggcggcggctagggctcaggcggcttggtgcgggagagaggcggcggcgaaggggagagatcgcttcgagagagtgattttatagcgaggggattagggtttagctctagtgggccatgggggatagttagtggaccactatgggccgggctagaattagttgggccttcgcgagcccaacttgtgggctagtttttcgcttgtaaaaggccatggggggaggaggcggcgagctagggtttcgaccctcacgaacactacttgatcttatccgagcttgccgtccggcggcgccgcggcggccggagtcgcctctccgacattcgcgccgccaccgacgtcctc…	0	osa-miR5082	TGCGATGATGGCCGCGCGGGTTCA	.(((((.(((((..((((..(((..(.((((..((...(((((((...(((((((((.(....))))))))))....(((...((((..(((..(((((((((((.((((..(......)..)))).)))))).)))))..)))..))))..)))..)))))))..((((((...)))))).))..)))).)..)))...))))((((((((..((..(((....))...)..))..)))))))).......)))))))))).....(((..(((.(((((((((((((((.((((..(..(((((((((((((..(((((((((.(((((..((......))..)))))...)))))))))...)).))))....)))))))..)..)))).))))))…	62.8	-238.1	0.8
224	319	3'	osa-MIR5143a-p3_L-6R+4	ATGTTGGCAATGTAGGAAGTCT	22	Diff	2	5	2	3.5	1.5	3	2.113	4.32488	1.86094	3.15923	1.85132	3.36421	Chr1	-	8417107	8417315	cctcATACTTCCTCATTGACCAATAtaccacaaaacactacaatgttggcctctttaccactatcaagacacttctcccagtccattttgtctgttgagcatcaggacattaataagtgtggagtgccttgctctacatcatcctctgtaaacagtctggggttgcagttttatgtggtATGTTGGCAATGTAGGAAGTCTgaatcgta	Y	1	osa-MIR5143a,	osa-MIR5143a	cctcatacttcctcattgaccaatataccacaaaacactacaatgttggcctctttaccactatcaagacacttctcccagtccattttgtctgttgagcatcaggacattaataagtgtggagtgccttgctctacatcatcctctgtaaacagtctggggttgcagttttaTGTGGTATGTTGGCAATGTAGGAAgtctgaatcgta	1	osa-MIR5143a-p3	ATGTTGGCAATGTAGGAAgtct	..(((.((((((((((((.(((((((((((((.((.(((.(((..(..(.((.(((((......................((((....((((....)).))...))))........(((((((((.....)))))))))........))))).)).)..)..))).))).)).)))))))))))))))))).))))))).)))......	42.1	-69	0.8
225	320	3'	osa-MIR5143b-p3_L-6R+4	ATGTTGGCAATGTAGGAAGTCT	22	Diff	1	5	2	2.5	2.5	3	1.0565	4.32488	1.86094	2.2566	3.08554	3.36421	Chr1	-	8415808	8415998	tgactcaTGCTTCCATGTTGACCAACATACCaccaaaatattatgatgttcgcatgttgccctgtttaccactattaatcaagacactccccctcctctcttttgttttcctggtgaacatcaatatattggtaaacaggctaaggttgtaattttctgtggtATGTTGGCAATGTAGGAAGTCTgaatgg	Y	1	osa-MIR5143b,	osa-MIR5143b	tgactcatgcttccatgttgaccaacataccaccaaaatattatgatgttcgcatgttgccctgtttaccactattaatcaagacactccccctcctctcttttgttttcctggtgaacatcaatatattggtaaacaggctaaggttgtaattttcTGTGGTATGTTGGCAATGTAGGAAgtctgaatgg	1	osa-MIR5143b-p3	ATGTTGGCAATGTAGGAAgtct	....(((..((((((..(((.((((((((((((..(((.((((..((....((.....))(((((((((((.(((.....((((((.................))))))..((((....))))..))).))))))))))).....))..)))))))..)))))))))))))))..).)))))..)))....	39.8	-58.2	0.8
226	321	5'	osa-miR5145_L-1R-1_1ss13TC	CCTGTTTGGATCCTTGAGGGCT	22	Diff	2	0	4	4	5	1	2.113	0	3.72189	3.61055	6.17108	1.1214	Chr1	-	40622637	40622718	ccaCCTGTTTGGATTCTTGAGGGCTaatttaaaattaaaatgtgagagctAAACATTAGTCCATAGAACCAAACagggccgc	Y	1	osa-MIR5145,	osa-MIR5145	ccACCTGTTTGGATTCTTGAGGGCTAatttaaaattaaaatgtgagagctaaacattagtccatagaaccaaacagggccgc	1	osa-miR5145	ACCTGTTTGGATTCTTGAGGGCTA	...(((((((((.((((...((((((((.............((....)).....))))))))..))))))))))))).....	40.2	-26.8	0.8
227	322	3'	osa-miR5146	TTTAACTAATGAACCGGCACCTAT	24	Yes	0	0	2	0	6	2	0	0	1.86094	0	7.40529	2.24281	Chr1	+	22418294	22418377	tataggtgctggttcttaaaaaaaccgatacCTATAGTATTTGTACCggtTTTAACTAATGAACCGGCACCTATacttcgtaaa	Y	1	osa-MIR5146,	osa-MIR5146	tataggtgctggttcttaaaaaaaccgatacctatagtatttgtaccggtTTTAACTAATGAACCGGCACCTATacttcgtaaa	1	osa-miR5146	TTTAACTAATGAACCGGCACCTAT	((((((((((((((((((..(((((((.(((...........))).)))))))...))).))))))))))))))).........	35.7	-33.1	1.1
228	323	5'	osa-MIR5147-p5_1ss21AG	TCCATCCACGAGAGTTGTACG	21	New	7	4	6	3	2	1	7.39551	3.4599	5.58283	2.70791	2.46843	1.1214	Chr2	-	17049859	17050224	ctagtactcgcTCCATCCACGAGAGTTGTACAtataacttttttcacagtgaccaaggagaacactaactcctctgatccatttattcatctatatggattcatacgcagtgtcgtttcgtttttcccgcatatcgcgcatacgcaaccaacagccccgccctcgtgcactggtgccgcatgcatgcagttgccttgccaattgcatgtgcatgctcaactggttggctgctcgggccgcgttatcaaattaatccatccgcagccatacgattactgcttcgaggcacaaacaaaatacgttcaactcttgtggataaactgagaaatgttatgcgCACAACTCTTGTGGATGGAGGgagtaatg	Y	1	osa-MIR5147,	osa-MIR5147	ctagtactcgctccatccacgagagttgtacatataacttttttcacagtgaccaaggagaacactaactcctctgatccatttattcatctatatggattcatacgcagtgtcgtttcgtttttcccgcatatcgcgcatacgcaaccaacagccccgccctcgtgcactggtgccgcatgcatgcagttgccttgccaattgcatgtgcatgctcaactggttggctgctcgggccgcgttatcaaattaatccatccgcagccatacgattactgcttcgaggcacaaacaaaatacgttcaactcttgtggataaactgagaaatgttatgcgcACAACTCTTGTGGATGGAGGGagtaatg	1	osa-MIR5147-p5	tccatccacgagagttgtaca	....(((((.(((((((((((((((((((...((((((.(((((((..(((.((.(((((........)))))..(((((((.((......)).))))))).....((((((((((...........(((.....))).....(((.(((((.((((.((......))...)).)).(((((((((((((((......))))))))..))))))).......))))).)))...(((.(((..................))).)))..)))).)))))).....)))))...........(((((.(....))))))....))))))).))))))...))))))))))))))))))).)))))...	47.3	-127.4	0.7
229	324	3'	osa-miR5148a_L+2R-2	AATGAGGGGTAGAAATGTCATATC	24	Diff	1	5.33333	1	1.33333	1.83333	5.66667	1.0565	4.6132	0.930472	1.20352	2.26273	6.35461	Chr3	-	9968953	9969028	cACGATATGACGTTTGTACCCCtcacaagtacaaatataatgcatgtcAATGAGGGGTAGAAATGTCATATCatgt	Y	1	osa-MIR5148a,	osa-MIR5148a	cacgatatgacgtttgtacccctcacaagtacaaatataatgcatgtcaaTGAGGGGTAGAAATGTCATATCATgt	1	osa-miR5148a	TGAGGGGTAGAAATGTCATATCAT	...((((((((((((.(((((((((((.(((.........))).)))....)))))))).))))))))))))....	38.2	-33.5	1.2
230	325	3'	osa-miR5148a_L+2R-2	AATGAGGGGTAGAAATGTCATATC	24	Diff	1	5.33333	1	1.33333	1.83333	5.66667	1.0565	4.6132	0.930472	1.20352	2.26273	6.35461	Chr6	+	27436650	27436727	tACGATATGACGTTTGTACCCCtcacaagtataagtataatgtatgtcAATGAGGGGTAGAAATGTCATATCatgtgt	Y	1	osa-MIR5148b,	osa-MIR5148b	tacgatatgacgtttgtacccctcacaagtataagtataatgtatgtcaaTGAGGGGTAGAAATGTCATATCATgtgt	1	osa-miR5148a	TGAGGGGTAGAAATGTCATATCAT	...((((((((((((.(((((((((...(((((.......))))).....))))))))).))))))))))))......	35.9	-35.2	1.3
231	326	3'	osa-miR5148a_L+2R-2	AATGAGGGGTAGAAATGTCATATC	24	Diff	1	5.33333	1	1.33333	1.83333	5.66667	1.0565	4.6132	0.930472	1.20352	2.26273	6.35461	Chr11	-	2813203	2813281	cACGATATGACGTTTGTACCCCtcacaagtacaagtataatgcatgtcAATGAGGGGTAGAAATGTCATATCatgtgtg	Y	1	osa-MIR5148c,	osa-MIR5148c	cacgatatgacgtttgtacccctcacaagtacaagtataatgcatgtcaaTGAGGGGTAGAAATGTCATATCATgtgtg	1	osa-miR5148a	TGAGGGGTAGAAATGTCATATCAT	(((((((((((((((.(((((((((.....(((.((.....)).)))...))))))))).))))))))))))..)))..	40.5	-35.6	1.1
232	327	5'	osa-miR5150-5p	AGCTTCTGACAGCTGCAGTTTCTC	24	Yes	27	34	24	8	23	14	28.5255	29.4092	22.3313	7.2211	28.387	15.6996	Chr4	+	18470790	18470868	gtttgggggAGCTTCTGACAGCTGCAGTTTCTCttgttctaggaGAAGCTGCAGCTGTCAGAAGCTCCcccaaacatgg	Y	1	osa-MIR5150,	osa-MIR5150	gtttgggggAGCTTCTGACAGCTGCAGTTTCTCttgttctaggAGAAGCTGCAGCTGTCAGAAGCTCccccaaacatgg	1	osa-miR5150-5p	AGCTTCTGACAGCTGCAGTTTCTC	((((((((((((((((((((((((((((((((((((...))))))))))))))))))))))))))))))))))))....	53.2	-70.9	1.7
232	328	3'	osa-miR5150-3p_L-1R+1	GAAGCTGCAGCTGTCAGAAGCTCC	24	Diff	75	90	62	37	68	84	79.2376	77.8478	57.6893	33.3976	83.9267	94.1978	Chr4	+	18470790	18470868	gtttgggggAGCTTCTGACAGCTGCAGTTTCTCttgttctaggaGAAGCTGCAGCTGTCAGAAGCTCCcccaaacatgg	Y	1	osa-MIR5150,	osa-MIR5150	gtttgggggAGCTTCTGACAGCTGCAGTTTCTCttgttctaggAGAAGCTGCAGCTGTCAGAAGCTCccccaaacatgg	1	osa-miR5150-3p	AGAAGCTGCAGCTGTCAGAAGCTC	((((((((((((((((((((((((((((((((((((...))))))))))))))))))))))))))))))))))))....	53.2	-70.9	1.7
233	329	5'	osa-MIR5151-p5	ATGAACAAAAATGTGACTATT	21	New	6	21	9	19	10	16	6.33901	18.1645	8.37425	17.1501	12.3422	17.9424	Chr5	-	3661490	3661638	gtttgcttcactaatgatgtgggtacgaATGAACAAAAATGTGACTATTttaagcttcactgttgatgactgatggcgacacgagtaacatgaagcctaaaatagtcaCATTTTTGTTCATTCGTACCTacatcattagtgaagcaaac	Y	1	osa-MIR5151,	osa-MIR5151	gtttgcttcacTAATGATGTGGGTACGAATGAAcaaaaatgtgactattttaagcttcactgttgatgactgatggcgacacgagtaacatgaagcctaaaatagtcacatttttgttcattcgtacctacatcattagtgaagcaaac	1	osa-MIR5151-p5	ATGAAcaaaaatgtgactatt	((((((((((((((((((((((((((((((((((((((((((((((((((((.((((((.((((....(((..((....))..))))))))))))).))))))))))))))))))))))))))))))))))))))))))))))))))))	36.9	-97.8	1.8
234	330	3'	osa-miR5152-3p	AGACCATGCCTATACCTACCA	21	Yes	1	0	2	0	0	4	1.0565	0	1.86094	0	0	4.48561	Chr5	-	28910038	28910253	taaaggtagggataggcatgatctctttctcaccAAATTTCTAAGACCAAACTCAacttcgtttggaaagttaaaataagacaaattttgcatgaaacttccctatcactatccgtgcaaagtttgtatttcttgtatcttgcaagcaaatttgaatttggtcttgaaattttgtggagatatAGACCATGCCTATACCTACCActaatatttatg	Y	1	osa-MIR5152,	osa-MIR5152	taaagGTAGGGATAGGCATGATCTCTttctcaccaaatttctaagaccaaactcaacttcgtttggaaagttaaaataagacaaattttgcatgaaacttccctatcactatccgtgcaaagtttgtatttcttgtatcttgcaagcaaatttgaatttggtcttgaaattttgtggagatatAGACCATGCCTATACCTACCActaatatttatg	1	osa-miR5152-3p	AGACCATGCCTATACCTACCA	....((((((.(((((((((.(((...((((((.(((((((.(((((((((.((((.((.(((((..(((.....(((((((((((((((((((...................)))))))))))))....))))))..))).))))).)).)))).)))))))))))))))).))).)))...))).))))))))).)))))).............	33.8	-78.2	1.1
235	331	3'	osa-MIR5153-p3	ATTCCACTGACACGTAGACGTCAC	24	New	7	9	10	5	12	9	7.39551	7.78478	9.30472	4.51319	14.8106	10.0926	Chr7	+	15399360	15399566	ccacgatagttcatacatgttagttggacccacgtgtcagtcacatataaaaaaatataagtagaaaaacATATTTTCTCCTCTCTACCTtagaatttttatctttttttctgtctacctaagaggagaaaatatggtttttaattttattttttatatatgcttgacatgtggATTCCACTGACATGTAGGCGTCACcgtggcatt	N	1	osa-MIR5153,	osa-MIR5153	ccacgatagtgtatacgtgttagttggactcacgtgctagtcacatagaataaaatataattagaaaaacatattttctcctctctaccttataatttttatcttttttctgtctacctaagaggagaaaatatggtttttaattttaatttttatatatgtttgacatgTGGATTCCACTGACACGTAGACGTcaccgtggcatt	0	osa-MIR5153-p3	ATTCCACTGACACGTAGACGTcac	(((((........((((((((((.((((.(((((((((((...((((((((((((((.((((..((((.(((((((((((((((......(((((.............)))))........))))))))))))))).))))..)))))))))))).)))))).)))))))))))..))))))))))))))........)))))....	32.9	-75.5	1.1
236	332	3'	osa-MIR5154-p3_1ss11AG_L-6R+6	AGTTGACGTGGCGCTGAGGTGTCT	24	Diff	9	5	6	0.5	9	2	9.50851	4.32488	5.58283	0.451319	11.1079	2.24281	Chr6	+	5263432	5263552	ttagacatctcagcaccaaatagcacggcgctggatATACGTTGGCATGCCGACTCAGCCtcccatctgtagtggcacggcattcagcaccAGTTGACGTGACGCTGAGGTGTCTaagttg	Y	1	osa-MIR5154,	osa-MIR5154	ttagacatctcagcaccaaatagcacggcgctggatatacgttggcatgccgactcagcctcccatctgtagtggcacggcattcAGCACCAGTTGACGTGACGCTGAGgtgtctaagttg	1	osa-MIR5154-p3	AGTTGACGTGACGCTGAGgtgtct	((((((((((((((..((..((((..((.((((((.....(((((....)))))...(((..((((.....))))...))).)))))).)).))))...))..))))))))))))))....	53.7	-50.1	0.8
237	333	5'	osa-MIR5156-p5	TCGTGAGGCAAAAGCCTGTAAAACT	25	New	0	0	0	0	4	2	0	0	0	0	4.93686	2.24281	Chr8	-	16955761	16956103	TCGTGAGGCAAAAGCCTGTAAAACTgcaaaaaggaacattatctctcctctctcccctagtgttaccgggactcccgtgtctaagaaaaatttgccgcgtcgacacgcatccccgtgtcgatgtgtatcagacgcgggacgacgcgcatcggacactgctagcgcgagtccaagtccaaaaggagagttgcaatcgctgctgctgtgctgcaaggtgaagtaataaagctctagcagcagtcctgtagtgtgtagggataaagcatgtgggagagagagagcaggtgagggagagaggagAGAGAATGTCCTTTTTGCAGTtttgcaggcttttgcctcacac	Y	1	osa-MIR5156,	osa-MIR5156	tcgtgaggcaaaAGCCTGTAAAACTGCAAAAAGGAAcattatctctcctctctcccctagtgttaccgggactcccgtgtctaagaaaaatttgccgcgtcgacacgcatccccgtgtcgatgtgtatcagacgcgggacgacgcgcatcggacactgctagcgcgagtccaagtccaaaaggagagttgcaatcgctgctgctgtgctgcaaggtgaagtaataaagctctagcagcagtcctgtagtgtgtagggataaagcatgtgggagagagagagcaggtgagggagagaggagagagaatgtcctttttgcagttttgcaggcttttgcctcacac	1	osa-MIR5156-p5	tcgtgaggcaaaAGCCTGTAAAACT	..(((((((((((((((((((((((((((((((((.((((.(((((((((((((((......(((((.....((((((((((.(((....)))..((((((((((((......))))))))))))....))))))))))..(((((((..((((.(((((((.((.........(((....)))..(((((..(((((..(((......))).))))).)))))...)).)))))))..))))..).))))))..............................)))))))))))))))))))).)))))))))))))))))))))))))))))))))))))..	51.6	-174.9	1
238	334	5'	osa-miR5179	TTTTGCTCAAGACCGCGCAAC	21	Yes	1	0	0	1	0	0	1.0565	0	0	0.902638	0	0	Chr2	+	12450910	12451133	ttgagaggcgTTTTGCTCAAGACCGCGCAACgattccatatgacaccgcatcgttgtccatgcctatcatgttcatccagagcccctgttgatcttcagataagagaaaagctcaaaattaaagaaggcttgtttattgatcatgtcaaggataggtatcgaCGGCGATGCGCTGGCTatggccatggttgtgcggttcttgcgcaataacgttttgatctcga	Y	1	osa-MIR5179,	osa-MIR5179	ttgagaggcgTTTTGCTCAAGACCGCGCAACgattccatatgacaccgcatcgttgtccatgcctatcatgttcatccagagcccctgttgatcttcagataagagaaaagctcaaaattaaagaaggcttgtttattgatcatgtcaaggataggtatcgacggcgatgcgctggctatggccatggttgtgcggttcttgcgcaataacgttttgatctcga	1	osa-miR5179	TTTTGCTCAAGACCGCGCAAC	((((((.(((((((((.((((((((((((((.((.(((((...((.(((((((..(((.((((((((((((.(((....(((((.(((........)))....(((.....)))............)))))......))).)))......))))))))).)))..))))))).))..)))))..)).)))))))))).)))).)))).))))).....))))))	46.4	-88.7	0.9
239	335	3'	osa-MIR5339-p3	TGGGAATATTCTTTATCTGTT	21	New	6	31	9	20	20	44	6.33901	26.8142	8.37425	18.0528	24.6843	49.3417	Chr6	-	29362467	29362823	atgctgtaaggcATCGTTAACAGATAGAGAATCTTCtcagaaaattctccaaatttgatgtttgaaatctgactgattctttgagaactgtgagcctgtagttaagctatcagcttgaaatcctttactgcagcactacatactccggaaccttgttactgttattagccaccagcaagccagctcaatttacagttagtgccaccacaaaaggactcttcccagttatatgtaagctataccacccagatattcagctacaccttgaaggcataagaagcatatgcttttggatacaatcaaatggagaatctgaTGGGAATATTCTTTATCTGTTaacaacaaacaaaggctcag	Y	1	osa-MIR5339,	osa-MIR5339	atgctgtaaggcatcgttaaCAGATAGAGAATCTTCTCAGAaaattctccaaatttgatgtttgaaatctgactgattctttgagaactgtgagcctgtagttaagctatcagcttgaaatcctttactgcagcactacatactccggaaccttgttactgttattagccaccagcaagccagctcaatttacagttagtgccaccacaaaaggactcttcccagttatatgtaagctataccacccagatattcagctacaccttgaaggcataagaagcatatgcttttggatacaatcaaatggagaatctgatgggaatattctttatctgttaacaacaaacaaaggctcag	1	osa-MIR5339-p3	tgggaatattctttatctgtt	(((((....))))).(((((((((((((((((.((((((....((((((((..((((((..((((((((((...((.(((((...((((((((((((((((((((((.....))))).........))))))).............((...((((((..((........))..)))))))).)))).....)))))).(((....)))..))))).)).....((((.......))))........))))).))))).......(..((((((((.......))))))))..).....))))))))))))))....)))))).))))))))))))))))).................	38.9	-95	0.7
240	336	3'	osa-miR5493_R+3	AGCCGGGCTCGGTCGCGCGTGCCT	24	Diff	34	60	42	50	60	24	35.921	51.8985	39.0798	45.1319	74.0529	26.9137	Chr2	+	22898044	22898300	cagaggcgggctccgtgccggcctgcccagctgcagatctcggatgtttccctgagacaAAAACAGAGAAGGAAGAGgcccatgtaagatgggctttcaagtcagctcaagcacccacttctcactaccgatgtcctctacaagcactattccctcgattagtaccataccgcttgccgaacgacgccaagaccagcttaaatacgcgcttcccaccatctccaccAGCCGGGCTCGGTCGCGCGTGCCTgttactc	Y	1	osa-MIR5493,	osa-MIR5493	cagaggcgggctccgtgccggcctgcccagctgcagatctcggatgtttccctgagacaaaaacagagaaggaagaggcccatgtaagatgggctttcaagtcagctcaagcacccacttctcactaccgatgtcctctacaagcactattccctcgattagtaccataccgcttgccgaacgacgccaagaccagcttaaatacgcgcttcccaccatctccaccAGCCGGGCTCGGTCGCGCGTGcctgttactc	1	osa-miR5493	AGCCGGGCTCGGTCGCGCGTG	.((..((((((..((((.(((((.((((.((((.((((.((((.((((((...))))))......((((((...(((((((((.....))))))))).......((....)).....))))))....)))).(((.((..(((((((((.((....)).))))........)))))..))..))).....((...((........))...)).....))))....)))).))))..))))))))).))))))..)).	56.8	-81.8	0.6
241	337	3'	osa-miR5504_R+1	AGTGACGGGAGGACTGCAAGGT	22	Diff	15	33	15	17	13	13	15.8475	28.5442	13.9571	15.3448	16.0448	14.5782	Chr10	-	17228165	17228262	attgctgaattttgttcgttggagcttgttctgttattttatttgcactgccgtaggaaatacacAGTGACGGGAGGACTGCAAGGTtcttcagcttt	Y	1	osa-MIR5504,	osa-MIR5504	attgctgaattttgttcgttggagcttgttctgttattttatttgcactgccgtaggaaatacacAGTGACGGGAGGACTGCAAGGttcttcagcttt	1	osa-miR5504	AGTGACGGGAGGACTGCAAGG	...((.((((...((((....))))..)))).))...........(((((..(((.....))).)))))...((((((((....))))))))......	41.8	-22.7	0.6
242	338	5'	osa-miR5508	TAGATGGCTGATCTGGTGTGG	21	Yes	2	2	4	9	13	18	2.113	1.72995	3.72189	8.12374	16.0448	20.1852	Chr6	-	638203	638355	gctattgaacTAGATGGCTGATCTGGTGTGGcttggctttgggtaagaaggattggcctctgtctagtgcctcactttccttctgcggttctgtctactgtcctggtttggaagaagTCAAACCAAGCCAGATCAGCCATCtagttgagtctc	Y	1	osa-MIR5508,	osa-MIR5508	gctattgaacTAGATGGCTGATCTGGTGTGGcttggctttgggtaagaaggattggcctctgtctagtgcctcactttccttctgcggttctgtctactgtcctggtttggaagaagtcaaaccaagccagatcagccatctagttgagtctc	1	osa-miR5508	TAGATGGCTGATCTGGTGTGG	...(((.(((((((((((((((((((..(((.((((((((..(((.((((((..(((((......)).)))......)))))))))..............(((......))).)))))))).)))..))))))))))))))))))).)))...	49	-69.1	0.9
243	339	5'	osa-miR5510	AGGCTGATCCACTCCAGAGGA	21	Yes	1	4	3	3	1	4	1.0565	3.4599	2.79142	2.70791	1.23422	4.48561	Chr12	-	19127914	19128038	gttggctcaaAGGCTGATCCACTCCAGAGGAggtttcgtaggacagatcccctcgattcattgtcactcgttcatggatcatcccgatgaacatcCTCAGGAGTGGATTGGGCTTCaagacagca	Y	1	osa-MIR5510,	osa-MIR5510	gttggctcaaAGGCTGATCCACTCCAGAGGAggtttcgtaggacagatcccctcgattcattgtcactcgttcatggatcatcccgatgaacatcctcaggagtggattgggcttcaagacagca	1	osa-miR5510	AGGCTGATCCACTCCAGAGGA	((((.((..(((.(..(((((((((.(((((...(((((.(((..(((((...(((...........))).....))))).)))..)))))..))))).)))))))))..).)))..)).)))).	51.2	-52.3	0.8
243	340	3'	osa-MIR5510-p3	CTCAGGAGTGGATTGGGCTTC	21	New	4	6	5	7	0	9	4.22601	5.18985	4.65236	6.31847	0	10.0926	Chr12	-	19127914	19128038	gttggctcaaAGGCTGATCCACTCCAGAGGAggtttcgtaggacagatcccctcgattcattgtcactcgttcatggatcatcccgatgaacatcCTCAGGAGTGGATTGGGCTTCaagacagca	Y	1	osa-MIR5510,	osa-MIR5510	gttggctcaaAGGCTGATCCACTCCAGAGGAggtttcgtaggacagatcccctcgattcattgtcactcgttcatggatcatcccgatgaacatcctcaggagtggattgggcttcaagacagca	1	osa-MIR5510-p3	ctcaggagtggattgggcttc	((((.((..(((.(..(((((((((.(((((...(((((.(((..(((((...(((...........))).....))))).)))..)))))..))))).)))))))))..).)))..)).)))).	51.2	-52.3	0.8
244	341	5'	osa-MIR5513-p5	AGTCCGTTGTCCTTTGTGATA	21	New	2	3	1	4	2	4	2.113	2.59493	0.930472	3.61055	2.46843	4.48561	Chr3	+	34008003	34008148	gtcattattcttcAGTCCGTTGTCCTTTGTGATAacatatctgtacttatacgtttgttcatttaggatagacaaggctcaaagccacgctagctgacattagccggatatgttaTAACAAAGGACAACAGACTGAagaataatga	Y	1	osa-MIR5513,	osa-MIR5513	gtcattattcttcagtccgttgtcctttgtgataacatatctgtacttatacgtttgttcatttaggatagacaaggctcaaagccacgctagctgacattagccggatatgttaTAACAAAGGACAACAGACTGAagaataatga	1	osa-MIR5513-p5	agtccgttgtcctttgtgata	.((((((((((((((((.((((((((((((.((((((((((((.........((((((((.....))))))))..(((.....)))..(((((......))))))))))))))))).)))))))))))).))))))))))))))))	37.7	-71.7	1.3
244	342	3'	osa-miR5513	TAACAAAGGACAACAGACTGA	21	Yes	1	11	4	25	2	6	1.0565	9.51473	3.72189	22.566	2.46843	6.72842	Chr3	+	34008003	34008148	gtcattattcttcAGTCCGTTGTCCTTTGTGATAacatatctgtacttatacgtttgttcatttaggatagacaaggctcaaagccacgctagctgacattagccggatatgttaTAACAAAGGACAACAGACTGAagaataatga	Y	1	osa-MIR5513,	osa-MIR5513	gtcattattcttcagtccgttgtcctttgtgataacatatctgtacttatacgtttgttcatttaggatagacaaggctcaaagccacgctagctgacattagccggatatgttaTAACAAAGGACAACAGACTGAagaataatga	1	osa-miR5513	TAACAAAGGACAACAGACTGA	.((((((((((((((((.((((((((((((.((((((((((((.........((((((((.....))))))))..(((.....)))..(((((......))))))))))))))))).)))))))))))).))))))))))))))))	37.7	-71.7	1.3
245	343	5'	osa-miR5539_L-3R+2	AAAACGGATGCGCGTGCTAAC	21	Diff	0	2	1	6	5	1	0	1.72995	0.930472	5.41583	6.17108	1.1214	Chr12	-	20548894	20548969	gattcaaagcaagAAAACGGATGCGCGTGCTAACgcTTTCGCGCTAGTGCGCTCAatccgttgcttgtttggaaca	Y	1	osa-MIR5539,	osa-MIR5539	gattcaaagcAAGAAAACGGATGCGCGTGCTAacgctttcgcgctagtgcgctcaatccgttgcttgtttggaaca	1	osa-miR5539	AAGAAAACGGATGCGCGTGCTA	..(((.(((((((..((((((((.(((..(((.(((....))).)))..))).).))))))).))))))).)))..	50	-34.1	0.9
246	344	5'	osa-MIR5540-p5_1ss6AC	ATATACCGTCGATCTCGCAC	20	New	3	2	1	4	0	1	3.1695	1.72995	0.930472	3.61055	0	1.1214	Chr1	-	35552728	35553070	ttttgcgataATATAACGTCGATCTCGCACgatctcgcacaaccgttgcgcgaaaatgacgtggatgtgacattgcagacggtattgcgcattgaaagtacgagaccgcaccgtgcacgataattaatcactaattattattagctaatagttaattatgtacttgatcactaattaaatggagccggttaatactgtcgcagactgtttcagcaagacctcgctctttcatttcgtaagaccgcgcggtctcgcacatagcccacgcgataccgcctgcgacgtcacgcatccgttattttcgcgcaatgaTTGTGCGAGATCGACGGTATAttttcgcaaa	Y	1	osa-MIR5540,	osa-MIR5540	ttttgcgataatataacgtcgatctcgcacgatctcgcacaaccgttgcgcgaaaatgacgtggatgtgacattgcagacggtattgcgcattgaaagtacgagaccgcaccgtgcacgataattaatcactaattattattagctaatagttaattatgtacttgatcactaattaaatggagccggttaatactgtcgcagactgtttcagcaagacctcgctctttcatttcgtaagaccgcgcggtctcgcacatagcccacgcgataccgcctgcgacgtcacgcatccgttattttcgcgcaatgaTTGTGCGAGATCGACGGTATAttttcgcaaa	1	osa-MIR5540-p5	atataacgtcgatctcgcac	.(((((((.((((((.((((((((((((((((((..........(((((((((((((((((.((.((((((.((((((.((((((((((........((.(((((((((...(((((..(((((((....(((((....)))))....))))).))..))))).................(((((.((((....(((..((.....))..)))...))))..)))))......((....))....))))))))).))........)))))))))).)))))).))))))..))))))))))))))))))))))))))))))))))))).)))))).)))))))	45.5	-149.8	1
246	345	3'	osa-miR5540	TTGTGCGAGATCGACGGTATA	21	Yes	3	2	3	3	2	1	3.1695	1.72995	2.79142	2.70791	2.46843	1.1214	Chr1	-	35552728	35553070	ttttgcgataATATAACGTCGATCTCGCACgatctcgcacaaccgttgcgcgaaaatgacgtggatgtgacattgcagacggtattgcgcattgaaagtacgagaccgcaccgtgcacgataattaatcactaattattattagctaatagttaattatgtacttgatcactaattaaatggagccggttaatactgtcgcagactgtttcagcaagacctcgctctttcatttcgtaagaccgcgcggtctcgcacatagcccacgcgataccgcctgcgacgtcacgcatccgttattttcgcgcaatgaTTGTGCGAGATCGACGGTATAttttcgcaaa	Y	1	osa-MIR5540,	osa-MIR5540	ttttgcgataatataacgtcgatctcgcacgatctcgcacaaccgttgcgcgaaaatgacgtggatgtgacattgcagacggtattgcgcattgaaagtacgagaccgcaccgtgcacgataattaatcactaattattattagctaatagttaattatgtacttgatcactaattaaatggagccggttaatactgtcgcagactgtttcagcaagacctcgctctttcatttcgtaagaccgcgcggtctcgcacatagcccacgcgataccgcctgcgacgtcacgcatccgttattttcgcgcaatgaTTGTGCGAGATCGACGGTATAttttcgcaaa	1	osa-miR5540	TTGTGCGAGATCGACGGTATA	.(((((((.((((((.((((((((((((((((((..........(((((((((((((((((.((.((((((.((((((.((((((((((........((.(((((((((...(((((..(((((((....(((((....)))))....))))).))..))))).................(((((.((((....(((..((.....))..)))...))))..)))))......((....))....))))))))).))........)))))))))).)))))).))))))..))))))))))))))))))))))))))))))))))))).)))))).)))))))	45.5	-149.8	1
247	346	3'	osa-MIR5542-p3	ATTTACAATAGAAAAAATGGTACC	24	New	4	12	7	4	3	5	4.22601	10.3797	6.5133	3.61055	3.70265	5.60701	Chr4	-	32797606	32797757	ttctacggtCTTTGAGAAGGTATCATGAGATacaaaaaatttagtgtaaaatttagtatcttatgatacctcatagtacctaggtaccataagatactaaATTTACAATAGAAAAAATGGTACCttgtgatacctcctcaaggaacgtaaaa	Y	1	osa-MIR5542,	osa-MIR5542	ttctacggtcTTTGAGAAGGTATCATGAGATacaaaaaatttagtgtaaaatttagtatcttatgatacctcatagtacctaggtaccataagatactaaatttacaatagaaaaaatggtaccttgtgatacctcctcaaggaacgtaaaa	1	osa-MIR5542-p3	atttacaatagaaaaaatggtacc	...((((.((((((((.((((((((..((.(((......((((.(((.(((((((((((((((((.(((((..........))))).)))))))))))))))))))).)))).......))).))..)))))))).)))))))).))))...	30.9	-62.6	1.3
248	347	3'	osa-MIR5788-p3_1ss20AG	AGATTCGTAGTACTAGGATGTGTC	24	New	3	4	7	5	0	6.5	3.1695	3.4599	6.5133	4.51319	0	7.28912	Chr9	-	16582523	16582786	aaccccgtattgaacacatactagtgctatgaccttagatacatgatatgcatgttcAGATTCGTAGTACTAGTATGTGTCttatattttgggatg	Y	2	osa-MIR5788,osa-MIR816,	osa-MIR5788	aaaaaaacgattctagaacTGGATGTGACATACTCTAGTAcaatgaatctggatagaggtatatccagattcgtagtactaggatatgtcacatccagtactagattgattttttt	0	osa-MIR5788-p3	agattcgtagtactaggatatgtc	...((((...((((((((((((((((((((((..((.((.(((((.....)))))))))..))))))))))))))))))).))).....))))...	36.5	-37.9	1.1
248	348	5'	osa-miR5788	TGGATGTGACATACTCTAGTA	21	Yes	49	87.5	114	80	60	146	51.7686	75.6853	106.074	72.211	74.0529	163.725					aaaaaaacgattctagaacTGGATGTGACATACTCTAGTAcaatgaatctggatagaggtatatccagattcgtagtactaggatatgtcacatccagtactagattgattttttt	Y	1	osa-MIR5788,	osa-MIR5788	aaaaaaacgattctagaacTGGATGTGACATACTCTAGTAcaatgaatctggatagaggtatatccagattcgtagtactaggatatgtcacatccagtactagattgattttttt	1	osa-miR5788	TGGATGTGACATACTCTAGTA	((((((((((.(((((.(((((((((((((((..(((((((.(((((((((((((......))))))))))))).)))))))..))))))))))))))).)))))))).)))))))	33.6	-67.4	1.7
249	349	5'	osa-miR2871a-5p_L+1R-4	TGACCGTAGAAACTAGCATAG	21	Diff	30.5	37.5	36	61.5	65.5	78.5	32.2233	32.4366	33.497	55.5122	80.8411	88.0301	Chr5	+	3876822	3877257	catcgatatggctgcaagactgtttgcgattccccatgaaatccaaatatggaaatcaaaaggcttgaagtagatactgttggcatacacacaaccatagagttcatcttcagaaccaaatccacgttcttgaaaatatgaggagggtgctgctggaagaacaacaatcgctcatcgtgatggctgcccaccatggTGACCGTAGAAACTAGCATAGaaaaaagtagatatctcaagtgactttgttcatttacgttgggatagacaagtaactaccttttctattttagtttctatggtcactttggtggcagccatgatagacagaaacaaaggctcaccgatgaaacccaggacttgctctacttcaagcttattgttttctatattctggatttc…	N	1	osa-MIR5794,	osa-MIR5794	catcgatatggctgcaagactgtttgcgattccccatgaaatccaaatatggaaatcaaaaggcttgaagtagatactgttggcatacacacaaccatagagttcatcttcagaaccaaatccacgttcttgaaaatatgaggagggtgctgctggaagaacaacaatcgctcatcgtgatggctgcccaccatggtGACCGTAGAAACTAGCATAGAAAAaagtagatatctcaagtgactttgttcatttacgttgggatagacaagtaactaccttttcTATTTTAGTTTCTATGGTCACtttggtggcagccatgatagacagaaacaaaggctcaccgatgaaacccaggacttgctctacttcaagcttattgttttctatattctggatttc…	1	osa-miR2871a-5p	GACCGTAGAAACTAGCATAGAAAA	(((.(((((.((((...((((..(...((((((.((.((((((((((((((((((.(((.((((((((((((((....((((.........))))....((((((...((((((((.........)))).))))..........((((..((.((......)).)).....((((((..(((((((.((((((..((((((((((((((((..((((((((..((((.((((((((((((..........)))).)))))))).........)))).))))))))..))))))))))))))))..)))))))))))))........((.........))..)))))).)))).))))))..)))))))))))))).))).)))))))))).))))))))…	41.3	-165.1	0.9
249	350	3'	osa-MIR5794-p3	TGAGGAATCACTAGTAGTCGT	21	New	200.333	397.667	424	375	271.833	520.667	211.652	343.972	394.52	338.489	335.501	583.877	Chr5	+	3876822	3877257	catcgatatggctgcaagactgtttgcgattccccatgaaatccaaatatggaaatcaaaaggcttgaagtagatactgttggcatacacacaaccatagagttcatcttcagaaccaaatccacgttcttgaaaatatgaggagggtgctgctggaagaacaacaatcgctcatcgtgatggctgcccaccatggTGACCGTAGAAACTAGCATAGaaaaaagtagatatctcaagtgactttgttcatttacgttgggatagacaagtaactaccttttctattttagtttctatggtcactttggtggcagccatgatagacagaaacaaaggctcaccgatgaaacccaggacttgctctacttcaagcttattgttttctatattctggatttc…	N	1	osa-MIR5794,	osa-MIR5794	catcgatatggctgcaagactgtttgcgattccccatgaaatccaaatatggaaatcaaaaggcttgaagtagatactgttggcatacacacaaccatagagttcatcttcagaaccaaatccacgttcttgaaaatatgaggagggtgctgctggaagaacaacaatcgctcatcgtgatggctgcccaccatggtGACCGTAGAAACTAGCATAGAAAAaagtagatatctcaagtgactttgttcatttacgttgggatagacaagtaactaccttttcTATTTTAGTTTCTATGGTCACtttggtggcagccatgatagacagaaacaaaggctcaccgatgaaacccaggacttgctctacttcaagcttattgttttctatattctggatttc…	1	osa-MIR5794-p3	tgaggaatcactagtagtcgt	(((.(((((.((((...((((..(...((((((.((.((((((((((((((((((.(((.((((((((((((((....((((.........))))....((((((...((((((((.........)))).))))..........((((..((.((......)).)).....((((((..(((((((.((((((..((((((((((((((((..((((((((..((((.((((((((((((..........)))).)))))))).........)))).))))))))..))))))))))))))))..)))))))))))))........((.........))..)))))).)))).))))))..)))))))))))))).))).)))))))))).))))))))…	41.3	-165.1	0.9
250	351	3'	osa-miR5804	TGCGAAGTAGAGATGCCGACT	21	Yes	0	0	0	0	2	4	0	0	0	0	2.46843	4.48561	Chr4	-	20810160	20810286	gatcagattgcaTCGGCATCTCTACTCTGCAGCcgctgcctctgccgcctctttcatccgctgtccgtgcgacggcaagagagtgttgacagcggcTGCGAAGTAGAGATGCCGACTtgatctgagc	Y	1	osa-MIR5804,	osa-MIR5804	gatcagattgcatcggcatctctactctgcagccgctgcctctgccgcctctttcatccgctgtccgtgcgacggcaagagagtgttgacagcggcTGCGAAGTAGAGATGCCGACTtgatctgagc	1	osa-miR5804	TGCGAAGTAGAGATGCCGACT	..(((((((...((((((((((((((..((((((((((..((...((((((((......((((((.....))))))))))).)))..))))))))))))..))))))))))))))...)))))))..	58.3	-71.8	1
251	352	5'	osa-miR5805	ACGAGTGATGGCGGCGTATACCTG	24	Yes	1	0	0	2	2	1	1.0565	0	0	1.80528	2.46843	1.1214	Chr12	-	13821490	13821896	cgacatcagcACGAGTGATGGCGGCGTATACCTGcgggaaggcggcggcggcatgaaggtacaggggcaagcagctgcgcggcgcagcctgctggagcacctccaagacgttgcggcacttgttctgctcaatacacaagcaaaataatgaggatagctagcgtttggggatgggccaggcggccaacatgacgaggtaatgatggagctgcttgtgcgccggcagaagtagtgggactgcatggatatggccacacagacacccagttggcctgcaggctctggcatcgaagttcttctcgcgccccgggagcactgcgctgcagctgcttgccccatccgcctccaccacgccgtcggatgtcgcctctgcaggtgCACGCCGTCGCCACCCGTGTT…	Y	1	osa-MIR5805,	osa-MIR5805	cgacatcagcACGAGTGATGGCGGCGTATACCTGcgggaaggcggcggcggcatgaaggtacaggggcaagcagctgcgcggcgcagcctgctggagcacctccaagacgttgcggcacttgttctgctcaatacacaagcaaaataatgaggatagctagcgtttggggatgggccaggcggccaacatgacgaggtaatgatggagctgcttgtgcgccggcagaagtagtgggactgcatggatatggccacacagacacccagttggcctgcaggctctggcatcgaagttcttctcgcgccccgggagcactgcgctgcagctgcttgccccatccgcctccaccacgccgtcggatgtcgcctctgcaggtgcacgccgtcgccacccgtgtt…	1	osa-miR5805	ACGAGTGATGGCGGCGTATACCTG	(..((((((((((.(((..((((((((..((((((((..(((((((((((((.((.((((...(((((((((((((((..(((((((..(((..((((.(((((.(((((((((....((..((.((((.........))))....))..))....)).)))))))..))).)).....(((((((((...................(((((((.(((....))).)))))))(((.(((..(((......)))..)))...))).))))))).))..))))..))).........((((((.....))))))..))))))))))))))))))))))....)))).))....))))))....)))))))))))))))..))))))))..))).))))))…	61.9	-202.8	0.8
252	353	3'	osa-miR5809_R+1	TCGTCGCCGGCGACCACAGCT	21	Diff	15	7	13	2	10	6	15.8475	6.05483	12.0961	1.80528	12.3422	6.72842	Chr4	-	23527607	23527669	gtaaacgctggtagcagcggcgacgagaatagatggcgTCGTCGCCGGCGACCACAGCAcaac	Y	1	osa-MIR5809,	osa-MIR5809	gtaaacgctggtagcagcggcgacgagaatagatggcgTCGTCGCCGGCGACCACAGCacaac	1	osa-miR5809	TCGTCGCCGGCGACCACAGC	......((((((.((.(((((((((...........)))))))))..)).))))..)).....	61.9	-24	0.6
253	354	3'	osa-miR5810_R-2_1ss13TC	ACGGAACCCTAACGGCGATGGC	22	Diff	11	7	6	10	2	8	11.6215	6.05483	5.58283	9.02638	2.46843	8.97122	Chr12	-	7333292	7333419	gtgcttcataaatgcttttctccacttagggttccgttagcaaccctccattAAGTACTATAGGATGAAcagtgcatttatcggtgtgggatggACGGAACCCTAATGGCGATGGCatttatgggaca	Y	1	osa-MIR5810,	osa-MIR5810	gtgcttcataaatgcttttctccacttagggttccgttagcaaccctccattaagtactataggatgaacagtgcatttatcggtgtgggatggACGGAACCCTAATGGCGATGGCATttatgggaca	1	osa-miR5810	ACGGAACCCTAATGGCGATGGCAT	.((..(((((((((((..((.(((.(((((((((((((..((.(((.((..((((((((...........)))))..)))..))...))).)))))))))))))))))).)).)))))))))))..))	45.3	-49.9	0.9
254	355	5'	osa-miR5811_1ss1CA	ACTAACCTAGGAGTTCGATGGGAC	24	Diff	3	9	1	10	5	9	3.1695	7.78478	0.930472	9.02638	6.17108	10.0926					aaaaaaaaaaCCTAACCTAGGAGTTCGATGGGACataagattatgtctcatccaacttctaggttagtttttttttt	Y	1	osa-MIR5811,	osa-MIR5811	aaaaaaaaaaCCTAACCTAGGAGTTCGATGGGACataagattatgtctcatccaacttctaggttagtttttttttt	1	osa-miR5811	CCTAACCTAGGAGTTCGATGGGAC	((((((((((.((((((((((((((.(((((((((((....))))))))))).))))))))))))))))))))))))	31.2	-41.2	1.7
255	356	5'	osa-MIR5813-p5	ATGACCAGGTCACTGCTTGCC	21	New	6	2	1	0	0	0	6.33901	1.72995	0.930472	0	0	0	Chr4	-	9952990	9953124	tggtgagctaattttcATGACCAGGTCACTGCTTGCCtttgcagtaccattatgggttaccgtgccagattgagggaaggaatgaaaagggtaaagcaaaggcAAGCAGCGACTCTGGTCATGGAattggagcca	Y	1	osa-MIR5813,	osa-MIR5813	tggtgagctaattttcatgaccaggtcactgcttgcctttgcagtaccattatgggttaccgtgccagattgagggaaggaatgaaaagggtaaagcaaaggcAAGCAGCGACTCTGGTCATGGAattggagcca	1	osa-MIR5813-p5	atgaccaggtcactgcttgcc	.(((...((((.(((((((((((((((.((((((((((((((..((((..(((((....)))))((.......))..............))))..)))))))))))))).))).)))))))))))))))).))).	48.1	-66.7	1
255	357	3'	osa-miR5813	AAGCAGCGACTCTGGTCATGGA	22	Yes	4	7	3	2	3	5	4.22601	6.05483	2.79142	1.80528	3.70265	5.60701	Chr4	-	9952990	9953124	tggtgagctaattttcATGACCAGGTCACTGCTTGCCtttgcagtaccattatgggttaccgtgccagattgagggaaggaatgaaaagggtaaagcaaaggcAAGCAGCGACTCTGGTCATGGAattggagcca	Y	1	osa-MIR5813,	osa-MIR5813	tggtgagctaattttcatgaccaggtcactgcttgcctttgcagtaccattatgggttaccgtgccagattgagggaaggaatgaaaagggtaaagcaaaggcAAGCAGCGACTCTGGTCATGGAattggagcca	1	osa-miR5813	AAGCAGCGACTCTGGTCATGGA	.(((...((((.(((((((((((((((.((((((((((((((..((((..(((((....)))))((.......))..............))))..)))))))))))))).))).)))))))))))))))).))).	48.1	-66.7	1
256	358	5'	osa-miR5814	AATCAAGTTAGGAACCATGCAAGT	24	Yes	7	7	14	6	9	8	7.39551	6.05483	13.0266	5.41583	11.1079	8.97122	Chr6	-	26661349	26661456	ggctactggtAATCAAGTTAGGAACCATGCAAGTtgtttatgagttgtgccctctgtgcctagcgccatAGATGACTTGCAAGATTTCTAACTtgagtgccagtgtcc	Y	1	osa-MIR5814,	osa-MIR5814	ggctactggtAATCAAGTTAGGAACCATGCAAGTtgtttatgagttgtgccctctgtgcctagcgccatagatgacttgcaagatttctaacttgagtgccagtgtcc	1	osa-miR5814	AATCAAGTTAGGAACCATGCAAGT	(((.(((((((.((((((((((((...(((((((..((((((.((((..(.....)..)..)))..))))))..)))))))...)))))))))))).)))))))))).	46.3	-49.9	1
257	359	5'	osa-miR5816_L+2R-2	TCTAGGAGTGTTTGTAGGAGCGCC	24	Diff	3	6	2	4	3	5	3.1695	5.18985	1.86094	3.61055	3.70265	5.60701	Chr9	-	11583948	11584087	TCTAGGAGTGTTTGTAGGAGCGCCacgtgaaaatgtaggagcgtatataggaagtttaatagacttttagtatataataGATTTCTAGGATTTCTCTAATTTatttgagagtcacgtagcgttgtaaaagcatttgtaga	Y	1	osa-MIR5816,	osa-MIR5816	tcTAGGAGTGTTTGTAGGAGCGCCACgtgaaaatgtaggagcgtatataggaagtttaatagacttttagtatataatagatttctaggatttctctaatttatttgagagtcacgtagcgttgtaaaagcatttgtaga	1	osa-miR5816	TAGGAGTGTTTGTAGGAGCGCCAC	((((..(((((((.....(((((.((((((.....((((((.((((((..((((((.....))))))..))))))......)))))).....((((..........)))).)))))).)))))....)))))))..))))	34.3	-36.7	0.8
258	360	3'	osa-miR5825_L-1R+1_1ss24GA	AAACATCTGATAACCTGAAACGGA	24	Diff	1	1	0	0	1	4	1.0565	0.864975	0	0	1.23422	4.48561					gtgctccctacgttttaaggttatatgacgttttaactttggttaaaaccaaactacttcaaatttaacttagtttatataccaaattagttttatgaaatcaatagctgaatatatttttataataaatttatgttgagttgaaaatattattattgttttctacaaacttgaattagtttgattttgaccaaaatcAAAACATCTGATAACCTGAAACGGgtcggtccac	Y	1	osa-MIR5825,	osa-MIR5825	gtgctccctacgttttaaggttatatgacgttttaactttggttaaaaccaaactacttcaaatttaacttagtttatataccaaattagttttatgaaatcaatagctgaatatatttttataataaatttatgttgagttgaaaatattattattgttttctacaaacttgaattagtttgattttgaccaaaatcAAAACATCTGATAACCTGAAACGGgtcggtccac	1	osa-miR5825	AAAACATCTGATAACCTGAAACGG	(((..((...((((((.(((((((..((.(((((...(((((((((((.(((((((.(((((..(((((..(((((((........((((((...((....))..)))))).((((....)))))))))))...)))))((.(((((((.......))))))).))....))))).))))))).)))))))))))...))))).))..)))))))))))))....))..)))	26.7	-58.7	0.9
259	361	5'	osa-miR5827_1ss2TC	TCTGTTGCAATTTGGACTACC	21	Diff	13	15	0	35	1	2	13.7345	12.9746	0	31.5923	1.23422	2.24281					tattttcaccTTTGTTGCAATTTGGACTACCctaaaccacttcttcagcacatcaattccagcccaccggtgaactcctccacctctttgcagattcatatctttgctggaggagaggccagacatggctagggaagagagttgaggtggtccaaagtgcaacaaagtaaaaaata	Y	1	osa-MIR5827,	osa-MIR5827	tattttcaccTTTGTTGCAATTTGGACTACCctaaaccacttcttcagcacatcaattccagcccaccggtgaactcctccacctctttgcagattcatatctttgctggaggagaggccagacatggctagggaagagagttgaggtggtccaaagtgcaacaaagtaaaaaata	1	osa-miR5827	TTTGTTGCAATTTGGACTACC	((((((...((((((((((.(((((((((((...(((..(((((..(((.(((.....((.(((....)))...((((((((.......(((((........))))))))))))).))......))))))..)))))...)))..))))))))))).))))))))))...))))))	44.9	-65.6	0.8
260	362	5'	osa-miR5828	TTACGGCATTAAAAGTAAATC	21	Yes	0	2	0	0	0	0	0	1.72995	0	0	0	0	Chr6	-	6690699	6690959	nntaacttgTTACCGCATTAAAAGTAAATCtataatgggagtaaaagcataagtctatctagaaatttgatttaatcaacatatcatagtcaccccacaactgatttacttctgatgtcatgacaagttnnn	Y	1	osa-MIR5828,	osa-MIR5828	aagtaacttgTTACGGCATTAAAAGTAAATCtattgtgggtttagaaacataagtctatttggaaattaaccccacaatggatttacttctaatgttgtgacaagttactt	0	osa-miR5828	TTACGGCATTAAAAGTAAATC	...(((((((((..((((((.(((((((((.....((((.((....)).((((((.............))))))...................)))).....))))))))).))))))..)))))))))...	29.5	-32.3	0.8
261	363	5'	osa-MIR5830-p5_1ss2AG	AGAATCACACATGTAGATGAG	21	New	2	3	1	6	0	2	2.113	2.59493	0.930472	5.41583	0	2.24281	Chr1	-	4352437	4352631	AAAATCACACATGTAGATGAGgtgatgttacacactttgtttatcatatataaaaataacattttttttggacaaatcatcaagacatttttcttgttcaaactttattatttttatatctcacaaacgaagacaagtttagacaagattttatatatggttgtgtagcatcgtattatctacatgtgtggtttt	Y	1	osa-MIR5830,	osa-MIR5830	aaaatcacacATGTAGATGAGGTGATGTTACACActttgtttatcatatataaaaataacattttttttggacaaatcatcaagacatttttcttgttcaaactttattatttttatatctcacaaacgaagacaagtttagacaagattttatatatggttgtgtagcatcgtattatctacatgtgtggtttt	1	osa-MIR5830-p5	aaaatcacacATGTAGATGAG	((((((((((((((((((((..((((((((((((........(((((((((((((..........((((((........))))))......((((((..((((((.............................))))))..)))))))))))))))))))))))))))))))..))))))))))))))))))))	26.7	-64.1	1.2
262	364	3'	osa-miR5831_L+1R-4_1ss16AG	TTAGTCAAACTTAGAGTAGTT	21	Diff	2.33333	2	3	6	3	17	2.46517	1.72995	2.79142	5.41583	3.70265	19.0638					tttggtcaaatttaaactactctaagtttaactaattttataaaaagatagtaatattttaaataaattttcataatatatttattttgggttaaaaatattactacttttttctataaaatTAGTCAAACTTAGAATAGTTGGACtttaactaaa	Y	1	osa-MIR5831,	osa-MIR5831	tttggtcaaatttaaactactctaagtttaactaattttataaaaagatagtaatattttaaataaattttcataatatatttattttgggttaaaaatattactacttttttctataaaatTAGTCAAACTTAGAATAGTTGGACtttaactaaa	1	osa-miR5831	TAGTCAAACTTAGAATAGTTGGAC	((((((.(((.(..(((((.(((((((((.((((((((((((((((((((((((((((((.(((......(((.((((....)))).)))))).)))))))))))).)))))).)))))))))))).))))))))).)))))..).))).))))))	16.7	-43.3	1.7
263	365	3'	osa-MIR6246-p3	GCCTTTGGGAGGAACTCTTCCAGT	24	New	0	0	1	1	1	4	0	0	0.930472	0.902638	1.23422	4.48561	Chr3	+	1625438	1625521	aaccctcagaTTGGGGATTTCCTGCCGGAGGAAgctttttggaggagctGCCTTTGGGAGGAACTCTTCCAGTtctgagggttt	Y	1	osa-MIR6246,	osa-MIR6246	aaccctcagaTTGGGGATTTCCTGCCGGAGGAAgctttttggaggagctgcctttgggaggaactcttccagttctgagggttt	1	osa-MIR6246-p3	gcctttgggaggaactcttccagt	(((((((((((((((((.(((((.((..(((.(((((.......))))).)))..)).))))).)).))))).)))))))))).	52.4	-47.4	1.1
264	366	5'	osa-miR6249	CGTGAAGAGCTCGCCGGCGGC	21	Yes	30	6	1.5	2	0.5	0	31.695	5.18985	1.39571	1.80528	0.617108	0	Chr3	-	744619	744700	ccatcccgcgCGTGAAGAGCTCGCCGGCGGCcatggccatctccaccgccgcgccgatgctgccttgccgacggcgattggg	Y	1	osa-MIR6249,	osa-MIR6249	ccatcccgcgCGTGAAGAGCTCGCCGGCGGCcatggccatctccaccgccgcgccgatgctgccttgccgacggcgattggg	1	osa-miR6249	CGTGAAGAGCTCGCCGGCGGC	((((((((((.(..(..(((((((((((((...(((......))))))))).)).)).)))...)..))).))).))).)).	73.2	-32.6	0.5
265	367	5'	osa-MIR6250-p5	TCGTCCTCTCTTGTTCTTGTTA	22	New	1	3	1	2	2	4	1.0565	2.59493	0.930472	1.80528	2.46843	4.48561	Chr6	+	28264615	28264740	tgttttttttctttttggttgaaTCGTCCTCTCTTGTTCTTGTTAaggtgggggcaccaatatatcaccatggtgccagccatctctgcgagaaggggATAGATCGACGCGTCAAGAAATCGTTTc	Y	1	osa-MIR6250,	osa-MIR6250	tgttttttttctttttggttgaatcgtcctctcttgttcttgttaaggtgggggcaccaatatatcaccatggtgccagccatctctgcgagaaGGGGATAGATCGACGCGTCAAGaaatcgtttc	1	osa-MIR6250-p5	tcgtcctctcttgttcttgtta	.......((((((..((((((.((((((((((.....((((((..((((((.(((((((...........)))))))..))))))..))))))))))))).))))))).))..)))))).......	45.2	-47	0.8
266	368	5'	osa-miR6251	TGTGTAGCCACATTGTAAGGG	21	Yes	9	22	8	17	3	19	9.50851	19.0295	7.44378	15.3448	3.70265	21.3066	Chr9	+	15792337	15792550	tggcatgccaTGTGTAGCCACATTGTAAGGGagtccttgtgcacatggtcaatctcgcagaaagcccactgcaatccaaatcttcttcacgattgttcctattcaccaaatcacccgtcttctcgaatgaccgcccaccatttccctctgttgctgttgctaacatccatggcccagggacccaCTTGCAGCGTGGCTACATGtggcatgccac	Y	1	osa-MIR6251,	osa-MIR6251	tggcatgccaTGTGTAGCCACATTGTAAGGGagtccttgtgcacatggtcaatctcgcagaaagcccactgcaatccaaatcttcttcacgattgttcctattcaccaaatcacccgtcttctcgaatgaccgcccaccatttccctctgttgctgttgctaacatccatggcccagggacccacttgcagcgtggctacatgtggcatgccac	1	osa-miR6251	TGTGTAGCCACATTGTAAGGG	((((((((((..(((((((((..((((((((.(((((((.((.((((((((.((..((((........))))......((((........))))..............................)).)))))................((((((....)).))))...))))).))))))))).))))))..)))))))))..)))))))))).	51.9	-85.6	0.8
266	369	3'	osa-MIR6251-p3	CTTGCAGCGTGGCTACATG	19	New	11	8	5	15	3	13	11.6215	6.9198	4.65236	13.5396	3.70265	14.5782	Chr9	+	15792337	15792550	tggcatgccaTGTGTAGCCACATTGTAAGGGagtccttgtgcacatggtcaatctcgcagaaagcccactgcaatccaaatcttcttcacgattgttcctattcaccaaatcacccgtcttctcgaatgaccgcccaccatttccctctgttgctgttgctaacatccatggcccagggacccaCTTGCAGCGTGGCTACATGtggcatgccac	Y	1	osa-MIR6251,	osa-MIR6251	tggcatgccaTGTGTAGCCACATTGTAAGGGagtccttgtgcacatggtcaatctcgcagaaagcccactgcaatccaaatcttcttcacgattgttcctattcaccaaatcacccgtcttctcgaatgaccgcccaccatttccctctgttgctgttgctaacatccatggcccagggacccacttgcagcgtggctacatgtggcatgccac	1	osa-MIR6251-p3	cttgcagcgtggctacatg	((((((((((..(((((((((..((((((((.(((((((.((.((((((((.((..((((........))))......((((........))))..............................)).)))))................((((((....)).))))...))))).))))))))).))))))..)))))))))..)))))))))).	51.9	-85.6	0.8
267	370	3'	osa-MIR6253-p3_1ss22AT	AACAATCATTTTCCTCTCATTT	22	New	2	9	2	2	1	0	2.113	7.78478	1.86094	1.80528	1.23422	0	Chr7	-	25019014	25019092	atatcaattagaggaaagtggGCAGTTGGGTTAAGCTTATTCTGTTTTctccAACAATCATTTTCCTCTCATTAgacct	Y	1	osa-MIR6253,	osa-MIR6253	atatcaattaGAGGAAAGTGGGCAGTTGGGTTaagcttattctgttttctccaacaatcattttcctctcattagacct	1	osa-MIR6253-p3	aacaatcattttcctctcatta	...(((((.((((((((((((...((((((..((((.......))))..))))))..)))))))))))).))).))...	36.7	-27.4	0.9
268	371	5'	osa-miR6254	TGCTCCGGATATTATGGCATG	21	Yes	1	0	1	3	0	2	1.0565	0	0.930472	2.70791	0	2.24281					aattgcataaTGCTCCGGATATTATGGCATGtagcatataaccctagtcattatggtatcaaggtttcgcaaaacccagcattcactcaaatcataaaaaaaacaacttgttgacacatattcacttcatttttcatgccataaaccactatgtattgttcaaatgttggttacttgatcaggatgaccagtttaatcagtcaacgttttgaacattattatgtcaaggatggtaaaattagctgaaatttgaactaggatggattttatgatacttctaggttatagagcatagggttatgtgcctcgagtcataatatccggaggtttatgcaact	Y	1	osa-MIR6254,	osa-MIR6254	aattgcataaTGCTCCGGATATTATGGCATGtagcatataaccctagtcattatggtatcaaggtttcgcaaaacccagcattcactcaaatcataaaaaaaacaacttgttgacacatattcacttcatttttcatgccataaaccactatgtattgttcaaatgttggttacttgatcaggatgaccagtttaatcagtcaacgttttgaacattattatgtcaaggatggtaaaattagctgaaatttgaactaggatggattttatgatacttctaggttatagagcatagggttatgtgcctcgagtcataatatccggaggtttatgcaact	1	osa-miR6254	TGCTCCGGATATTATGGCATG	..((((((((..((((((((((((((((..(..(((((((((((((........(((((((.(((((....)))))...(((((...................(((....)))............((((..(((((((((((.....((...(((.(((((((((((((..(..((((...((....))...))))..)..))))).)))))))).)))...)).....))))))........)))))..))))...))))).......)))))))((((.....))))...)))))))))))))..)..))))))))))))))))..))))))))..	34.6	-103.1	0.9
